# Supplementary material for: Insights into the tectonic evolution of the Svecofennian orogeny based on in situ Lu–Hf dating of garnet and apatite from Olkiluoto, southwestern Finland
Source: Copernicus journal article supplement (doi:10.5194/se-16-97-2025), 2025-02-11
Supplement: Supplementary file 1 [file se-16-97-2025-supplement.zip]

## Sheet: Index
Supplementary data tables
Table S1 - WR compositions
Table S2 - Garnet mineral chemistry
Table S3 - Mineral chemistry biotite plagioclase and K feldspar
Table S4 - Garnet Lu-Hf data
Table S5 - Apatite Lu-Hf data
Table S6 - Apatite U-Pb data and TE data
Table S7 - Geochemical data

## Sheet: Table S1
Table S1 - Whole rock XRF compositions with calculated molar compositions used for P-T modelling
Wt% oxides from XRF analysis
Sample	SiO2	TiO2	Al2O3	Cr2O3	Fe2O3	FeO*	MnO	MgO	ZnO	CaO	Na2O	K2O	P2O5
OLK MM30A	67.208	0.476	14.507	0.009	4.466	4.02	0.055	0.897	0.011	1.453	2.219	6.881	0.7
*FeO calculated assuming all Fe2+
Bulk composition for modelling (moles)
MM30A
TXH2O	SI	Al	Fe	Mn	Mg	Ca	Na	K	H	O
0	64.81	16.4939	3.24167	0.0490038	1.29378	1.49806	4.15037	8.46324	0.5	167
1	64.81	16.4939	3.24167	0.0490038	1.29378	1.49806	4.15037	8.46324	12	172.75
MM30A	CaO value obtained by using amount of P to determine maximum amount of Apt present (max CaO in apt is 0.93)
TXCa	SI	Al	Fe	Mn	Mg	Ca	Na	K	H	O
0	65.44	16.65	3.27	0.05	1.31	0.54	4.19	8.54	3.95	169.38
1	64.81	16.49	3.24	0.05	1.29	1.5	4.15	8.46	3.95	168.73
PT1	64.97	16.53	3.24	0.05	1.29	1.26	4.16	8.48	3.95	168.89		at 0.75TXCa
PT2	65.28	16.61	3.27	0.05	1.31	0.78	4.18	8.52	3.95	169.22		0.25TXCa - not used

## Sheet: Table S2
Table S2 - garnet mineral chemistry for samples MM30 (small garnet) and MM31 (large garnet) obtained by EPMA
Small garnet - sample MM30
ID number	130 / 1 .	131 / 1 .	132 / 1 .	133 / 1 .	134 / 1 .	135 / 1 .	136 / 1 .	137 / 1 .	138 / 1 .	139 / 1 .	140 / 1 .	141 / 1 .	142 / 1 .	143 / 1 .	144 / 1 .	145 / 1 .	146 / 1 .	147 / 1 .	148 / 1 .	149 / 1 .	150 / 1 .	151 / 1 .	152 / 1 .	153 / 1 .	154 / 1 .	155 / 1 .	156 / 1 .	157 / 1 .	158 / 1 .	159 / 1 .	160 / 1 .	161 / 1 .	162 / 1 .	163 / 1 .	164 / 1 .	165 / 1 .	166 / 1 .	167 / 1 .	168 / 1 .	169 / 1 .	170 / 1 .	171 / 1 .	172 / 1 .	173 / 1 .	174 / 1 .	175 / 1 .	176 / 1 .	177 / 1 .	178 / 1 .
Analysis No.	130	131	132	133	134	135	136	137	138	139	140	141	142	143	144	145	146	147	148	149	150	151	152	153	154	155	156	157	158	159	160	161	162	163	164	165	166	167	168	169	170	171	172	173	174	175	176	177	178
Mineral	grt	grt	grt	grt	grt	grt	grt	grt	grt	grt	grt	grt	grt	grt	grt	grt	grt	grt	grt	grt	grt	grt	grt	grt	grt	grt	grt	grt	grt	grt	grt	grt	grt	grt	grt	grt	grt	grt	grt	grt	grt	grt	grt	grt	grt	grt	grt	grt	grt
SiO2	35.9927	36.19	36.2379	36.1307	36.2888	36.2435	36.3036	36.1339	36.4585	36.2227	36.3017	36.1941	36.2076	36.2898	36.0782	35.9147	35.9268	35.8763	35.9564	36.0847	35.9602	35.9243	36.0131	35.9665	35.9034	35.8425	35.9361	36.4136	36.14	36.08	36.0693	36.2461	36.0826	35.9532	36.6586	36.093	36.1926	35.9072	35.6884	35.4988	36.0738	35.9957	36.014	36.0844	36.2325	35.9624	35.7621	36.1666	36.3898
TiO2	0.0049	0.0236	0	0	0.0183	0.0054	0.011	0.0146	0.0029	0.0147	0.0046	0.0118	0	0.0207	0	0.0176	0.0028	0	0.0128	0	0.0046	0.02	0	0.0152	0	0.0206	0.0089	0.0217	0.0057	0.0007	0	0.0019	0.0029	0.0303	0.0204	0	0.0142	0	0.0163	0.0041	0	0.0007	0.0002	0	0	0.0166	0.0067	0.0075	0.0232
Al2O3	20.9751	21.1753	21.191	21.3131	21.079	21.0869	21.0968	21.403	21.1772	21.359	20.9113	21.2696	21.1102	21.3431	21.0025	21.3418	20.9569	21.1461	21.1475	21.154	21.0151	21.2137	21.0279	21.1982	21.0856	21.0425	20.9886	21.2696	20.7467	20.9029	21.0567	21.0177	20.9599	21.0904	21.2242	21.3867	20.9437	21.1411	21.086	21.3109	20.9065	21.3431	20.8185	21.1307	21.0668	21.0728	20.9056	21.1676	21.1568
Cr2O3	0.0295	0.0104	0.0089	0.0124	0.0329	0.0115	0.0035	0.0176	0	0.0152	0.0121	0.0197	0.0003	0.0171	0.0158	0.0126	0.0067	0.0038	0.0023	0	0	0.0103	0.0101	0	0	0.0128	0.0154	0.0002	0.0025	0.0119	0	0.0067	0	0	0.0039	0.0047	0.0157	0	0.0242	0.0076	0.0015	0	0.0083	0	0	0.0176	0.0047	0.021	0.006
FeO	35.7545	35.4834	35.3728	35.3461	35.3119	35.1429	34.9971	35.128	35.119	34.8892	35.1733	35.0678	35.0251	35.0572	35.0836	35.1082	35.1099	35.1412	35.2188	35.1036	35.2109	35.4029	35.1862	35.4436	35.4216	35.2903	35.3893	35.2114	35.2655	35.2981	35.245	35.204	35.2568	35.28	35.1174	35.3821	35.351	35.674	35.794	35.5121	35.3834	35.479	35.4581	35.3835	35.2973	34.8594	35.2012	35.1918	35.2065
MnO	4.5067	4.0488	3.8269	3.8345	3.761	3.7535	3.8105	3.806	3.8197	3.9157	3.9829	4.0369	4.022	4.1242	4.0868	4.0543	4.076	4.1322	4.1504	4.0559	4.1804	4.1871	4.1653	4.0746	4.1833	4.1806	4.1928	4.1967	4.1839	4.1455	4.1906	4.2066	4.1418	4.2478	4.2268	4.2078	4.1953	4.2276	4.3079	4.2499	4.2113	4.2943	4.2476	4.2298	4.1752	4.1122	4.0927	4.1296	4.0717
MgO	1.8488	2.4949	2.6186	2.724	2.8829	2.9124	2.9187	2.8327	2.8448	2.7878	2.8656	2.774	2.7647	2.8079	2.7418	2.7174	2.6508	2.6562	2.7425	2.6515	2.6176	2.5978	2.5741	2.5543	2.6229	2.5397	2.5499	2.5596	2.6744	2.6283	2.5854	2.5978	2.5343	2.4143	2.5502	2.5592	2.5194	2.3228	1.998	2.4724	2.3813	2.5458	2.5062	2.5188	2.6187	2.5684	2.6691	2.7032	2.7429
ZnO	0	0	0	0	0	0	0	0	0	0	0	0	0	0	0	0	0	0	0	0	0	0	0	0	0	0	0	0	0	0	0	0	0	0	0	0	0	0	0	0	0	0	0	0	0	0	0	0	0
CaO	0.798	0.7928	0.7987	0.8176	0.8135	0.8206	0.8061	0.8169	0.8122	0.8121	0.8124	0.8113	0.813	0.8267	0.8158	0.8351	0.8054	0.8198	0.8142	0.766	0.8068	0.8083	0.8199	0.82	0.8173	0.8091	0.7925	0.7872	0.7878	0.8123	0.8107	0.8089	0.7965	0.7873	0.8069	0.8144	0.8264	0.8001	0.8002	0.812	0.8035	0.8166	0.8254	0.8164	0.8066	0.8029	0.8061	0.8253	0.8084
Na2O	0.0422	0.0225	0.0068	0.0116	0.0223	0.048	0.0064	0.0406	0.0489	0.0112	0.0218	0.0386	0.0174	0.0184	0.0108	0.0257	0.0353	0.0231	0.0114	0.0131	0.0336	0	0.0275	0.007	0.0226	0.0324	0	0.0144	0.0157	0.0271	0.0399	0.0236	0.037	0.0054	0.0284	0.0175	0.0238	0.0263	0.0356	0	0.0128	0.0135	0.0074	0.0274	0	0.0229	0.0086	0.0159	0.0028
K2O	0	0	0.0032	0.0068	0.0007	0.0053	0	0	0.0004	0	0	0	0	0	0	0.0015	0.0047	0.0047	0	0	0.0025	0	0	0	0	0	0	0	0	0.002	0	0	0	0	0	0	0.0023	0.0044	0.0028	0	0	0	0	0.0018	0.0006	0	0	0	0.0032
Total	99.9524	100.242	100.065	100.197	100.211	100.03	99.9537	100.193	100.284	100.028	100.086	100.224	99.9603	100.505	99.8353	100.029	99.5753	99.8034	100.056	99.8288	99.8317	100.164	99.8241	100.079	100.057	99.7705	99.8735	100.474	99.8222	99.9088	99.9976	100.113	99.8118	99.8087	100.637	100.465	100.084	100.104	99.7534	99.8678	99.7741	100.489	99.8857	100.193	100.198	99.4352	99.4568	100.228	100.411
No. Oxygens	12	12	12	12	12	12	12	12	12	12	12	12	12	12	12	12	12	12	12	12	12	12	12	12	12	12	12	12	12	12	12	12	12	12	12	12	12	12	12	12	12	12	12	12	12	12	12	12	12
Si	2.94876	2.94326	2.94748	2.9353	2.9461	2.94621	2.95083	2.93215	2.95375	2.94155	2.95258	2.93837	2.94697	2.93731	2.94372	2.92465	2.94131	2.93095	2.93014	2.94291	2.9383	2.92702	2.94179	2.93184	2.92988	2.93263	2.93756	2.94986	2.95332	2.94593	2.94156	2.95045	2.94797	2.93934	2.96211	2.92938	2.94993	2.93229	2.93016	2.90706	2.95115	2.92432	2.94563	2.93868	2.94722	2.94442	2.93437	2.93953	2.94915
Ti	0.000301934	0.00144359	0	0	0.00111743	0.000330156	0.000672479	0.000891078	0.000176712	0.00089785	0.0002814	0.000720514	0	0.00126017	0	0.00107797	0.000172414	0	0.000784538	0	0.000282699	0.00122563	0	0.000931918	0	0.00126771	0.000547189	0.00132218	0.00035034	4.29878e-05	0	0.000116325	0.000178203	0.00186315	0.00123979	0	0.000870508	0	0.00100657	0.000252531	0	4.27725e-05	1.23035e-05	0	0	0.00102223	0.000413484	0.000458483	0.00141415
Al	2.02516	2.02955	2.03128	2.04058	2.01677	2.02011	2.02088	2.0468	2.02197	2.04412	2.00441	2.03497	2.02488	2.03589	2.01954	2.04815	2.02199	2.03592	2.03096	2.03318	2.02365	2.03697	2.02431	2.03644	2.02782	2.02902	2.02194	2.03061	1.99803	2.01137	2.02377	2.01624	2.01811	2.03202	2.0211	2.04563	2.01176	2.03462	2.04028	2.0567	2.01563	2.04344	2.00672	2.02804	2.01949	2.03331	2.02155	2.02755	2.02068
Cr	0.00191069	0.000668679	0.000572299	0.000796421	0.00211162	0.000739054	0.000224909	0.00112909	0	0.00097585	0.000778046	0.00126439	1.93038e-05	0.00109423	0.00101919	0.000811179	0.000433653	0.000245431	0.000148178	0	0	0.000663468	0.000652255	0	0	0.000827969	0.000995224	1.28089e-05	0.000161513	0.000768152	0	0.000431169	0	0	0.000249135	0.000301575	0.00101167	0	0.00157082	0.000492038	9.70141e-05	0	0.000536699	0	0	0.00113922	0.000304884	0.00134938	0.000384426
Fe2+	2.44939	2.41306	2.40581	2.40116	2.39718	2.38877	2.37865	2.38357	2.37914	2.36913	2.39217	2.38057	2.38374	2.37272	2.39364	2.39063	2.40356	2.40061	2.39988	2.39392	2.40578	2.41202	2.4034	2.41592	2.41705	2.41445	2.41897	2.3852	2.40977	2.40996	2.40348	2.3962	2.40864	2.41181	2.37275	2.40126	2.40934	2.43601	2.45741	2.43175	2.42048	2.41018	2.42508	2.40955	2.40081	2.38657	2.4152	2.39175	2.38585
Mn2+	0.312696	0.278872	0.263617	0.26383	0.258594	0.258409	0.26231	0.261564	0.262086	0.269304	0.274355	0.277559	0.277241	0.282712	0.282406	0.279612	0.282615	0.285905	0.286445	0.280143	0.289289	0.288928	0.288162	0.281298	0.289116	0.289692	0.290267	0.287928	0.289563	0.286663	0.289437	0.29	0.286585	0.294114	0.289252	0.289232	0.289597	0.292387	0.29955	0.294752	0.291779	0.295465	0.294232	0.291737	0.287627	0.285144	0.284407	0.284261	0.279467
Mg	0.225808	0.302495	0.317528	0.32992	0.348923	0.352947	0.353679	0.342686	0.343599	0.337506	0.347468	0.335738	0.335467	0.338823	0.333512	0.329898	0.323537	0.323509	0.333184	0.322382	0.318862	0.31555	0.313474	0.310412	0.319096	0.30979	0.310744	0.309125	0.325817	0.31993	0.314335	0.315252	0.30868	0.294258	0.307203	0.309658	0.306136	0.282788	0.24456	0.301845	0.290427	0.308335	0.305596	0.30581	0.317559	0.3135	0.326499	0.327547	0.331399
Zn	0	0	0	0	0	0	0	0	0	0	0	0	0	0	0	0	0	0	0	0	0	0	0	0	0	0	0	0	0	0	0	0	0	0	0	0	0	0	0	0	0	0	0	0	0	0	0	0	0
Ca	0.0700405	0.0690757	0.0695976	0.0711605	0.0707547	0.0714639	0.0701949	0.0710169	0.0704954	0.0706523	0.0707892	0.0705622	0.0708906	0.0716862	0.0713111	0.0728554	0.0706408	0.0717515	0.0710829	0.0669275	0.0706257	0.0705558	0.071752	0.0716107	0.0714526	0.0709224	0.0694027	0.0683195	0.0689701	0.0710548	0.0708307	0.0705414	0.069716	0.0689564	0.0698502	0.0708129	0.0721614	0.0699989	0.0703858	0.071239	0.0704217	0.0710732	0.0723259	0.0712291	0.0702901	0.0704261	0.0708603	0.0718628	0.0701883
Na	0.00670263	0.00354757	0.00107227	0.00182702	0.00350985	0.00756454	0.00100852	0.00638712	0.00768056	0.00176328	0.00343748	0.00607525	0.00274558	0.0028873	0.00170838	0.00405735	0.0056028	0.00365865	0.00180105	0.00207126	0.00532258	0	0.00435504	0.00110624	0.00357545	0.0051394	0	0.00226156	0.00248732	0.00428976	0.00630843	0.00372433	0.00586051	0.000855883	0.0044489	0.00275359	0.00376078	0.00416379	0.00566661	0	0.0020301	0.00212626	0.0011734	0.00432605	0	0.00363492	0.00136804	0.00250539	0.000439929
K	0	0	0.000332007	0.000704684	7.24908e-05	0.000549564	0	0	4.13375e-05	0	0	0	0	0	0	0.000155812	0.000490828	0.000489788	0	0	0.00026057	0	0	0	0	0	0	0	0	0.000208302	0	0	0	0	0	0	0.000239127	0.000458339	0.000293246	0	0	0	0	0.000186988	6.2255e-05	0	0	0	0.000330808
Ni	0	0	0	0	0	0	0	0	0	0	0	0	0	0	0	0	0	0	0	0	0	0	0	0	0	0	0	0	0	0	0	0	0	0	0	0	0	0	0	0	0	0	0	0	0	0	0	0	0
Cl	0	0	0	0	0	0	0	0	0	0	0	0	0	0	0	0	0	0	0	0	0	0	0	0	0	0	0	0	0	0	0	0	0	0	0	0	0	0	0	0	0	0	0	0	0	0	0	0	0
F	0	0	0	0	0	0	0	0	0	0	0	0	0	0	0	0	0	0	0	0	0	0	0	0	0	0	0	0	0	0	0	0	0	0	0	0	0	0	0	0	0	0	0	0	0	0	0	0	0
Total Cations (S)	8.04076	8.04197	8.03729	8.04528	8.04513	8.04709	8.03845	8.04619	8.03895	8.03589	8.04626	8.04583	8.04195	8.04438	8.04686	8.0519	8.05035	8.05304	8.05442	8.04153	8.05238	8.05293	8.0479	8.04956	8.05799	8.05374	8.05043	8.03464	8.04847	8.05021	8.04971	8.04296	8.04573	8.04322	8.0282	8.04903	8.04481	8.05272	8.05089	8.06409	8.04201	8.05498	8.05131	8.04956	8.04307	8.03916	8.05497	8.04681	8.03929
Xmg (mg/(fe+mg))	0.0844079	0.111393	0.116595	0.120802	0.127061	0.128732	0.129442	0.125699	0.126196	0.124696	0.12683	0.123601	0.123369	0.124956	0.122293	0.121262	0.118638	0.118758	0.121908	0.118684	0.117029	0.115689	0.11538	0.113857	0.116622	0.113716	0.113838	0.114732	0.119103	0.117195	0.115657	0.116267	0.113597	0.10874	0.11463	0.114226	0.112738	0.104012	0.0905116	0.11042	0.107133	0.113421	0.111912	0.112622	0.11682	0.116108	0.119086	0.120453	0.121961
Xmg(divalent)	0.0738433	0.0987415	0.103884	0.107603	0.113455	0.114907	0.115399	0.112032	0.112459	0.110781	0.11264	0.10956	0.109367	0.110512	0.108253	0.107354	0.105032	0.104975	0.107806	0.105238	0.103374	0.102217	0.101883	0.100808	0.103043	0.100423	0.100585	0.101334	0.105302	0.103617	0.10212	0.102621	0.100429	0.0958763	0.101085	0.100834	0.0994843	0.091779	0.0796117	0.0973822	0.0945061	0.0999451	0.0986675	0.0993427	0.103228	0.102597	0.105425	0.106505	0.108057
D	0	97.4166	181.476	281.895	392.683	490.1	581.517	686.407	769.894	882.911	973.183	1078.87	1176.29	1274.29	1366.73	1469.67	1531.36	1680.67	1778.08	1902.36	2016.59	2086.23	2215.7	2316.14	2402.59	2491.34	2598.17	2699.21	2793.24	2884.29	2993.05	3092.1	3202.1	3284.56	3408.53	3516.07	3602.53	3674.93	3780.99	3957.64	4072.66	4160.89	4253.74	4352.55	4449.97	4539.44	4649.06	4747.25	4835.48
Xalm	0.800995	0.78768	0.787099	0.783139	0.779456	0.777698	0.77611	0.77924	0.778688	0.777633	0.775474	0.776839	0.777136	0.773896	0.776937	0.777948	0.780287	0.77897	0.776512	0.781465	0.779943	0.781333	0.78114	0.784583	0.780521	0.782679	0.782994	0.781886	0.778823	0.780527	0.780837	0.780015	0.783649	0.785827	0.780752	0.781924	0.782956	0.790609	0.799963	0.78454	0.787633	0.781244	0.782982	0.782747	0.780425	0.781037	0.77986	0.777698	0.777934
Xpyr	0.0738433	0.0987415	0.103884	0.107603	0.113455	0.114907	0.115399	0.112032	0.112459	0.110781	0.11264	0.10956	0.109367	0.110512	0.108253	0.107354	0.105032	0.104975	0.107806	0.105238	0.103374	0.102217	0.101883	0.100808	0.103043	0.100423	0.100585	0.101334	0.105302	0.103617	0.10212	0.102621	0.100429	0.0958763	0.101085	0.100834	0.0994843	0.091779	0.0796117	0.0973822	0.0945061	0.0999451	0.0986675	0.0993427	0.103228	0.102597	0.105425	0.106505	0.108057
Xsps	0.102257	0.0910304	0.0862467	0.0860482	0.0840832	0.0841289	0.0855872	0.0855111	0.08578	0.0883952	0.0889384	0.0905746	0.0903848	0.0922106	0.0916643	0.09099	0.0917476	0.0927728	0.0926828	0.0914494	0.0937863	0.0935937	0.0936566	0.0913528	0.0933622	0.093908	0.0939564	0.0943851	0.0935848	0.0928429	0.0940317	0.0944012	0.0932402	0.0958292	0.0951784	0.0941828	0.0941097	0.0948941	0.0975126	0.095094	0.0949458	0.095773	0.0949983	0.0947712	0.0934981	0.0933172	0.0918342	0.0924301	0.0911237
Xgrs	0.0229045	0.022548	0.02277	0.023209	0.0230063	0.0232661	0.0229034	0.023217	0.0230729	0.0231906	0.0229479	0.0230262	0.0231114	0.0233815	0.0231464	0.0237082	0.0229327	0.0232826	0.0229998	0.0218477	0.0228966	0.0228554	0.0233204	0.0232559	0.0230737	0.0229905	0.0224649	0.0223957	0.0222907	0.0230129	0.0230113	0.0229628	0.0226821	0.0224676	0.0229842	0.0230588	0.0234501	0.0227181	0.0229127	0.0229834	0.0229155	0.0230379	0.0233518	0.0231389	0.022849	0.0230479	0.0228806	0.0233669	0.0228857
PART 2: CATION RECALCULATION INCORPORATING Fe3+
ID number	130 / 1 .	131 / 1 .	132 / 1 .	133 / 1 .	134 / 1 .	135 / 1 .	136 / 1 .	137 / 1 .	138 / 1 .	139 / 1 .	140 / 1 .	141 / 1 .	142 / 1 .	143 / 1 .	144 / 1 .	145 / 1 .	146 / 1 .	147 / 1 .	148 / 1 .	149 / 1 .	150 / 1 .	151 / 1 .	152 / 1 .	153 / 1 .	154 / 1 .	155 / 1 .	156 / 1 .	157 / 1 .	158 / 1 .	159 / 1 .	160 / 1 .	161 / 1 .	162 / 1 .	163 / 1 .	164 / 1 .	165 / 1 .	166 / 1 .	167 / 1 .	168 / 1 .	169 / 1 .	170 / 1 .	171 / 1 .	172 / 1 .	173 / 1 .	174 / 1 .	175 / 1 .	176 / 1 .	177 / 1 .	178 / 1 .
Analysis No.	130	131	132	133	134	135	136	137	138	139	140	141	142	143	144	145	146	147	148	149	150	151	152	153	154	155	156	157	158	159	160	161	162	163	164	165	166	167	168	169	170	171	172	173	174	175	176	177	178
Mineral	grt	grt	grt	grt	grt	grt	grt	grt	grt	grt	grt	grt	grt	grt	grt	grt	grt	grt	grt	grt	grt	grt	grt	grt	grt	grt	grt	grt	grt	grt	grt	grt	grt	grt	grt	grt	grt	grt	grt	grt	grt	grt	grt	grt	grt	grt	grt	grt	grt
wt% SiO2	35.9384	36.0287	36.1483	35.9798	36.1322	36.149	36.2519	35.9825	36.2859	36.1489	36.1885	36.0322	36.1475	36.0289	36.0549	35.8132	35.9912	35.8538	35.8406	36.0731	35.9287	35.7727	35.9921	35.851	35.7815	35.8307	35.8931	36.1802	36.1186	36.0244	35.9825	36.129	36.0698	35.9461	36.3762	35.8397	36.0829	35.7779	35.6881	35.4349	36.0813	35.7245	35.965	35.9278	36.0848	36.0973	35.8609	36.0015	36.171
wt% TiO2	0.0048926	0.0234948	0	0	0.018221	0.00538592	0.0109843	0.0145388	0.00288627	0.0146701	0.00458565	0.0117472	0	0.0205512	0	0.0175502	0.00280502	0	0.0127588	0	0.00459597	0.0199156	0	0.0151512	0	0.0205932	0.00888934	0.0215609	0.00569663	0.00069892	0	0.00189386	0.00289897	0.030294	0.0202429	0	0.014157	0	0.0162998	0.00409262	0	0.000694727	0.000199728	0	0	0.0166623	0.00671851	0.00746576	0.0230605
wt% Al2O3	20.9434	21.0809	21.1386	21.2241	20.988	21.0319	21.0667	21.3133	21.077	21.3155	20.8461	21.1745	21.0752	21.1897	20.9889	21.2815	20.9945	21.1328	21.0794	21.1472	20.9967	21.1242	21.0156	21.1301	21.014	21.0356	20.9635	21.1332	20.7344	20.8707	21.0061	20.9498	20.9525	21.0862	21.0607	21.2366	20.8802	21.065	21.0858	21.2725	20.9108	21.1823	20.7902	21.039	20.9809	21.1519	20.9634	21.071	21.0296
wt% Cr2O3	0.0294555	0.0103536	0.00887799	0.0123482	0.032758	0.01147	0.00349501	0.0175263	0	0.015169	0.0120623	0.0196119	0.000299502	0.0169771	0.0157898	0.0125644	0.00671202	0.00379762	0.00229259	0	0	0.0102565	0.0100941	0	0	0.0127958	0.0153816	0.000198718	0.00249852	0.0118816	0	0.00667836	0	0	0.00386996	0.00466702	0.0156524	0	0.0241998	0.00758631	0.00150031	0	0.0082887	0	0	0.017666	0.00471299	0.0209041	0.00596392
wt% Fe2O3	1.98076	2.04822	1.82356	2.21285	2.20687	2.30385	1.88332	2.26008	1.90762	1.75866	2.26085	2.24072	2.05175	2.17046	2.28821	2.53398	2.45666	2.58693	2.65424	2.02987	2.55358	2.5794	2.33685	2.4164	2.824	2.61812	2.4567	1.69386	2.36374	2.44818	2.42469	2.09731	2.23094	2.10729	1.38073	2.39178	2.18533	2.56455	2.47113	3.11497	2.04778	2.678	2.49794	2.41582	2.10238	1.914	2.67863	2.28597	1.92159
wt% FeO	33.9182	33.4822	33.6445	33.2073	33.1738	32.9782	33.2526	32.9472	33.2363	33.2357	33.0292	32.8947	33.1208	32.8522	33.002	32.7288	32.9623	32.7914	32.7171	33.2658	32.8823	32.9325	33.063	33.1554	32.7603	32.9229	33.1363	33.4615	33.1177	33.0408	32.9785	33.2031	33.2369	33.3768	33.6045	32.9816	33.2775	33.2379	33.5701	32.6452	33.5481	32.802	33.1622	33.0561	33.2617	33.2679	32.8882	32.9742	33.2657
wt% MnO	4.4999	4.03075	3.81743	3.81848	3.74477	3.74371	3.80507	3.79006	3.80162	3.90772	3.97048	4.01884	4.01533	4.09455	4.08416	4.04284	4.08331	4.12961	4.13703	4.05459	4.17673	4.16942	4.16287	4.06151	4.1691	4.17923	4.18778	4.1698	4.18143	4.13911	4.18052	4.19301	4.14033	4.24696	4.19424	4.17827	4.18258	4.21238	4.30786	4.24225	4.21218	4.26195	4.24182	4.21144	4.15818	4.12763	4.10401	4.11075	4.04721
wt% MgO	1.84601	2.48378	2.61212	2.71262	2.87046	2.90481	2.91454	2.82083	2.83133	2.78212	2.85666	2.76159	2.76011	2.78771	2.74003	2.70972	2.65555	2.65453	2.73367	2.65065	2.6153	2.58683	2.5726	2.54609	2.614	2.53886	2.54685	2.54319	2.67282	2.62425	2.57918	2.58941	2.5334	2.41382	2.53056	2.54124	2.51176	2.31444	1.99798	2.46795	2.38179	2.52662	2.50279	2.50787	2.60803	2.57804	2.67648	2.69086	2.72641
wt% ZnO	0	0	0	0	0	0	0	0	0	0	0	0	0	0	0	0	0	0	0	0	0	0	0	0	0	0	0	0	0	0	0	0	0	0	0	0	0	0	0	0	0	0	0	0	0	0	0	0	0
wt% CaO	0.796796	0.789265	0.796725	0.814185	0.80999	0.81846	0.804952	0.813478	0.808355	0.810445	0.809866	0.807671	0.811651	0.820757	0.815273	0.832739	0.806844	0.819286	0.811578	0.765753	0.806093	0.804888	0.819422	0.817366	0.814526	0.808834	0.791551	0.782154	0.787334	0.811047	0.80875	0.806287	0.796218	0.787144	0.800685	0.808685	0.823895	0.797219	0.800192	0.810537	0.803667	0.810448	0.824276	0.812857	0.803313	0.805912	0.808328	0.821533	0.803539
wt% Na2O	0.0421363	0.0223997	0.00678318	0.0115515	0.0222038	0.0478748	0.00639088	0.0404299	0.0486685	0.0111772	0.021732	0.0384273	0.0173711	0.0182677	0.010793	0.0256273	0.0353633	0.0230855	0.0113633	0.0130958	0.0335705	0	0.027484	0.00697751	0.0225233	0.0323893	0	0.0143077	0.0156907	0.0270582	0.039804	0.0235238	0.0369869	0.00539893	0.0281813	0.0173772	0.0237279	0.0262053	0.0355997	0	0.0128027	0.0133983	0.00738993	0.0272811	0	0.0229859	0.00862376	0.0158274	0.00278316
wt% K2O	0	0	0.00319209	0.0067716	0.00069698	0.00528618	0	0	0.000398106	0	0	0	0	0	0	0.00149576	0.00470843	0.00469705	0	0	0.00249781	0	0	0	0	0	0	0	0	0.00199692	0	0	0	0	0	0	0.00229303	0.00438416	0.00279997	0	0	0	0	0.00179219	0.000597555	0	0	0	0.00318076
Cl	0	0	0	0	0	0	0	0	0	0	0	0	0	0	0	0	0	0	0	0	0	0	0	0	0	0	0	0	0	0	0	0	0	0	0	0	0	0	0	0	0	0	0	0	0	0	0	0	0
F	0	0	0	0	0	0	0	0	0	0	0	0	0	0	0	0	0	0	0	0	0	0	0	0	0	0	0	0	0	0	0	0	0	0	0	0	0	0	0	0	0	0	0	0	0	0	0	0	0
Total	99.9524	100.242	100.065	100.197	100.211	100.03	99.9537	100.193	100.284	100.028	100.086	100.224	99.9603	100.505	99.8353	100.029	99.5753	99.8034	100.056	99.8288	99.8317	100.164	99.8241	100.079	100.057	99.7705	99.8735	100.474	99.8222	99.9088	99.9976	100.113	99.8118	99.8087	100.637	100.465	100.084	100.104	99.7534	99.8678	99.7741	100.489	99.8857	100.193	100.198	99.4352	99.4568	100.228	100.411
No. Oxygens	12	12	12	12	12	12	12	12	12	12	12	12	12	12	12	12	12	12	12	12	12	12	12	12	12	12	12	12	12	12	12	12	12	12	12	12	12	12	12	12	12	12	12	12	12	12	12	12	12
Si	2.93381	2.9279	2.93381	2.91878	2.92958	2.92897	2.93672	2.91531	2.93944	2.92841	2.9356	2.92163	2.9316	2.92111	2.92658	2.9058	2.92291	2.91165	2.91034	2.92771	2.91919	2.90778	2.92428	2.91379	2.90879	2.91306	2.91916	2.93714	2.93554	2.92755	2.92339	2.93469	2.93121	2.92355	2.95171	2.91154	2.9335	2.91309	2.91164	2.88395	2.93573	2.90436	2.92686	2.92059	2.93144	2.93007	2.91434	2.92243	2.93473
Ti	0.000300404	0.00143606	0	0	0.00111116	0.000328224	0.000669263	0.000885962	0.000175856	0.00089384	0.000279782	0.00071641	0	0.00125321	0	0.00107102	0.000171335	0	0.000779237	0	0.00028086	0.00121758	0	0.00092618	0	0.00125925	0.000543761	0.00131648	0.00034823	4.27197e-05	0	0.000115704	0.00017719	0.00185313	0.00123543	0	0.00086566	0	0.00100021	0.000250524	0	4.24805e-05	1.22251e-05	0	0	0.00101726	0.000410662	0.000455816	0.00140724
Al	2.01489	2.01896	2.02186	2.02909	2.00545	2.00829	2.01122	2.03505	2.01217	2.03499	1.99288	2.02338	2.01431	2.02465	2.00778	2.03495	2.00934	2.02251	2.01724	2.02268	2.01049	2.02358	2.01226	2.0239	2.01323	2.01548	2.00928	2.02186	1.986	1.99882	2.01127	2.00547	2.00664	2.0211	2.014	2.03317	2.00055	2.0213	2.02738	2.04036	2.0051	2.02949	1.99393	2.01555	2.00868	2.0234	2.00775	2.01576	2.0108
Cr	0.00190101	0.00066519	0.000569644	0.000791939	0.00209978	0.000734729	0.000223834	0.00112261	0	0.000971492	0.000773572	0.00125718	1.92031e-05	0.00108819	0.00101325	0.00080595	0.00043094	0.000243815	0.000147177	0	0	0.000659107	0.000648373	0	0	0.000822444	0.00098899	1.27537e-05	0.00016054	0.000763361	0	0.000428866	0	0	0.00024826	0.000299738	0.00100603	0	0.00156089	0.000488127	9.65074e-05	0	0.000533278	0	0	0.00113367	0.000302803	0.00134153	0.000382547
Fe3+	0.121663	0.125239	0.111357	0.135067	0.13463	0.140452	0.114792	0.137775	0.116272	0.107195	0.137992	0.136703	0.1252	0.132405	0.139748	0.154696	0.150113	0.158068	0.162168	0.123956	0.156108	0.157756	0.142856	0.147768	0.172733	0.160155	0.150333	0.103463	0.144548	0.149695	0.14822	0.128181	0.13641	0.128955	0.0842985	0.146196	0.133677	0.157111	0.151693	0.190751	0.125364	0.163813	0.152953	0.147761	0.128506	0.116896	0.16379	0.13962	0.117307
Fe2+	2.31531	2.27523	2.28329	2.25258	2.2491	2.23434	2.25248	2.23211	2.25135	2.25135	2.24042	2.23031	2.2461	2.22722	2.23995	2.22053	2.23841	2.22673	2.2215	2.2576	2.23402	2.23841	2.24624	2.25328	2.22692	2.23818	2.25349	2.27145	2.25071	2.24523	2.24042	2.25522	2.25853	2.2699	2.28011	2.24044	2.26224	2.26296	2.29019	2.22167	2.28247	2.22991	2.25667	2.24696	2.25945	2.25805	2.23492	2.23821	2.25688
Mn2+	0.31111	0.277417	0.262394	0.262345	0.257143	0.256897	0.261056	0.260063	0.260816	0.268101	0.272778	0.275978	0.275795	0.281152	0.280761	0.27781	0.280847	0.284022	0.284509	0.278696	0.287407	0.287029	0.286447	0.279566	0.287035	0.287759	0.288449	0.286687	0.287819	0.284875	0.28765	0.288451	0.284956	0.292533	0.288236	0.28747	0.287984	0.290473	0.297657	0.29241	0.290255	0.293448	0.292357	0.289941	0.286087	0.283755	0.282466	0.282607	0.278101
Mg	0.224663	0.300916	0.316055	0.328063	0.346966	0.350881	0.351987	0.340719	0.341935	0.335998	0.345471	0.333825	0.333717	0.336953	0.33157	0.327772	0.321513	0.321379	0.330932	0.320717	0.316788	0.313476	0.311608	0.308501	0.316799	0.307722	0.308798	0.307793	0.323855	0.317935	0.312393	0.313568	0.306925	0.292677	0.306124	0.307772	0.304431	0.280937	0.243014	0.299446	0.28891	0.306231	0.303649	0.303927	0.315859	0.311973	0.324271	0.325641	0.329779
Zn	0	0	0	0	0	0	0	0	0	0	0	0	0	0	0	0	0	0	0	0	0	0	0	0	0	0	0	0	0	0	0	0	0	0	0	0	0	0	0	0	0	0	0	0	0	0	0	0	0
Ca	0.0696854	0.0687152	0.0692746	0.0707601	0.0703578	0.0710457	0.0698591	0.0706092	0.0701538	0.0703367	0.0703821	0.0701603	0.0705208	0.0712907	0.0708959	0.0723858	0.070199	0.0712789	0.0706026	0.0665818	0.0701663	0.070092	0.0713249	0.0711698	0.0709383	0.0704492	0.068968	0.068025	0.0685547	0.0706116	0.0703933	0.0701647	0.0693198	0.0685859	0.0696048	0.0703816	0.0717595	0.0695407	0.069941	0.0706728	0.0700539	0.070588	0.071865	0.0707906	0.0699137	0.0700831	0.0703767	0.0714447	0.0698453
Na	0.00666865	0.00352905	0.0010673	0.00181674	0.00349016	0.00752028	0.00100369	0.00635046	0.00764335	0.0017554	0.00341771	0.00604065	0.00273126	0.00287137	0.00169843	0.0040312	0.00556776	0.00363456	0.00178888	0.00206056	0.00528796	0	0.00432912	0.00109943	0.00354972	0.00510511	0	0.00225181	0.00247233	0.004263	0.00626947	0.00370444	0.0058272	0.000851284	0.00443327	0.00273682	0.00373983	0.00413654	0.00563079	0	0.00201949	0.00211175	0.00116593	0.00429941	0	0.00361721	0.0013587	0.00249082	0.000437779
K	0	0	0.000330467	0.000700718	7.20841e-05	0.000546348	0	0	4.11373e-05	0	0	0	0	0	0	0.000154808	0.000487758	0.000486562	0	0	0.000258875	0	0	0	0	0	0	0	0	0.000207003	0	0	0	0	0	0	0.000237796	0.000455338	0.000291392	0	0	0	0	0.000185837	6.19217e-05	0	0	0	0.000329191
Ni	0	0	0	0	0	0	0	0	0	0	0	0	0	0	0	0	0	0	0	0	0	0	0	0	0	0	0	0	0	0	0	0	0	0	0	0	0	0	0	0	0	0	0	0	0	0	0	0	0
Cl	0	0	0	0	0	0	0	0	0	0	0	0	0	0	0	0	0	0	0	0	0	0	0	0	0	0	0	0	0	0	0	0	0	0	0	0	0	0	0	0	0	0	0	0	0	0	0	0	0
F	0	0	0	0	0	0	0	0	0	0	0	0	0	0	0	0	0	0	0	0	0	0	0	0	0	0	0	0	0	0	0	0	0	0	0	0	0	0	0	0	0	0	0	0	0	0	0	0	0
Total cations (S)	8	8	8	8	8	8	8	8	8	8	8	8	8	8	8	8	8	8	8	8	8	8	8	8	8	8	8	8	8	8	8	8	8	8	8	8	8	8	8	8	8	8	8	8	8	8	8	8	8
Xfe2+	0.911549	0.883191	0.87841	0.872875	0.866349	0.864274	0.864852	0.86757	0.868146	0.870138	0.866402	0.86981	0.870644	0.868592	0.871061	0.871376	0.874405	0.873875	0.870346	0.87561	0.875809	0.877159	0.878176	0.879576	0.875458	0.87913	0.879483	0.880665	0.87421	0.87596	0.877628	0.877931	0.880363	0.885788	0.881634	0.879221	0.881391	0.889564	0.904068	0.881225	0.887644	0.879253	0.881402	0.880854	0.877351	0.878611	0.873292	0.872987	0.872508
Xfe(tot.)	0.915592	0.888607	0.883405	0.879198	0.872939	0.871268	0.870558	0.874301	0.873804	0.875304	0.87317	0.876399	0.876631	0.875044	0.877707	0.878738	0.881362	0.881242	0.878092	0.881316	0.882971	0.884311	0.88462	0.886143	0.883378	0.886284	0.886162	0.885268	0.880897	0.882805	0.884343	0.883733	0.886403	0.89126	0.88537	0.885774	0.887262	0.895988	0.909488	0.88958	0.892867	0.886579	0.888088	0.887378	0.88318	0.883892	0.880914	0.879547	0.878039
fe3+/(fe3+ + fe2+)	0.0499239	0.0521727	0.0465026	0.0565691	0.0564787	0.0591428	0.0484913	0.0581359	0.0491092	0.0454494	0.0580186	0.0577533	0.052798	0.0561126	0.0587252	0.0651291	0.0628476	0.0662815	0.0680328	0.0520485	0.0653138	0.0658368	0.0597948	0.0615433	0.0719823	0.0667774	0.0625392	0.043565	0.0603475	0.0625049	0.0620521	0.053781	0.0569575	0.0537569	0.0356531	0.0612559	0.0557938	0.0649199	0.0621215	0.0790702	0.052065	0.0684344	0.063476	0.0617029	0.053814	0.0492206	0.0682824	0.0587176	0.0494094
Xfe2+ (almandine)	0.792706	0.778581	0.77901	0.773087	0.7693	0.76698	0.767355	0.768765	0.769888	0.769486	0.764896	0.766357	0.767601	0.763632	0.766273	0.766097	0.768957	0.766936	0.764047	0.7722	0.768132	0.769475	0.770416	0.773654	0.767456	0.770694	0.771821	0.774194	0.767915	0.76927	0.769677	0.770382	0.773541	0.77638	0.774475	0.770954	0.773041	0.77928	0.789502	0.770291	0.778551	0.768888	0.771632	0.771722	0.770799	0.772283	0.767478	0.767061	0.769057
Xmg (pyrope)	0.0769192	0.102973	0.107831	0.112591	0.118679	0.120447	0.119912	0.117348	0.116931	0.11484	0.117946	0.114706	0.114047	0.115529	0.113428	0.113083	0.110449	0.11069	0.113819	0.1097	0.108923	0.107761	0.106875	0.105923	0.109177	0.105961	0.105764	0.104907	0.110495	0.108932	0.10732	0.107115	0.105121	0.100105	0.103979	0.105907	0.104029	0.0967445	0.0837749	0.103823	0.0985474	0.10559	0.103828	0.104384	0.107753	0.106699	0.111355	0.111601	0.112376
Xmn (spessartine)	0.106517	0.0949317	0.0895235	0.090037	0.0879553	0.088185	0.0889342	0.0895687	0.0891907	0.0916338	0.0931284	0.0948291	0.0942521	0.0963966	0.0960465	0.0958462	0.0964788	0.0978236	0.0978521	0.0953267	0.0988203	0.0986693	0.0982454	0.0959876	0.0989198	0.0990867	0.0987941	0.0977135	0.0982002	0.0976048	0.0988198	0.0985347	0.0975964	0.100056	0.0979036	0.0989209	0.0984086	0.100028	0.102612	0.101383	0.0990059	0.101183	0.0999667	0.0995807	0.0975969	0.097048	0.0969995	0.0968528	0.0947662
Xfe3+ (andradite)	0.0608317	0.0626195	0.0556786	0.0675335	0.067315	0.0702258	0.057396	0.0688877	0.058136	0.0535973	0.0689961	0.0683513	0.0626	0.0662025	0.0698742	0.0773481	0.0750566	0.0790339	0.0810838	0.061978	0.0780541	0.0788778	0.0714279	0.0738842	0.0863663	0.0800774	0.0751664	0.0517316	0.0722739	0.0748474	0.0741099	0.0640907	0.0682051	0.0644775	0.0421493	0.0730978	0.0668386	0.0785553	0.0758467	0.0953754	0.062682	0.0819067	0.0764767	0.0738805	0.0642528	0.058448	0.081895	0.0698102	0.0586536
Xca (grossular)	-0.0369731	-0.0391052	-0.0320435	-0.0432486	-0.0432493	-0.045838	-0.033597	-0.0445691	-0.0341456	-0.029557	-0.0449671	-0.0442435	-0.0384997	-0.0417596	-0.0456212	-0.0523745	-0.0509413	-0.0544838	-0.0568012	-0.039204	-0.0539286	-0.054783	-0.0469649	-0.0494484	-0.0619191	-0.0558189	-0.0515448	-0.0285462	-0.0488839	-0.0506542	-0.0499269	-0.0401225	-0.0444633	-0.0410189	-0.0185069	-0.0488789	-0.0423173	-0.054608	-0.0517357	-0.070872	-0.0387866	-0.0575675	-0.0519036	-0.0495673	-0.0404022	-0.0344786	-0.0577275	-0.0453253	-0.034853
Large garnet - sample MM31
ID number	1 / 1 .	2 / 1 .	3 / 1 .	4 / 1 .	5 / 1 .	6 / 1 .	7 / 1 .	8 / 1 .	9 / 1 .	10 / 1 .	11 / 1 .	12 / 1 .	13 / 1 .	14 / 1 .	15 / 1 .	16 / 1 .	17 / 1 .	18 / 1 .	19 / 1 .	20 / 1 .	21 / 1 .	22 / 1 .	23 / 1 .	24 / 1 .	25 / 1 .	26 / 1 .	27 / 1 .	28 / 1 .	29 / 1 .	30 / 1 .	31 / 1 .	32 / 1 .	33 / 1 .	34 / 1 .	35 / 1 .	36 / 1 .	37 / 1 .	38 / 1 .	39 / 1 .	40 / 1 .	41 / 1 .	42 / 1 .	43 / 1 .	44 / 1 .	45 / 1 .	46 / 1 .	47 / 1 .	48 / 1 .	49 / 1 .
Analysis No.	1	2	3	4	5	6	7	8	9	10	11	12	13	14	15	16	17	18	19	20	21	22	23	24	25	26	27	28	29	30	31	32	33	34	35	36	37	38	39	40	41	42	43	44	45	46	47	48	49
Mineral	grt	grt	grt	grt	grt	grt	grt	grt	grt	grt	grt	grt	grt	grt	grt	grt	grt	grt	grt	grt	grt	grt	grt	grt	grt	grt	grt	grt	grt	grt	grt	grt	grt	grt	grt	grt	grt	grt	grt	grt	grt	grt	grt	grt	grt	grt	grt	grt	grt
SiO2	36.6394	36.3535	36.0729	36.2001	36.3037	36.6131	36.8287	36.3221	36.438	36.0115	36.1926	36.1115	36.1695	35.9647	36.2395	36.0049	36.329	36.2244	36.3761	36.6511	36.5553	36.3445	36.4171	36.172	36.1722	36.3394	36.5766	36.0129	36.4112	36.0501	36.4704	36.5295	35.422	36.2415	36.3793	36.4392	36.2386	36.2347	36.05	36.3291	36.2664	36.3552	36.5359	36.2269	36.472	36.1832	35.9773	36.3643	35.9056
TiO2	0.0074	0	0	0	0.0261	0.0216	0.0001	0.0127	0.0202	0.0143	0.0152	0.0038	0.0001	0.0175	0.0076	0.0252	0.0165	0.005	0.0055	0.0008	0	0.0115	0	0.008	0.0083	0.0058	0	0.0156	0.0044	0.0016	0.0344	0.0091	0.0204	0.0027	0.0109	0	0.02	0.0151	0.0094	0.0289	0.0148	0.0257	0.0227	0	0.0204	0	0.0016	0.0095	0.0146
Al2O3	21.4902	21.1772	21.2339	20.8592	21.1603	20.9473	21.4183	21.0043	21.3309	21.0535	21.2518	21.06	21.4153	20.761	21.3479	20.8345	21.3691	21.0943	21.3616	21.1407	21.3462	20.9679	21.3971	20.9628	21.2756	21.1542	21.2969	20.9039	21.4326	20.9138	21.1498	21.006	20.8663	21.1213	21.3609	21.1927	21.2953	20.9561	21.257	21.0658	21.1413	21.1251	21.4656	21.1578	21.1427	21.0273	21.2553	21.1317	21.1267
Cr2O3	0.0076	0.0208	0.0055	0.0276	0.0066	0.016	0.0076	0.0056	0.0167	0	0.0124	0.0079	0.0051	0	0.0173	0.013	0.0054	0.0164	0	0.0105	0.0076	0	0.0015	0.0114	0.0077	0.0066	0	0.0005	0.0175	0.0018	0.0007	0	0.0073	0.0018	0	0.0099	0.0026	0.0245	0	0	0	0.0128	0	0.022	0	0.0068	0	0	0.0083
FeO	35.2649	35.3463	35.1914	35.2287	35.3333	35.1881	35.1753	35.2314	35.143	35.2058	35.1357	35.2023	35.0247	35.1784	35.4709	35.3174	35.0169	35.0741	34.7703	35.0885	35.092	34.9936	34.9999	34.67	35.2271	35.2627	35.3751	35.1182	35.266	35.4122	35.6857	35.4231	35.4061	35.0331	35.002	35.139	35.0056	35.0541	35.2197	35.1296	35.196	35.042	34.7579	35.1594	34.9925	35.1892	35.237	35.079	35.3519
MnO	3.554	3.5516	3.5398	3.6671	3.5584	3.635	3.6744	3.6157	3.6907	3.7396	3.7563	3.8045	3.8404	3.8973	4.0672	4.0734	4.1978	4.3507	4.4059	4.4246	4.3985	4.3964	4.4691	4.1989	4.4736	4.4732	4.5541	4.5247	4.542	4.7446	4.9292	4.7525	4.7064	4.569	4.6023	4.6309	4.6244	4.5804	4.6025	4.571	4.528	4.4401	4.3954	4.3872	4.4633	4.5301	4.6135	4.5417	4.6618
MgO	2.9584	2.9884	2.9971	3.0084	2.9332	3.0351	2.9918	2.9546	2.8958	3.0161	2.9805	2.8606	2.8208	2.8724	2.5618	2.8514	2.7058	2.686	2.5012	2.5714	2.5464	2.5984	2.5076	2.7081	2.243	2.4634	2.1457	2.3566	2.1926	2.1989	1.6591	2.0983	2.2685	2.3844	2.3393	2.2839	2.2842	2.2936	2.2354	2.3402	2.3574	2.5447	2.5187	2.5525	2.4791	2.4588	2.3282	2.1448	2.0061
ZnO	0	0	0	0	0	0	0	0	0	0	0	0	0	0	0	0	0	0	0	0	0	0	0	0	0	0	0	0	0	0	0	0	0	0	0	0	0	0	0	0	0	0	0	0	0	0	0	0	0
CaO	0.8298	0.8296	0.842	0.8177	0.8425	0.8229	0.8253	0.8364	0.8346	0.8548	0.8511	0.8317	0.8379	0.8447	0.8428	0.8346	0.84	0.8599	0.8659	0.8378	0.8584	0.8543	0.8448	0.815	0.8511	0.8294	0.8373	0.8565	0.8544	0.8305	0.8375	0.8071	0.8167	0.8271	0.8678	0.8426	0.861	0.8746	0.8225	0.8422	0.8679	0.7291	0.8368	0.8364	0.8522	0.8555	0.8516	0.8416	0.8624
Na2O	0	0.0324	0.0181	0.0342	0	0.0143	0.0166	0.0144	0.0231	0.026	0.0412	0.0138	0	0.0498	0.0304	0.0285	0.0103	0.0149	0.02	0.0259	0.0311	0.0307	0.0247	0.0201	0.0354	0.0303	0.0334	0.0605	0.0061	0.0078	0.0159	0.0126	0.0299	0.009	0.0386	0.038	0.0117	0.0061	0.0023	0.0165	0.0218	0.0081	0.0357	0.0291	0.0233	0.0282	0.0063	0.0232	0.0232
K2O	0	0	0	0	0.0019	0.0001	0	0.0032	0.0004	0	0.0016	0.0001	0	0	0.0034	0	0.0029	0	0	0.0043	0	0	0.0013	0.0813	0	0	0.0013	0	0.007	0	0.0075	0.0051	0	0	0	0	0	0	0	0	0	0.0035	0.006	0	0.0012	0	0.0042	0.0058	0
NiO	0	0	0	0	0	0	0	0	0	0	0	0	0	0	0	0	0	0	0	0	0	0	0	0	0	0	0	0	0	0	0	0	0	0	0	0	0	0	0	0	0	0	0	0	0	0	0	0	0
Cl	0	0	0	0	0	0	0	0	0	0	0	0	0	0	0	0	0	0	0	0	0	0	0	0	0	0	0	0	0	0	0	0	0	0	0	0	0	0	0	0	0	0	0	0	0	0	0	0	0
F	0	0	0	0	0	0	0	0	0	0	0	0	0	0	0	0	0	0	0	0	0	0	0	0	0	0	0	0	0	0	0	0	0	0	0	0	0	0	0	0	0	0	0	0	0	0	0	0	0
Total	100.752	100.3	99.9007	99.843	100.166	100.294	100.938	100	100.393	99.9216	100.238	99.8962	100.114	99.5858	100.589	99.9829	100.494	100.326	100.306	100.756	100.835	100.197	100.663	99.6476	100.294	100.565	100.82	99.8494	100.734	100.161	100.79	100.643	99.5436	100.19	100.601	100.576	100.343	100.039	100.199	100.323	100.394	100.286	100.575	100.371	100.447	100.279	100.275	100.142	99.9606
No. Oxygens	12	12	12	12	12	12	12	12	12	12	12	12	12	12	12	12	12	12	12	12	12	12	12	12	12	12	12	12	12	12	12	12	12	12	12	12	12	12	12	12	12	12	12	12	12	12	12	12	12
Si	2.94913	2.94545	2.93473	2.9498	2.94561	2.96402	2.95785	2.95223	2.94687	2.93363	2.93556	2.942	2.93574	2.94375	2.93621	2.93822	2.94071	2.94271	2.94933	2.96103	2.95061	2.95533	2.94517	2.95372	2.9426	2.94732	2.95833	2.94605	2.94693	2.94527	2.96133	2.96466	2.91844	2.94967	2.94656	2.95448	2.94459	2.95553	2.93775	2.95371	2.94732	2.95261	2.95183	2.94275	2.95674	2.94539	2.93104	2.9604	2.93835
Ti	0.000447991	0	0	0	0.00159278	0.0013152	6.04061e-06	0.000776381	0.00122871	0.000876176	0.000927272	0.000232848	6.10474e-06	0.00107734	0.000463138	0.00154673	0.00100456	0.000305498	0.000335399	4.86113e-05	0	0.000703325	0	0.000491336	0.000507839	0.000353809	0	0.000959839	0.000267843	9.83174e-05	0.00210086	0.000555475	0.00126415	0.000165281	0.000664017	0	0.00122229	0.00092636	0.000576142	0.00176727	0.000904643	0.00156987	0.0013794	0	0.00124387	0	9.80403e-05	0.000581689	0.00089864
Al	2.03852	2.02211	2.03585	2.00314	2.02337	1.9985	2.02724	2.01195	2.03304	2.02124	2.03141	2.02202	2.04847	2.00264	2.0384	2.00372	2.03852	2.01949	2.04113	2.01282	2.03054	2.00933	2.03934	2.01733	2.03971	2.02198	2.02997	2.0153	2.04428	2.01364	2.02387	2.00912	2.02606	2.0259	2.03897	2.02501	2.03924	2.01443	2.04147	2.01846	2.02481	2.02194	2.04383	2.02546	2.01997	2.0172	2.04075	2.0274	2.03752
Cr	0.00048362	0.00133234	0.000353748	0.00177802	0.000423363	0.00102402	0.000482556	0.000359842	0.00106775	0	0.000795131	0.000508825	0.000327258	0	0.00110814	0.000838708	0.000345571	0.00105326	0	0.00067064	0.000484975	0	9.5905e-05	0.000735947	0.000495213	0.000423193	0	3.23368e-05	0.00111974	0.000116261	4.49355e-05	0	0.000475494	0.00011582	0	0.000634588	0.000167021	0.00157987	0	0	0	0.000821852	0	0.00141283	0	0.000437612	0	0	0.000536987
Fe2+	2.37351	2.39471	2.39401	2.4004	2.39724	2.38201	2.36227	2.39448	2.37656	2.39818	2.383	2.39812	2.37713	2.4077	2.40315	2.40999	2.37017	2.38252	2.35732	2.37041	2.36849	2.37935	2.36687	2.3673	2.39627	2.39149	2.39246	2.40224	2.38668	2.41921	2.42295	2.40393	2.43926	2.38423	2.37059	2.38234	2.37845	2.39085	2.39993	2.3883	2.39177	2.37975	2.34817	2.38818	2.3721	2.39524	2.40046	2.38795	2.41912
Mn2+	0.242271	0.243707	0.243896	0.253072	0.244522	0.249223	0.249928	0.248892	0.252787	0.258005	0.25803	0.262502	0.263992	0.270163	0.279087	0.281526	0.287779	0.299326	0.302538	0.302739	0.30068	0.302763	0.3061	0.290383	0.308214	0.30726	0.31195	0.31348	0.31133	0.328289	0.338971	0.326657	0.328402	0.314939	0.3157	0.317992	0.318235	0.316412	0.317645	0.314748	0.311651	0.305401	0.300753	0.30182	0.306443	0.312307	0.318319	0.313136	0.323097
Mg	0.354999	0.360968	0.363507	0.365463	0.354806	0.366305	0.358217	0.358016	0.349141	0.366298	0.360401	0.347439	0.341328	0.350505	0.309439	0.346901	0.326527	0.325295	0.302329	0.309706	0.306417	0.314991	0.302335	0.329675	0.272026	0.297858	0.258725	0.287404	0.264557	0.267824	0.200837	0.253877	0.278639	0.289315	0.28247	0.276066	0.276702	0.278903	0.271575	0.283655	0.285615	0.308106	0.303371	0.30911	0.299622	0.29839	0.282773	0.260308	0.244748
Zn	0	0	0	0	0	0	0	0	0	0	0	0	0	0	0	0	0	0	0	0	0	0	0	0	0	0	0	0	0	0	0	0	0	0	0	0	0	0	0	0	0	0	0	0	0	0	0	0	0
Ca	0.0715551	0.0720106	0.0733873	0.0713837	0.0732346	0.0713698	0.0710105	0.0728308	0.0723115	0.0746019	0.0739562	0.0725914	0.07286	0.074071	0.0731562	0.0729664	0.072845	0.074837	0.0752137	0.0725133	0.0742288	0.0744216	0.0731949	0.0712978	0.0741752	0.0720668	0.0725516	0.0750639	0.074083	0.0726909	0.0728541	0.0701747	0.0720879	0.0721185	0.0753013	0.0731905	0.0749513	0.0764262	0.0718072	0.0733584	0.075564	0.0634378	0.0724295	0.0727878	0.0740147	0.0746067	0.0743277	0.0734012	0.0756087
Na	0	0.00508931	0.00285479	0.00540279	0	0.00224435	0.00258467	0.00226908	0.00362182	0.00410625	0.00647854	0.00217964	0	0.00790245	0.00477515	0.00450896	0.00161638	0.00234661	0.00314373	0.00405661	0.00486664	0.00483964	0.00387267	0.00318201	0.005583	0.00476431	0.00523719	0.00959501	0.000957136	0.00123544	0.00250295	0.00198249	0.00477592	0.0014201	0.00606117	0.00597315	0.0018431	0.000964604	0.000363368	0.00260079	0.0034347	0.00127536	0.00559176	0.00458273	0.003662	0.00445034	0.000995043	0.00366161	0.00368076
K	0	0	0	0	0.000196647	1.03265e-05	0	0.000331771	4.12644e-05	0	0.000165539	1.03922e-05	0	0	0.000351393	0	0.000299437	0	0	0.000443132	0	0	0.000134109	0.0084683	0	0	0.000134121	0	0.000722674	0	0.000776814	0.000527972	0	0	0	0	0	0	0	0	0	0.00036259	0.000618347	0	0.000124092	0	0.000436467	0.000602299	0
Ni	0	0	0	0	0	0	0	0	0	0	0	0	0	0	0	0	0	0	0	0	0	0	0	0	0	0	0	0	0	0	0	0	0	0	0	0	0	0	0	0	0	0	0	0	0	0	0	0	0
Cl	0	0	0	0	0	0	0	0	0	0	0	0	0	0	0	0	0	0	0	0	0	0	0	0	0	0	0	0	0	0	0	0	0	0	0	0	0	0	0	0	0	0	0	0	0	0	0	0	0
F	0	0	0	0	0	0	0	0	0	0	0	0	0	0	0	0	0	0	0	0	0	0	0	0	0	0	0	0	0	0	0	0	0	0	0	0	0	0	0	0	0	0	0	0	0	0	0	0	0
Total Cations (S)	8.03092	8.04537	8.04859	8.05044	8.041	8.03603	8.02958	8.04214	8.03667	8.05693	8.05073	8.0476	8.03985	8.05781	8.04614	8.06021	8.03981	8.04788	8.03134	8.03443	8.03632	8.04173	8.03712	8.04258	8.03958	8.04351	8.02937	8.05012	8.03094	8.04837	8.02625	8.03148	8.06941	8.03787	8.03632	8.03569	8.0354	8.03602	8.04112	8.0366	8.04108	8.03526	8.02798	8.0461	8.03392	8.04802	8.0492	8.02745	8.04356
Xmg (mg/(fe+mg))	0.130107	0.130991	0.131824	0.132134	0.128924	0.133283	0.131674	0.130069	0.128092	0.132502	0.13137	0.126546	0.12556	0.127077	0.114075	0.125831	0.121084	0.120132	0.113673	0.115557	0.114552	0.116908	0.113268	0.122239	0.101947	0.110755	0.0975883	0.106856	0.0997862	0.0996724	0.0765448	0.0955215	0.10252	0.108214	0.106469	0.103846	0.104213	0.104468	0.101656	0.10616	0.106677	0.114629	0.114413	0.1146	0.112146	0.110776	0.105385	0.0982939	0.0918769
Xmg(divalent)	0.116686	0.117526	0.118221	0.118261	0.115579	0.11936	0.117779	0.116457	0.114442	0.118272	0.117189	0.112781	0.111716	0.112977	0.100965	0.111494	0.106802	0.105548	0.0995355	0.101365	0.10047	0.102552	0.0991748	0.107784	0.0891687	0.0970641	0.0852277	0.0933677	0.0871213	0.0867299	0.0661604	0.0831121	0.0893533	0.0945287	0.0927936	0.0905257	0.0907714	0.0910676	0.0887223	0.0926959	0.0931982	0.100797	0.100297	0.100625	0.0981666	0.0968628	0.0919323	0.0857743	0.0799157
D	0	239.27	478.086	635.81	973.544	1206.6	1481.1	1685.28	1918.51	2170.15	2386.16	2643.39	2882.21	3121.48	3360.75	3600.46	3839.73	4038.61	4347.22	4564.26	4785.82	5045.19	5284.46	5523.27	5807.33	6002.57	6327.97	6583.96	6842.46	7130.33	7298.83	7858.4	8102.8	8342.07	8582.23	8821.05	9054.68	9311	9509.64	9952.2	10213.4	10839.9	10984.4	11253.2	11454.3	11740.4	11889.7	12344.8	12577.6
Xalm	0.780161	0.779681	0.778591	0.776748	0.78091	0.776175	0.776699	0.778891	0.778996	0.774334	0.774862	0.778445	0.778032	0.776067	0.784105	0.774572	0.775244	0.773049	0.776098	0.775818	0.776601	0.774648	0.776405	0.773968	0.785486	0.779323	0.788112	0.780407	0.785958	0.78342	0.798175	0.786976	0.782219	0.779007	0.778759	0.781201	0.780245	0.780663	0.784046	0.780475	0.780451	0.778537	0.776325	0.777428	0.777182	0.777538	0.780414	0.786857	0.789898
Xpyr	0.116686	0.117526	0.118221	0.118261	0.115579	0.11936	0.117779	0.116457	0.114442	0.118272	0.117189	0.112781	0.111716	0.112977	0.100965	0.111494	0.106802	0.105548	0.0995355	0.101365	0.10047	0.102552	0.0991748	0.107784	0.0891687	0.0970641	0.0852277	0.0933677	0.0871213	0.0867299	0.0661604	0.0831121	0.0893533	0.0945287	0.0927936	0.0905257	0.0907714	0.0910676	0.0887223	0.0926959	0.0931982	0.100797	0.100297	0.100625	0.0981666	0.0968628	0.0919323	0.0857743	0.0799157
Xsps	0.0796332	0.0793474	0.0793208	0.0818921	0.0796539	0.081209	0.0821744	0.0809608	0.0828592	0.0833058	0.0839018	0.0852099	0.0864043	0.0870808	0.0910611	0.0904827	0.0941278	0.0971214	0.0996043	0.0990843	0.0985894	0.0985708	0.10041	0.094938	0.101031	0.100128	0.102761	0.101839	0.102524	0.106311	0.111665	0.106938	0.105311	0.102901	0.10371	0.104274	0.104396	0.103315	0.103773	0.102857	0.101694	0.0999122	0.0994316	0.0982521	0.100401	0.101381	0.103489	0.103182	0.105499
Xgrs	0.0235198	0.0234456	0.0238673	0.0230992	0.0238564	0.0232557	0.0233478	0.0236908	0.0237025	0.0240878	0.0240478	0.0235637	0.023847	0.0238751	0.0238696	0.0234515	0.0238264	0.0242821	0.0247625	0.0237331	0.0243388	0.0242295	0.0240101	0.0233102	0.0243143	0.0234847	0.0238996	0.0243857	0.0243963	0.0235397	0.0239998	0.0229732	0.023117	0.0235635	0.0247371	0.0240001	0.0245876	0.0249547	0.023459	0.0239728	0.024657	0.0207537	0.0239459	0.0236947	0.0242498	0.0242187	0.0241647	0.0241865	0.024688
PART 2: CATION RECALCULATION INCORPORATING Fe3+
ID number	1 / 1 .	2 / 1 .	3 / 1 .	4 / 1 .	5 / 1 .	6 / 1 .	7 / 1 .	8 / 1 .	9 / 1 .	10 / 1 .	11 / 1 .	12 / 1 .	13 / 1 .	14 / 1 .	15 / 1 .	16 / 1 .	17 / 1 .	18 / 1 .	19 / 1 .	20 / 1 .	21 / 1 .	22 / 1 .	23 / 1 .	24 / 1 .	25 / 1 .	26 / 1 .	27 / 1 .	28 / 1 .	29 / 1 .	30 / 1 .	31 / 1 .	32 / 1 .	33 / 1 .	34 / 1 .	35 / 1 .	36 / 1 .	37 / 1 .	38 / 1 .	39 / 1 .	40 / 1 .	41 / 1 .	42 / 1 .	43 / 1 .	44 / 1 .	45 / 1 .	46 / 1 .	47 / 1 .	48 / 1 .	49 / 1 .
Analysis No.	1	2	3	4	5	6	7	8	9	10	11	12	13	14	15	16	17	18	19	20	21	22	23	24	25	26	27	28	29	30	31	32	33	34	35	36	37	38	39	40	41	42	43	44	45	46	47	48	49
Mineral	grt	grt	grt	grt	grt	grt	grt	grt	grt	grt	grt	grt	grt	grt	grt	grt	grt	grt	grt	grt	grt	grt	grt	grt	grt	grt	grt	grt	grt	grt	grt	grt	grt	grt	grt	grt	grt	grt	grt	grt	grt	grt	grt	grt	grt	grt	grt	grt	grt
wt% SiO2	36.3107	36.1642	36.0227	36.1675	36.1706	36.4414	36.4333	36.2469	36.2298	35.9393	36.0168	36.0648	36.0577	36.0123	35.9461	35.9052	36.08	36.0223	36.2092	36.3149	36.1879	36.1989	36.1114	36.2242	35.9964	36.0584	36.2269	35.979	36.0913	35.9073	36.1382	36.2402	35.4645	36.1058	36.0977	36.1672	36.052	36.1567	35.9062	36.1472	36.0517	36.1888	36.2772	36.0115	36.2495	35.9979	35.7925	36.2641	35.8435
wt% TiO2	0.00733362	0	0	0	0.0260043	0.0214987	9.89264e-05	0.0126737	0.0200846	0.0142713	0.0151261	0.00379508	9.9691e-05	0.0175231	0.00753847	0.0251302	0.0163869	0.0049721	0.00547477	0.000792661	0	0.0114539	0	0.00801154	0.00825966	0.00575515	0	0.0155853	0.00436134	0.00159366	0.0340866	0.00902793	0.0204245	0.00268989	0.0108156	0	0.019897	0.0150675	0.00936252	0.0287553	0.0147124	0.0255824	0.0225393	0	0.0202755	0	0.00159178	0.00947383	0.0145748
wt% Al2O3	21.2974	21.0669	21.2044	20.8404	21.0827	20.849	21.1884	20.9608	21.209	21.0113	21.1485	21.0327	21.3491	20.7885	21.1751	20.7768	21.2226	20.9766	21.2636	20.9468	21.1317	20.8839	21.2175	20.993	21.1722	20.9906	21.0933	20.8842	21.2443	20.8309	20.9571	20.8396	20.8913	21.0422	21.1955	21.0345	21.1857	20.911	21.1722	20.9603	21.0161	21.0284	21.3136	21.032	21.0137	20.9196	21.1461	21.0735	21.0902
wt% Cr2O3	0.00753183	0.0206917	0.00549235	0.0275751	0.00657581	0.0159249	0.00751841	0.0055884	0.0166046	0	0.0123398	0.00788977	0.00508424	0	0.0171599	0.012964	0.00536299	0.0163085	0	0.0104037	0.00752362	0	0.00148741	0.0114164	0.00766258	0.00654896	0	0.00049953	0.0173462	0.00179287	0.000693623	0	0.00730876	0.00179326	0	0.00982611	0.00258662	0.0244473	0	0	0	0.0127414	0	0.0218692	0	0.00676518	0	0	0.00828565
wt% Fe2O3	1.5179	2.22127	2.37829	2.46582	2.00729	1.76608	1.45284	2.06292	1.79778	2.78081	2.48153	2.32661	1.95173	2.81972	2.25202	2.93367	1.94762	2.33711	1.53421	1.68365	1.77585	2.03777	1.8145	2.08223	1.93061	2.12241	1.43377	2.44078	1.5107	2.35146	1.27701	1.53431	3.36321	1.84832	1.77412	1.74186	1.72832	1.75706	2.00384	1.78573	2.00359	1.72334	1.37082	2.24953	1.65808	2.33989	2.39568	1.34058	2.11876
wt% FeO	33.5827	33.1635	33.0024	32.9781	33.3976	33.4339	33.4904	33.3022	33.3246	32.6331	32.7321	33.0632	33.1603	32.6877	33.1573	32.5799	33.0244	32.7754	33.2303	33.2517	33.1414	33.0198	33.0734	32.8464	33.3187	33.0803	33.7467	32.8889	33.5968	33.156	34.2116	33.762	32.4223	33.2388	33.1346	33.3094	33.2702	33.3977	33.2762	33.3469	33.1848	33.3309	33.2783	32.9262	33.2871	32.9035	32.9004	33.7761	33.3843
wt% MnO	3.52212	3.5331	3.53488	3.66379	3.54536	3.61795	3.63495	3.60821	3.66962	3.73211	3.73805	3.79958	3.82853	3.90245	4.03427	4.06212	4.16903	4.32642	4.38569	4.38401	4.35429	4.37878	4.43159	4.20496	4.45186	4.43861	4.51055	4.52044	4.50209	4.7258	4.8843	4.71486	4.71205	4.5519	4.56667	4.59633	4.60059	4.57055	4.58415	4.54812	4.50119	4.41978	4.36428	4.36112	4.43607	4.5069	4.5898	4.52919	4.65374
wt% MgO	2.93186	2.97284	2.99293	3.00569	2.92245	3.02086	2.95968	2.94848	2.87926	3.01006	2.96602	2.8569	2.81208	2.8762	2.54106	2.84351	2.68725	2.67101	2.48972	2.54781	2.52081	2.58799	2.48655	2.71201	2.2321	2.44435	2.12518	2.35438	2.17333	2.19019	1.64399	2.08168	2.27122	2.37547	2.32119	2.26685	2.27244	2.28867	2.22649	2.32849	2.34344	2.53305	2.50087	2.53733	2.46398	2.44621	2.31624	2.13889	2.00263
wt% ZnO	0	0	0	0	0	0	0	0	0	0	0	0	0	0	0	0	0	0	0	0	0	0	0	0	0	0	0	0	0	0	0	0	0	0	0	0	0	0	0	0	0	0	0	0	0	0	0	0	0
wt% CaO	0.822356	0.82528	0.840829	0.816963	0.839412	0.81904	0.81644	0.834668	0.829832	0.853087	0.846965	0.830624	0.835311	0.845817	0.835976	0.832289	0.834242	0.855101	0.861927	0.830114	0.849773	0.850877	0.837709	0.816176	0.846964	0.822986	0.829294	0.855694	0.846892	0.827209	0.829871	0.800708	0.81768	0.824004	0.861082	0.836311	0.856568	0.872718	0.81922	0.837984	0.862762	0.725763	0.830876	0.831428	0.847001	0.851119	0.847226	0.839281	0.860909
wt% Na2O	0	0.0322313	0.0180748	0.0341692	0	0.0142329	0.0164218	0.0143702	0.022968	0.0259479	0.0409998	0.0137821	0	0.0498659	0.0301539	0.0284211	0.0102294	0.0148169	0.0199082	0.0256624	0.0307874	0.030577	0.0244927	0.020129	0.035228	0.0300657	0.0330806	0.0604431	0.0060464	0.00776909	0.0157552	0.0125002	0.0299359	0.00896631	0.0383012	0.0377164	0.0116398	0.00608688	0.00229083	0.0164174	0.0216709	0.00806293	0.0354473	0.028927	0.0231578	0.0280556	0.00626764	0.0231361	0.0231599
wt% K2O	0	0	0	0	0.00189304	9.95309e-05	0	0.00319337	0.000397715	0	0.00159223	9.98706e-05	0	0	0.00337247	0	0.00288012	0	0	0.00426055	0	0	0.00128909	0.0814173	0	0	0.00128757	0	0.00693849	0	0.00743168	0.00505961	0	0	0	0	0	0	0	0	0	0.00348398	0.00595752	0	0.00119268	0	0.00417843	0.00578402	0
Cl	0	0	0	0	0	0	0	0	0	0	0	0	0	0	0	0	0	0	0	0	0	0	0	0	0	0	0	0	0	0	0	0	0	0	0	0	0	0	0	0	0	0	0	0	0	0	0	0	0
F	0	0	0	0	0	0	0	0	0	0	0	0	0	0	0	0	0	0	0	0	0	0	0	0	0	0	0	0	0	0	0	0	0	0	0	0	0	0	0	0	0	0	0	0	0	0	0	0	0
Total	100.752	100.3	99.9007	99.843	100.166	100.294	100.938	100	100.393	99.9216	100.238	99.8962	100.114	99.5858	100.589	99.9829	100.494	100.326	100.306	100.756	100.835	100.197	100.663	99.6476	100.294	100.565	100.82	99.8494	100.734	100.161	100.79	100.643	99.5436	100.19	100.601	100.576	100.343	100.039	100.199	100.323	100.394	100.286	100.575	100.371	100.447	100.279	100.275	100.142	99.9606
No. Oxygens	12	12	12	12	12	12	12	12	12	12	12	12	12	12	12	12	12	12	12	12	12	12	12	12	12	12	12	12	12	12	12	12	12	12	12	12	12	12	12	12	12	12	12	12	12	12	12	12	12
Si	2.93777	2.92884	2.91701	2.93132	2.93059	2.95074	2.94695	2.93676	2.93343	2.9129	2.91707	2.9246	2.92119	2.92263	2.91937	2.91627	2.92615	2.9252	2.93782	2.94834	2.93727	2.93999	2.93157	2.93808	2.92811	2.93138	2.94751	2.9277	2.93558	2.92757	2.95165	2.95304	2.89334	2.93577	2.93324	2.94135	2.93162	2.94228	2.92273	2.94025	2.93227	2.93965	2.94155	2.92589	2.94426	2.92782	2.91312	2.95028	2.92244
Ti	0.000446266	0	0	0	0.00158466	0.0013093	6.01836e-06	0.000772312	0.00122311	0.000869985	0.00092143	0.000231471	6.07448e-06	0.00106961	0.000460482	0.00153518	0.000999582	0.00030368	0.00033409	4.8403e-05	0	0.000699676	0	0.000488735	0.000505339	0.000351895	0	0.000953862	0.000266811	9.77264e-05	0.00209399	0.000553298	0.00125328	0.000164502	0.000661016	0	0.00121691	0.000922207	0.000573196	0.00175922	0.000900021	0.00156298	0.00137459	0	0.00123862	0	9.7441e-05	0.0005797	0.000893773
Al	2.03068	2.0107	2.02356	1.99059	2.01306	1.98954	2.01977	2.00141	2.02376	2.00696	2.01861	2.01006	2.03832	1.98827	2.02671	1.98875	2.02842	2.00747	2.03317	2.00419	2.02136	1.99891	2.02992	2.00665	2.02967	2.01104	2.02255	2.00275	2.03641	2.00154	2.01726	2.00124	2.00864	2.01635	2.02975	2.01602	2.03025	2.0054	2.03103	2.00927	2.01447	2.01306	2.03671	2.01385	2.01144	2.00517	2.02828	2.02047	2.02649
Cr	0.000481758	0.00132482	0.000351613	0.00176688	0.000421205	0.00101943	0.000480778	0.000357957	0.00106287	0	0.000790121	0.000505816	0.000325636	0	0.00110179	0.000832443	0.00034386	0.00104699	0	0.000667766	0.000482783	0	9.54621e-05	0.00073205	0.000492775	0.000420904	0	3.21354e-05	0.00111543	0.000115563	4.47886e-05	0	0.000471404	0.000115274	0	0.000631769	0.000166286	0.00157279	0	0	0	0.000818245	0	0.00140474	0	0.000435001	0	0	0.000534079
Fe3+	0.092402	0.135355	0.144904	0.15037	0.122367	0.107597	0.0884191	0.125758	0.109522	0.169583	0.151223	0.141958	0.11897	0.172181	0.137615	0.179282	0.118847	0.142797	0.0936583	0.102849	0.108453	0.124526	0.110832	0.127072	0.118162	0.129822	0.0877729	0.149438	0.0924539	0.144251	0.078478	0.0940691	0.206449	0.113077	0.10847	0.106586	0.105744	0.107582	0.122726	0.10929	0.122614	0.105329	0.083633	0.137519	0.101329	0.143191	0.146707	0.0820605	0.129978
Fe2+	2.27197	2.24585	2.23465	2.23499	2.26265	2.26374	2.26515	2.25618	2.25619	2.21165	2.21676	2.24198	2.24638	2.21825	2.25175	2.2127	2.23958	2.22555	2.25446	2.2574	2.24934	2.24248	2.24511	2.2277	2.26631	2.24873	2.29594	2.23785	2.28504	2.26042	2.33655	2.30044	2.21183	2.25992	2.25141	2.26518	2.26223	2.27255	2.26493	2.26813	2.25694	2.26397	2.25635	2.23698	2.26075	2.23775	2.23908	2.29773	2.27604
Mn2+	0.241338	0.242333	0.242423	0.251487	0.243275	0.248106	0.249007	0.247587	0.251633	0.256182	0.256405	0.26095	0.262683	0.268225	0.277486	0.279423	0.286354	0.297545	0.301358	0.301441	0.299321	0.301192	0.304687	0.288845	0.306696	0.305598	0.310809	0.311528	0.310131	0.326316	0.337862	0.325377	0.325577	0.313455	0.314273	0.316579	0.316833	0.314994	0.316021	0.313314	0.310059	0.304061	0.299705	0.300091	0.305149	0.310444	0.316373	0.312065	0.321348
Mg	0.353632	0.358933	0.361312	0.363174	0.352997	0.364663	0.356898	0.35614	0.347547	0.36371	0.35813	0.345384	0.339636	0.34799	0.307665	0.34431	0.32491	0.32336	0.30115	0.308379	0.305032	0.313356	0.300939	0.32793	0.270687	0.296247	0.257778	0.285614	0.263538	0.266214	0.200181	0.252882	0.276242	0.287952	0.281193	0.27484	0.275483	0.277653	0.270187	0.282363	0.284156	0.306754	0.302313	0.307339	0.298357	0.296609	0.281045	0.259418	0.243422
Zn	0	0	0	0	0	0	0	0	0	0	0	0	0	0	0	0	0	0	0	0	0	0	0	0	0	0	0	0	0	0	0	0	0	0	0	0	0	0	0	0	0	0	0	0	0	0	0	0	0
Ca	0.0712796	0.0716044	0.0729442	0.0709365	0.0728612	0.0710498	0.0707489	0.0724492	0.0719815	0.0740748	0.0734902	0.0721621	0.0724989	0.0735396	0.0727367	0.0724214	0.0724843	0.0743917	0.0749201	0.0722025	0.0738934	0.0740354	0.0728569	0.0709203	0.07381	0.071677	0.0722862	0.0745965	0.0737976	0.072254	0.0726158	0.0698997	0.0714678	0.0717787	0.074961	0.0728655	0.074621	0.0760836	0.07144	0.0730243	0.075178	0.0631594	0.0721771	0.0723707	0.0737022	0.0741615	0.0738733	0.0731502	0.0751992
Na	0	0.00506061	0.00283755	0.00536894	0	0.00223428	0.00257515	0.00225719	0.0036053	0.00407723	0.00643772	0.00216674	0	0.00784576	0.00474777	0.00447527	0.00160838	0.00233265	0.00313146	0.00403923	0.00484465	0.00481453	0.00385478	0.00316516	0.00555552	0.00473854	0.00521804	0.00953527	0.000953449	0.00122801	0.00249477	0.00197472	0.00473484	0.00141341	0.00603378	0.00594662	0.00183498	0.00096028	0.00036151	0.00258894	0.00341715	0.00126976	0.00557228	0.00455647	0.00364654	0.00442379	0.000988961	0.00364909	0.00366083
K	0	0	0	0	0.000195644	1.02802e-05	0	0.000330032	4.10761e-05	0	0.000164496	1.03307e-05	0	0	0.000349378	0	0.000297954	0	0	0.000441233	0	0	0.000133489	0.00842347	0	0	0.00013363	0	0.00071989	0	0.000774274	0.000525902	0	0	0	0	0	0	0	0	0	0.000360999	0.000616192	0	0.000123568	0	0.000433799	0.00060024	0
Ni	0	0	0	0	0	0	0	0	0	0	0	0	0	0	0	0	0	0	0	0	0	0	0	0	0	0	0	0	0	0	0	0	0	0	0	0	0	0	0	0	0	0	0	0	0	0	0	0	0
Cl	0	0	0	0	0	0	0	0	0	0	0	0	0	0	0	0	0	0	0	0	0	0	0	0	0	0	0	0	0	0	0	0	0	0	0	0	0	0	0	0	0	0	0	0	0	0	0	0	0
F	0	0	0	0	0	0	0	0	0	0	0	0	0	0	0	0	0	0	0	0	0	0	0	0	0	0	0	0	0	0	0	0	0	0	0	0	0	0	0	0	0	0	0	0	0	0	0	0	0
Total cations (S)	8	8	8	8	8	8	8	8	8	8	8	8	8	8	8	8	8	8	8	8	8	8	8	8	8	8	8	8	8	8	8	8	8	8	8	8	8	8	8	8	8	8	8	8	8	8	8	8	8
Xfe2+	0.865314	0.862202	0.860818	0.860219	0.865044	0.86126	0.863886	0.863669	0.86652	0.858773	0.860914	0.866511	0.868664	0.864397	0.879791	0.865347	0.873304	0.873138	0.882161	0.879811	0.880584	0.877396	0.881802	0.871683	0.893304	0.883595	0.899058	0.886817	0.896594	0.894637	0.921087	0.900959	0.888974	0.886983	0.888971	0.891796	0.891444	0.891125	0.893423	0.889291	0.888176	0.880674	0.881847	0.879206	0.883414	0.882965	0.88848	0.898552	0.903383
Xfe(tot.)	0.869893	0.869009	0.868176	0.867866	0.871076	0.866717	0.868326	0.869931	0.871908	0.867498	0.86863	0.873454	0.87444	0.872923	0.885925	0.874169	0.878916	0.879868	0.886327	0.884443	0.885448	0.883092	0.886732	0.877761	0.898053	0.889245	0.902412	0.893144	0.900214	0.900328	0.923455	0.904479	0.89748	0.891786	0.893531	0.896154	0.895787	0.895532	0.898344	0.89384	0.893323	0.885371	0.885587	0.8854	0.887854	0.889224	0.894615	0.901706	0.908123
fe3+/(fe3+ + fe2+)	0.039081	0.056843	0.0608955	0.063039	0.0513065	0.045374	0.0375681	0.0527963	0.0462954	0.0712165	0.0638613	0.0595478	0.050297	0.0720291	0.0575947	0.0749511	0.0503926	0.0602942	0.0398865	0.0435753	0.0459979	0.0526092	0.0470438	0.0539635	0.0495547	0.0545804	0.0368219	0.0625974	0.0388872	0.0599876	0.0324957	0.0392854	0.0853702	0.0476517	0.0459641	0.0449395	0.0446561	0.0451997	0.0514001	0.0459699	0.0515282	0.0444556	0.0357409	0.0579152	0.0428984	0.0601406	0.0614919	0.0344823	0.0540222
Xfe2 (C Zn etc)	0.773247	0.769464	0.767571	0.765254	0.771766	0.768005	0.769987	0.769408	0.770728	0.761164	0.763141	0.767676	0.768992	0.762808	0.773894	0.760678	0.766107	0.761953	0.768945	0.767974	0.768325	0.765074	0.767929	0.764116	0.776798	0.769519	0.781779	0.769129	0.77921	0.77274	0.792801	0.78018	0.766635	0.770487	0.770546	0.77324	0.772312	0.77264	0.774977	0.772305	0.771252	0.770597	0.769942	0.766934	0.769497	0.766625	0.769345	0.780913	0.780532
Xfe2+ (almandine)	0.773247	0.769464	0.767571	0.765254	0.771766	0.768005	0.769987	0.769408	0.770728	0.761164	0.763141	0.767676	0.768992	0.762808	0.773894	0.760678	0.766107	0.761953	0.768945	0.767974	0.768325	0.765074	0.767929	0.764116	0.776798	0.769519	0.781779	0.769129	0.77921	0.77274	0.792801	0.78018	0.766635	0.770487	0.770546	0.77324	0.772312	0.77264	0.774977	0.772305	0.771252	0.770597	0.769942	0.766934	0.769497	0.766625	0.769345	0.780913	0.780532
Xmg (pyrope)	0.120356	0.122976	0.124105	0.12435	0.120403	0.123717	0.121319	0.121452	0.118724	0.125175	0.12329	0.118263	0.116266	0.119666	0.10574	0.118366	0.111144	0.110708	0.102715	0.104911	0.104192	0.106909	0.102935	0.112482	0.0927802	0.101376	0.0877749	0.0981631	0.089868	0.0910068	0.0679221	0.0857637	0.0957471	0.098173	0.0962384	0.0938194	0.0940483	0.0943985	0.0924479	0.0961454	0.0971032	0.104411	0.103159	0.105369	0.101552	0.101614	0.0965665	0.0881665	0.0834779
Xmn (spessartine)	0.0821376	0.0830271	0.0832688	0.0861084	0.0829785	0.0841734	0.0846443	0.0844329	0.0859592	0.0881678	0.0882697	0.0893518	0.0899232	0.0922368	0.095368	0.0960594	0.0979546	0.10187	0.102786	0.102551	0.102242	0.102759	0.104217	0.099076	0.105123	0.104576	0.105832	0.10707	0.105756	0.111553	0.114638	0.11035	0.112847	0.106868	0.10756	0.108067	0.108165	0.107094	0.108131	0.106684	0.105955	0.103494	0.102269	0.102884	0.103864	0.106354	0.108705	0.106059	0.110201
Xfe3+ (andradite)	0.046201	0.0676774	0.0724522	0.0751852	0.0611835	0.0537985	0.0442096	0.0628788	0.0547609	0.0847915	0.0756113	0.0709791	0.0594849	0.0860903	0.0688074	0.0896409	0.0594237	0.0713987	0.0468292	0.0514243	0.0542267	0.0622631	0.0554162	0.0635358	0.059081	0.0649111	0.0438864	0.0747189	0.046227	0.0721253	0.039239	0.0470345	0.103225	0.0565387	0.0542348	0.0532929	0.0528722	0.0537908	0.061363	0.054645	0.0613071	0.0526644	0.0418165	0.0687597	0.0506647	0.0715957	0.0733534	0.0410302	0.0649891
Xca (grossular)	-0.0219415	-0.0431445	-0.047397	-0.0508968	-0.0363313	-0.0296939	-0.0201601	-0.038172	-0.0301716	-0.0592978	-0.0503116	-0.0462701	-0.0346667	-0.0608016	-0.0438089	-0.064744	-0.0346286	-0.0459294	-0.0212756	-0.0268608	-0.0289863	-0.0370042	-0.0304959	-0.0392096	-0.033782	-0.0403831	-0.0192726	-0.0490808	-0.0210616	-0.0474249	-0.0146001	-0.0233284	-0.0784535	-0.0320668	-0.0285794	-0.0284196	-0.027397	-0.0279233	-0.0369188	-0.0297801	-0.0356169	-0.0311666	-0.0171873	-0.0439478	-0.0255785	-0.046189	-0.0479706	-0.0161692	-0.0392007
[truncated: 50 more columns]

## Sheet: Table S3
Table S3 - Mineral chemistry of biotite plagioclase and K feldspar from samples MM31 (large garnet) and MM30 (small garnet) obtained by EPMA
Sample MM31									bt in grt	bt in grt
ID number	100 / 1 .	101 / 1 .	102 / 1 .	103 / 1 .	104 / 1 .	105 / 1 .	106 / 1 .	107 / 1 .	108 / 1 .	109 / 1 .	110 / 1 .	111 / 1 .	112 / 1 .	113 / 1 .	114 / 1 .	115 / 1 .	116 / 1 .	117 / 1 .	118 / 1 .	119 / 1 .	120 / 1 .	121 / 1 .	122 / 1 .	123 / 1 .	124 / 1 .	125 / 1 .	126 / 1 .	127 / 1 .	128 / 1 .	129 / 1 .
Analysis No.	100	101	102	103	104	105	106	107	108	109	110	111	112	113	114	115	116	117	118	119	120	121	122	123	124	125	126	127	128	129
Mineral	bt	bt	bt	bt	bt	bt	bt	bt	bt	bt	kfs	kfs	kfs	kfs	kfs	kfs	kfs	kfs	kfs	kfs	pl	pl	pl	pl	pl	pl	pl	pl	pl	pl
SiO2	35.1744	35.2799	35.1893	35.0533	34.7082	34.9424	34.6307	34.9996	34.7565	35.1175	64.7428	64.8703	64.9326	65.4068	65.2046	64.5086	65.0375	64.6775	64.8667	64.8098	63.1094	67.2727	62.842	63.4108	62.5185	61.8952	65.4658	62.6966	63.4228	65.4634
TiO2	2.5322	2.4457	2.5746	2.6708	2.284	2.1394	1.8416	1.8926	2.3263	2.7878	0	0	0.0078	0.0075	0.007	0.0067	0.0054	0.0047	0.0019	0	0.0225	0	0.0295	0	0	0.0154	0.0187	0.0318	0	0.0229
Al2O3	19.5882	20.1164	19.5306	19.7772	19.7631	20.2364	19.863	20.3479	19.1112	19.091	18.6823	18.7894	18.6568	19.014	18.6059	18.6315	18.6533	18.6623	18.637	18.9546	23.3245	20.2802	23.6	23.5892	22.7427	23.3572	20.7533	23.6428	23.1071	22.0668
Cr2O3	0.0275	0.0226	0.0215	0.0147	0.0232	0.0222	0.0014	0.0074	0.0132	0.0033	0	0	0	0.01	0.004	0	0.0013	0	0	0.0035	0	0.0024	0	0.0049	0	0	0	0.003	0	0.0068
FeO	22.2947	22.3926	22.6957	22.1846	22.2802	22.1828	21.6963	21.2056	23.2875	22.6891	0.0242	0.0208	0.0119	0.0254	0.015	0.0164	0.0095	0.008	0.0225	0.0076	0.0224	0.0146	0.0047	0.0268	0.0172	0.0085	0.0331	0.0586	0.1974	0.1023
MnO	0.1426	0.1672	0.1887	0.1644	0.156	0.1217	0.1039	0.1123	0.1246	0.1087	0.0105	0.0027	0.0077	0.0032	0	0.0069	0.0014	0.0032	0.0174	0	0.001	0.0063	0.0174	0.0147	0	0.0077	0.0104	0.0023	0.01	0.0078
MgO	6.6085	6.5479	6.5494	6.5333	6.6849	6.6608	6.8294	6.8498	7.6041	7.2175	0.0073	0	0	0	0	0	0.0099	0	0.0122	0	0	0.0025	0.0085	0.0078	0.0084	0	0.0114	0.029	0.095	0.1246
ZnO	0	0	0	0	0	0	0	0	0	0	0	0	0	0	0	0	0	0	0	0	0	0	0	0	0	0	0	0	0	0
CaO	0.0156	0.0169	0.0355	0.0046	0	0.0051	0.004	0.0092	0.0187	0	0.0626	0.1278	0.0726	0.0681	0.072	0.0313	0.0794	0.0672	0.0617	0.081	4.4542	0.8078	4.6729	4.3936	4.4116	4.7255	1.785	4.5243	1.0704	1.0069
Na2O	0.1476	0.1416	0.1406	0.1622	0.1523	0.1651	0.1391	0.1215	0.1908	0.2294	2.0594	2.0933	2.0253	2.1052	1.5271	1.7695	1.9989	2.0353	1.6198	1.8538	9.1136	11.3627	8.87	8.9743	9.13	8.8694	10.5476	9.0246	9.0396	9.8697
K2O	9.441	9.4195	9.2314	9.4338	9.5202	9.3908	9.3379	9.4023	8.2753	9.2287	13.8802	14.0241	13.7524	13.7691	14.5448	14.2298	13.9275	13.9523	14.5859	14.1183	0.2715	0.0663	0.2815	0.2419	0.1939	0.3458	0.2481	0.2478	2.3067	1.3967
NiO	0	0	0	0	0	0	0	0	0	0	0	0	0	0	0	0	0	0	0	0	0	0	0	0	0	0	0	0	0	0
Cl	0	0	0	0	0	0	0	0	0	0	0	0	0	0	0	0	0	0	0	0	0	0	0	0	0	0	0	0	0	0
F	0	0	0	0	0	0	0	0	0	0	0	0	0	0	0	0	0	0	0	0	0	0	0	0	0	0	0	0	0	0
Total	95.9723	96.5503	96.1573	95.9989	95.5721	95.8667	94.4473	94.9482	95.7082	96.473	99.4693	99.9284	99.4671	100.409	99.9804	99.2007	99.7241	99.4105	99.8251	99.8286	100.319	99.8155	100.326	100.664	99.0223	99.2247	98.8734	100.261	99.249	100.068
No. Oxygens	11	11	11	11	11	11	11	11	11	11	8	8	8	8	8	8	8	8	8	8	8	8	8	8	8	8	8	8	8	8
Si	2.69415	2.68349	2.69245	2.68306	2.67428	2.67592	2.68924	2.6925	2.66967	2.68048	2.98582	2.98107	2.9908	2.98375	2.99513	2.98639	2.99043	2.9856	2.988	2.97933	2.785	2.9515	2.77352	2.78523	2.79463	2.7663	2.90968	2.7698	2.82839	2.8808
Ti	0.145877	0.139916	0.148163	0.153757	0.132362	0.123226	0.107561	0.109507	0.134394	0.160045	0	0	0.000270216	0.000257331	0.00024184	0.000233289	0.000186748	0.00016318	6.5827e-05	0	0.000746803	0	0.000979255	0	0	0.000517673	0.00062512	0.00105663	0	0.000757951
Al	1.76815	1.80324	1.76109	1.78401	1.79457	1.82635	1.81779	1.84477	1.72997	1.7173	1.01539	1.01758	1.01273	1.02222	1.00721	1.0165	1.01078	1.01525	1.01173	1.02689	1.21304	1.04859	1.22751	1.22107	1.19809	1.23025	1.08704	1.23093	1.21442	1.14441
Cr	0.00166523	0.00135902	0.00130053	0.000889536	0.00141321	0.00134406	8.59491e-05	0.000450059	0.000801568	0.000199135	0	0	0	0.000360648	0.000145259	0	4.72561e-05	0	0	0.000127201	0	8.32453e-05	0	0.000170153	0	0	0	0.000104778	0	0.000236574
Fe2+	1.42791	1.42423	1.45206	1.41989	1.43548	1.42049	1.40883	1.3641	1.49571	1.44813	0.000933235	0.000799269	0.000458326	0.000968894	0.000576145	0.000634856	0.000365255	0.000308796	0.000866651	0.000292142	0.000826576	0.000535623	0.000173453	0.00098432	0.000642906	0.000317662	0.00123016	0.00216474	0.00736114	0.00376437
Mn2+	0.00925026	0.0107708	0.0122278	0.0106572	0.0101798	0.00789312	0.00683318	0.00731663	0.00810547	0.00702679	0.00041011	0.000105082	0.000300368	0.000123631	0	0.00027053	5.45175e-05	0.000125103	0.000678808	0	3.73741e-05	0.00023409	0.000650384	0.000546833	0	0.000291456	0.000391473	8.60539e-05	0.000377688	0.000290702
Mg	0.754611	0.742506	0.747073	0.745519	0.767881	0.76045	0.790635	0.785589	0.870751	0.821297	0.000501903	0	0	0	0	0	0.000678624	0	0.000837806	0	0	0.000163519	0.000559276	0.000510761	0.000559784	0	0.00075537	0.00190997	0.00631601	0.00817442
Zn	0	0	0	0	0	0	0	0	0	0	0	0	0	0	0	0	0	0	0	0	0	0	0	0	0	0	0	0	0	0
Ca	0.00128009	0.00137715	0.00290996	0.000377208	0	0.000418419	0.000332775	0.000758233	0.00153881	0	0.00309292	0.00629187	0.00358248	0.00332819	0.00354317	0.00155237	0.00391122	0.0033233	0.00304485	0.00398919	0.210583	0.037969	0.220948	0.206748	0.211268	0.226263	0.0849944	0.21413	0.0511402	0.0474703
Na	0.0219175	0.0208807	0.020856	0.0240691	0.0227501	0.0245118	0.0209413	0.0181208	0.0284124	0.0339461	0.184129	0.186495	0.180852	0.186183	0.135992	0.158813	0.178184	0.182144	0.144653	0.165215	0.779705	0.966481	0.758951	0.764201	0.791216	0.768503	0.90885	0.772931	0.781542	0.842028
K	0.922407	0.913923	0.900977	0.92108	0.935684	0.917342	0.924968	0.922648	0.810801	0.898541	0.816539	0.822074	0.808002	0.801224	0.852225	0.840303	0.816868	0.821548	0.85704	0.827883	0.0152831	0.00371044	0.0158478	0.0135532	0.0110561	0.0197141	0.0140659	0.0139642	0.131218	0.0784018
Ni	0	0	0	0	0	0	0	0	0	0	0	0	0	0	0	0	0	0	0	0	0	0	0	0	0	0	0	0	0	0
Cl	0	0	0	0	0	0	0	0	0	0	0	0	0	0	0	0	0	0	0	0	0	0	0	0	0	0	0	0	0	0
F	0	0	0	0	0	0	0	0	0	0	0	0	0	0	0	0	0	0	0	0	0	0	0	0	0	0	0	0	0	0
Total Cations (S)	7.74722	7.7417	7.73911	7.74331	7.77459	7.75794	7.76721	7.74576	7.75016	7.76697	5.00682	5.01442	4.99699	4.99841	4.99506	5.00469	5.0015	5.00846	5.00692	5.00372	5.00522	5.00926	4.99914	4.99302	5.00746	5.01216	5.00763	5.00708	5.02077	5.00633
Xmg (mg/(fe+mg))	0.345752	0.342684	0.339713	0.344285	0.348505	0.34868	0.359468	0.365443	0.367955	0.361895
Xab											0.183439	0.183764	0.18223	0.187924	0.137122	0.158707	0.178369	0.180875	0.143971	0.165697	0.775385	0.958658	0.762193	0.776231	0.780646	0.757534	0.901717	0.772139	0.810812	0.869953
XK											0.81348	0.810036	0.81416	0.808716	0.859306	0.839741	0.817716	0.815825	0.852998	0.830302	0.0151984	0.00368041	0.0159155	0.0137666	0.0109084	0.0194327	0.0139555	0.0139499	0.136133	0.081002
Xan											0.00308133	0.00619974	0.00360978	0.00335931	0.00357261	0.00155133	0.00391528	0.00330015	0.00303049	0.00400084
Sample MM30
ID number	210 / 1 .	211 / 1 .	212 / 1 .	213 / 1 .	214 / 1 .	215 / 1 .	216 / 1 .	217 / 1 .	218 / 1 .	219 / 1 .	220 / 1 .	221 / 1 .	222 / 1 .	223 / 1 .	224 / 1 .	225 / 1 .	226 / 1 .	227 / 1 .	228 / 1 .	229 / 1 .	230 / 1 .	231 / 1 .	232 / 1 .	233 / 1 .	234 / 1 .	235 / 1 .	236 / 1 .	237 / 1 .	238 / 1 .	239 / 1 .
Analysis No.	210	211	212	213	214	215	216	217	218	219	220	221	222	223	224	225	226	227	228	229	230	231	232	233	234	235	236	237	238	239
Mineral	bt	bt	bt	bt	bt	bt	bt	bt	bt	bt	kfs	kfs	kfs	kfs	kfs	kfs	kfs	kfs	kfs	kfs	pl	pl	pl	pl	pl	pl	pl	pl	pl	pl
SiO2	34.4393	34.3713	35.017	35.3188	34.8992	34.7609	34.5907	34.6533	34.4985	34.5885	64.1466	63.9495	64.509	64.5194	63.6173	64.4537	65.175	64.9974	64.4029	64.2159	62.7785	62.202	62.014	63.0018	63.1774	62.7618	64.2004	63.1364	62.9317	62.5059
TiO2	2.8601	2.879	2.8508	2.4973	2.4744	2.5585	2.4321	2.5872	2.6194	2.638	0.0173	0.0067	0	0	0	0.0145	0.02	0.0031	0.0117	0.0119	0.0165	0	0.0038	0.0081	0	0	0	0	0.0068	0
Al2O3	19.3001	19.545	19.458	20.1144	19.6697	20.0952	19.1964	19.8228	19.6186	19.5007	18.3762	18.6595	18.602	18.8751	18.2094	18.935	18.8155	19.0333	18.3978	18.877	23.248	23.4701	23.1539	23.7628	23.4062	23.2672	22.9256	23.3807	23.2034	23.6503
Cr2O3	0.0194	0.0156	0.0172	0.0228	0.0122	0.0261	0.0263	0.0147	0.0193	0.0251	0.0063	0	0.0053	0.0007	0.0059	0	0	0	0	0	0.0048	0.0032	0	0.0004	0	0.0012	0.0064	0	0	0
FeO	22.2647	22.3878	22.0482	21.9456	22.1121	22.0888	22.5264	22.7442	22.7417	22.5492	0.0125	0.0049	0.0206	0.0088	0.0159	0.0052	0.0154	0.0127	0.0169	0	0.0087	0.0207	0.0072	0.0095	0	0	0.0076	0.0156	0.0102	0.0062
MnO	0.1188	0.1484	0.1365	0.1478	0.1336	0.1201	0.1517	0.1275	0.146	0.1506	0	0	0.0079	0	0.0024	0.0008	0.0002	0	0.0048	0	0.0082	0.0006	0.0045	0.0045	0.0017	0	0	0.0057	0	0
MgO	6.7113	6.7037	6.7946	7.0284	6.9819	6.8343	6.8282	6.6068	6.6037	6.7084	0	0	0	0.0032	0.0067	0	0	0	0	0	0	0.0099	0.0385	0.0074	0.002	0	0	0	0	0
ZnO	0	0	0	0	0	0	0	0	0	0	0	0	0	0	0	0	0	0	0	0	0	0	0	0	0	0	0	0	0	0
CaO	0	0.0027	0.0172	0.004	0.0029	0.0062	0.0566	0.0242	0	0.0015	0.0556	0.2732	0.0584	0.085	0.0911	0.0519	0.0575	0.0519	0.0437	0.0362	4.7798	4.6159	4.6482	4.5919	4.5	4.2975	4.063	4.3413	4.3273	4.5676
Na2O	0.145	0.1543	0.186	0.1931	0.1345	0.185	0.1414	0.1474	0.1413	0.1301	1.9875	1.3284	1.9272	1.7907	1.2045	2.0853	1.7044	1.6473	1.4595	1.4866	8.7745	8.6227	8.8145	8.8332	8.8502	9.0493	9.096	9.1586	9.0338	8.9103
K2O	9.5359	9.4462	9.4253	9.4027	9.4486	9.4024	9.2284	9.4309	9.4859	9.5839	14.0154	14.8353	14.0909	14.2075	14.8647	14.0422	14.2765	14.6903	14.6987	14.6597	0.3882	0.6817	0.3918	0.3509	0.4382	0.3959	0.4603	0.1613	0.3261	0.3405
NiO	0	0	0	0	0	0	0	0	0	0	0	0	0	0	0	0	0	0	0	0	0	0	0	0	0	0	0	0	0	0
Cl	0	0	0	0	0	0	0	0	0	0	0	0	0	0	0	0	0	0	0	0	0	0	0	0	0	0	0	0	0	0
F	0	0	0	0	0	0	0	0	0	0	0	0	0	0	0	0	0	0	0	0	0	0	0	0	0	0	0	0	0	0
Total	95.3946	95.654	95.9508	96.6749	95.8691	96.0775	95.1782	96.159	95.8744	95.876	98.6174	99.0575	99.2213	99.4904	98.0179	99.5886	100.065	100.436	99.036	99.2873	100.007	99.6268	99.0764	100.57	100.376	99.7729	100.759	100.2	99.8393	99.9808
No. Oxygens	11	11	11	11	11	11	11	11	11	11	8	8	8	8	8	8	8	8	8	8	8	8	8	8	8	8	8	8	8	8
Si	2.66282	2.65025	2.68178	2.67713	2.67562	2.65778	2.67893	2.65788	2.65721	2.66305	2.98796	2.97542	2.98567	2.97828	2.9902	2.97296	2.98842	2.97679	2.99199	2.97555	2.78131	2.76964	2.77459	2.7731	2.78598	2.78502	2.81573	2.78665	2.7892	2.76923
Ti	0.166326	0.166965	0.164211	0.142372	0.142682	0.147131	0.141669	0.14925	0.151747	0.152761	0.000606093	0.000234465	0	0	0	0.000503039	0.000689735	0.000106784	0.000408821	0.000414729	0.000549813	0	0.000127875	0.000268157	0	0	0	0	0.000226679	0
Al	1.75864	1.77606	1.75619	1.7968	1.7772	1.81072	1.75207	1.79179	1.78083	1.76941	1.00876	1.02315	1.01464	1.02682	1.00867	1.02929	1.01673	1.0273	1.00728	1.03083	1.21382	1.23158	1.22085	1.23265	1.2164	1.21677	1.18496	1.21616	1.21197	1.23482
Cr	0.00118586	0.000950956	0.0010414	0.00136629	0.000739458	0.00157766	0.00161029	0.00089136	0.00117524	0.0015278	0.000231999	0	0.000193929	2.55457e-05	0.000219241	0	0	0	0	0	0.000168122	0.000112646	0	1.39193e-05	0	4.20977e-05	0.000221911	0	0	0
Fe2+	1.43948	1.44346	1.41195	1.39096	1.41756	1.41222	1.4588	1.4587	1.46471	1.45171	0.000486872	0.000190638	0.000797245	0.000339673	0.00062492	0.000200562	0.000590452	0.000486361	0.000656516	0	0.000322301	0.000770713	0.000269368	0.000349654	0	0	0.000278721	0.000575746	0.000378019	0.000229685
Mn2+	0.00777932	0.00969089	0.0088535	0.00948803	0.00867469	0.00777695	0.00995008	0.00828209	0.00952395	0.00981998	0	0	0.000309662	0	9.55376e-05	3.12515e-05	7.76657e-06	0	0.000188858	0	0.000307675	2.26261e-05	0.000170514	0.00016775	6.34899e-05	0	0	0.000213067	0	0
Mg	0.773603	0.770603	0.775769	0.794227	0.798008	0.779017	0.788376	0.755452	0.758294	0.77	0	0	0	0.000220217	0.000469488	0	0	0	0	0	0	0.000657172	0.002568	0.000485589	0.000131484	0	0	0	0	0
Zn	0	0	0	0	0	0	0	0	0	0	0	0	0	0	0	0	0	0	0	0	0	0	0	0	0	0	0	0	0	0
Ca	0	0.000223037	0.00141122	0.000324822	0.000238193	0.000507857	0.00469613	0.00198851	0	0.000123726	0.00277459	0.013618	0.00289572	0.00420355	0.00458738	0.00256467	0.00282456	0.00254648	0.002175	0.00179703	0.226867	0.22019	0.222801	0.216534	0.212594	0.204301	0.190907	0.205279	0.205471	0.216794
Na	0.0217352	0.0230656	0.0276163	0.0283762	0.0199912	0.0274225	0.0212305	0.0219178	0.0210997	0.0194193	0.17948	0.119825	0.172925	0.160253	0.109759	0.186474	0.15151	0.146262	0.131452	0.133545	0.75365	0.744339	0.764567	0.75377	0.756621	0.778495	0.773414	0.783684	0.776229	0.765313
K	0.940497	0.929089	0.920763	0.909127	0.924028	0.917013	0.91167	0.922685	0.931994	0.941235	0.832753	0.880474	0.831896	0.836569	0.891229	0.826201	0.835009	0.858206	0.87105	0.866482	0.0219383	0.0387188	0.0223606	0.0197017	0.0246489	0.0224092	0.0257515	0.00908127	0.0184362	0.0192426
Ni	0	0	0	0	0	0	0	0	0	0	0	0	0	0	0	0	0	0	0	0	0	0	0	0	0	0	0	0	0	0
Cl	0	0	0	0	0	0	0	0	0	0	0	0	0	0	0	0	0	0	0	0	0	0	0	0	0	0	0	0	0	0
F	0	0	0	0	0	0	0	0	0	0	0	0	0	0	0	0	0	0	0	0	0	0	0	0	0	0	0	0	0	0
Total Cations (S)	7.77206	7.77036	7.74959	7.75017	7.76474	7.76116	7.76901	7.76883	7.77659	7.77905	5.01305	5.01292	5.00932	5.00671	5.00585	5.01823	4.99578	5.01169	5.00521	5.00863	4.99894	5.00604	5.00831	4.99704	4.99645	5.00703	4.99126	5.00165	5.00192	5.00563
Xmg (mg/(fe+mg))	0.349558	0.348049	0.354601	0.36346	0.360182	0.355514	0.350829	0.341193	0.341112	0.346579
Xab											0.176827	0.118181	0.1716	0.160089	0.10915	0.183675	0.153142	0.145244	0.13084	0.133302	0.751804	0.741929	0.757201	0.761379	0.761292	0.774464	0.781169	0.785219	0.776124	0.764281
XK											0.82044	0.868388	0.825526	0.835712	0.886288	0.813799	0.844003	0.852228	0.866995	0.864904	0.0218846	0.0385934	0.0221451	0.0199006	0.0248011	0.0222932	0.0260098	0.00909907	0.0184337	0.0192167
Xan											0.00273356	0.0134311	0.00287354	0.00419924	0.00456194	0.00252617	0.00285498	0.00252875	0.00216487	0.00179376

## Sheet: Table S4
Table S4 - Garnet Lu-Hf data, points labelled "JonEBig" are from sample MM31, while "JonESml" are MM30. The textural location of spots are indicated as core or rim for MM31, the numbers next to MM30 samples indicate which of the small garnet grains the spot comes from
		"Inverse" isochron ratios
		Uncorrected		Matrix-corrected								Elemental concentrations (ppm)															average lu small grains	3.75332
		176Lu/176Hf	± 2σ	176Lu/176Hf	± 2σ	177Hf/176Hf	± 2σ	Rho				27Al	43Ca	47Ti->113	57Fe	88Sr	89Y->172	90Zr->173	140Ce->155	172Yb	175Lu->257	176Hf	178Hf	238U	175Lu		average lu rim	21.0403
JonEBig-001		18.9681	0.285602	19.5303	0.2856	1.10857	0.020688	0.433964		core		120000	6256.1	62.8369	289962	0.00177412	297.421	18.4962	0.0235871	177.191	34.775	0.865736	0.271248	0.0158844	36.4463		average lu core	37.7914
JonEBig-002		19.0083	0.282095	19.5717	0.28209	1.1045	0.0202856	0.569408		core		120000	6215.31	61.0603	290664	0.0156453	288.898	18.3895	0.0889203	176.263	36.5746	0.87363	0.27249	0.0324315	36.8508			34.576
JonEBig-003		9.84621	0.297301	10.138	0.2973	2.2281	0.0776734	0.60536		core		120000	6168.03	26.7644	290663	0.0182568	162.307	6.75514	0.157484	32.4423	2.91204	0.184159	0.115949	0.0190958	4.02667
JonEBig-004		18.2459	0.287214	18.7867	0.28721	1.19789	0.0231593	0.425003		core		120000	6358.86	70.9721	290995	0.0040553	329.331	18.8753	0.0232589	171.784	31.3235	0.788814	0.267136	0.0164354	31.9572
JonEBig-005		20.2193	0.291794	20.8186	0.29179	0.938233	0.0172728	0.224532		core		120000	6314.54	79.4422	289979	0.00159966	519.739	17.7897	0.0144871	243.544	39.1975	0.964524	0.255651	0.0209889	43.2409			17.7276
JonEBig-006		21.1715	0.291486	21.799	0.29149	0.896173	0.015766	0.405819		core		120000	6368.6	61.5584	287767	0.00505783	563.108	19.1154	0.0283869	281.66	45.6784	1.07466	0.272022	0.0181031	50.5036
JonEBig-007		19.8506	0.299159	20.4389	0.29916	1.02718	0.0195037	0.581695		core		120000	6122.22	61.2819	288953	0.00235195	306.867	16.9852	0.00611676	192.959	38.3746	0.865884	0.251057	0.0146816	38.1158
JonEBig-008		18.0691	0.288096	18.6047	0.2881	1.22959	0.0240016	0.43435		core		120000	6141.66	48.4526	288925	0.00772216	241.236	15.8493	0.129752	145.29	29.1546	0.735221	0.254969	0.051717	29.4616			3.62978
JonEBig-009		18.3427	0.276899	18.8864	0.2769	1.17182	0.0216822	0.357313		core		120000	6180.79	58.1244	289372	0.0244934	492.615	19.7457	0.104242	206.049	33.819	0.861259	0.285277	0.0237272	35.0785
JonEBig-010		19.3273	0.294138	19.9001	0.29414	1.10674	0.0209229	0.632198		core		120000	6246.02	74.3006	290804	0.00742095	274.843	17.6991	0.0444047	171.919	35.1734	0.848419	0.264959	0.0191236	36.385
JonEBig-011		18.8546	0.284507	19.4134	0.28451	1.12185	0.0209299	0.403318		core		120000	6238.02	61.7468	290087	0.00138695	270.138	17.3869	0.0559384	166.967	31.5923	0.835782	0.264732	0.0168665	34.9519
JonEBig-012		12.9253	0.25619	13.3084	0.25619	1.83774	0.0424884	0.41561		core		120000	6240.72	52.5814	291753	0.00540496	231.843	15.3764	0.0354416	80.8509	11.8082	0.458503	0.23768	0.0118427	13.1412
JonEBig-013		19.7495	0.457341	21.6297	0.40763	0.869457	0.0204693	0.237952		core		120000	6191.82	88.7409	300998	0.020569	647.553	22.9227	0.0770064	318.01	56.2531	1.29655	0.318845	0.0871777	60.5141
JonEBig-014		22.3795	0.273359	23.0429	0.27336	0.700673	0.0115002	0.547514		core		120000	6143.87	63.8877	296593	0.00323809	756.758	20.9138	0.0135433	377.612	71.4224	1.44823	0.285895	0.0148853	71.8665
JonEBig-015		21.5901	0.281284	22.2301	0.28128	0.788078	0.0138349	0.479567		core		120000	6055.34	82.4989	296457	0.0301464	669.85	21.5082	0.134253	330.909	63.0304	1.32519	0.294381	0.095973	63.4145
JonEBig-016		20.788	0.286209	21.4041	0.28621	0.891736	0.0163323	0.383439		core		120000	6196.95	65.6403	291261	0.00104031	441.945	18.3925	0.00563944	251.506	47.9756	1.06556	0.267965	0.0141447	49.145
JonEBig-017		19.7046	0.282833	20.2886	0.28283	1.03554	0.0185402	0.455122		core		120000	6247.86	79.9389	292891	0.0109152	304.311	19.2197	0.096131	208.281	42.0935	0.971674	0.284113	0.0654932	42.5139
JonEBig-018		12.264	0.231387	12.6275	0.23139	1.99055	0.0431102	0.494744		core		120000	6453.42	66.4015	290989	0.0118897	567.129	21.2679	0.0799356	104.368	12.9574	0.521536	0.292881	0.0451611	14.1993
JonEBig-019		10.4716	0.254876	10.782	0.25488	2.12484	0.0597484	0.619039		core		120000	6303.71	42.4412	294208	0.000713843	212.676	11.9298	0.0142869	50.8647	6.61728	0.297312	0.1785	0.011155	6.90865
JonEBig-020		14.5938	0.326587	15.0264	0.32659	1.73537	0.0461157	0.460674		core		120000	6408.35	46.7971	290033	0.00621097	285.609	11.4437	0.0746279	77.2018	9.03612	0.350881	0.171782	0.0281931	11.3501
JonEBig-021		14.3901	0.366553	14.8167	0.36655	1.72203	0.0420834	0.187703		core		120000	6362.63	40.56	289256	0.00677596	325.348	13.6965	0.0847823	88.8453	12.4363	0.406059	0.197119	0.0239318	12.9511
JonEBig-022		22.0766	0.294484	22.7309	0.29448	0.777201	0.0134746	0.399797		core		120000	6407.07	76.4201	297819	0.00440852	837.644	21.2253	0.0666236	370.043	67.2164	1.35521	0.297058	0.0834924	66.2668
JonEBig-023		19.4697	0.296137	20.0468	0.29614	1.09884	0.0207754	0.292303		core		120000	6221.4	66.4115	293043	0.00494417	264.753	16.3081	0.0559972	169.759	36.0262	0.833845	0.258505	0.0282467	35.996
JonEBig-024		21.1072	0.291199	21.7329	0.2912	0.88194	0.0156152	0.556594		core		120000	6227.68	73.4023	291273	0.00215468	515.686	17.813	0.000263615	266.306	46.4747	1.06185	0.263947	0.0189622	49.7243
JonEBig-025		14.1515	0.257332	14.571	0.25733	1.7233	0.0366494	0.490469		core		120000	6319.99	60.0224	291970	0.00423238	354.812	18.6829	0.065012	118.726	17.8174	0.571483	0.278088	0.0239641	17.957
JonEBig-026		17.621	0.328027	18.1432	0.32803	1.291	0.0372166	-0.326877		core		120000	6264.96	69.9814	293391	0.0149711	621.912	24.3522	0.107658	242.765	36.1808	0.994486	0.362333	0.292486	38.9146
JonEBig-027		18.6984	0.283763	19.2691	0.29283	1.1015	0.0218019	0.440653		core		120000	6313.56	60.7529	294149	0.00162707	326.024	18.9187	0.0146987	185.808	34.6431	0.889187	0.27633	0.0149763	36.8449
JonEBig-028		20.2289	0.291634	20.8285	0.29163	0.93782	0.018586	0.379227		core		120000	6175.28	69.9551	291600	0.00129246	318.545	17.5257	0.00366307	222.02	40.887	0.990995	0.262153	0.0133972	44.4443
JonEBig-029		19.7864	0.292336	20.3729	0.29234	1.06955	0.0196822	0.466546		core		120000	6311.06	42.9088	293494	0.00152352	401.274	20.912	0.00221139	225.588	33.2374	0.953013	0.287299	0.00976924	41.8572
JonEBig-030		21.2444	0.294932	21.8741	0.29493	0.871566	0.0155809	0.484279		core		120000	6320.2	59.337	293427	0.00110771	315.323	18.9595	0.00368714	241.192	50.1662	1.09826	0.270136	0.0134691	51.7487
JonEBig-031		20.6218	0.292618	21.233	0.29262	0.928825	0.0180068	0.424593		core		120000	6257.07	71.3773	293382	0.00370485	293.616	18.9651	0.00953671	224.992	40.7327	1.05602	0.276619	0.0124868	48.3025
JonEBig-032		21.2891	0.373172	21.9201	0.37317	0.86604	0.0209584	0.639368		core		120000	6220.24	82.3399	295767	0.00999143	328.235	19.893	0.0517282	253.113	55.8091	1.14788	0.280542	0.0197315	54.2474
JonEBig-032		20.9869	0.409834	21.6089	0.40983	0.843677	0.0218467	0.232447	copy	core
JonEBig-033		17.6225	0.30855	18.1278	0.31578	1.26224	0.0279133	0.532088		rim		120000	6279.44	85.5683	294262	0.00119665	477.445	16.7394	0.00396593	154.322	22.6522	0.631038	0.224379	0.0153784	24.6605
JonEBig-034		17.3432	0.299269	17.8572	0.29927	1.31231	0.0301337	0.560834		rim		120000	6257.45	81.5487	293717	0.00518745	435.602	16.7792	0.0674213	150.032	22.9979	0.638754	0.236075	0.0132042	24.5585
JonEBig-035		18.28	0.314861	18.8219	0.31486	1.25847	0.0266487	0.601519		rim		120000	6215.46	84.1147	293007	0.000715742	409.985	16.0804	0.00215576	153.595	24.3703	0.639364	0.226984	0.017138	25.9124
JonEBig-036		17.6354	0.301369	18.1581	0.30137	1.31701	0.0273971	0.42454		rim		120000	6224.74	67.5672	293264	0.000495525	351.726	14.9347	0.00597066	141.831	21.8701	0.618001	0.229665	0.0137384	24.1664
JonEBig-037		14.2031	0.276121	14.624	0.27612	1.73289	0.0395884	0.400179		rim		120000	6257.77	71.4175	296195	0.00185245	253.839	14.4768	0.00434462	93.4161	14.8112	0.475487	0.232287	0.00917255	14.9848
JonEBig-038		14.6247	0.276496	15.0581	0.2765	1.70085	0.0378025	0.528064		rim		120000	6179.4	75.4653	292790	0.000495618	271.101	15.3792	0.00204431	98.5782	15.0951	0.487944	0.233945	0.00742962	15.8269
JonEBig-039		15.8814	0.289295	16.3521	0.2893	1.50296	0.0350299	0.528691		rim		120000	6257.65	78.7532	295591	0.00107862	337.524	15.6646	0.00246969	122.368	18.0474	0.546597	0.231365	0.0113669	19.2532
JonEBig-040		16.698	0.3072	17.1929	0.3072	1.42532	0.0317227	0.626453		rim		120000	6240.06	77.342	297475	0.000908421	363.11	15.6438	0.00439455	129.465	17.0386	0.545622	0.218932	0.0118939	20.201
JonEBig-041		15.5818	0.298629	16.0436	0.29863	1.58962	0.0362983	0.561359		rim		120000	6214.83	76.7036	295124	0.00149535	310.622	14.9366	0.0190667	110.51	13.2688	0.49821	0.22301	0.0158948	17.2212
JonEBig-042		15.1906	0.299029	15.6409	0.29903	1.58743	0.037315	0.527991		rim		120000	6178.83	64.5004	295541	0.000329131	292.226	14.2202	0.00403467	101.98	14.7933	0.468612	0.209574	0.00678688	15.797
JonEBig-043		15.3903	0.310997	15.8465	0.311	1.65255	0.0396847	0.512223		rim		120000	6260.76	61.3243	297407	0.000733659	284.723	14.0519	0.00527065	99.5313	14.0115	0.451226	0.210019	0.0124665	15.4001
JonEBig-044		14.8338	0.30209	15.2734	0.30209	1.62202	0.0394035	0.67829		rim		120000	6179.13	56.5202	297340	0.00134061	267.454	13.5627	0.00105777	94.5229	12.6902	0.44666	0.204014	0.00682379	14.6943
JonEBig-045		15.518	0.265539	15.9779	0.26554	1.52436	0.030932	0.498561		rim		120000	6287.87	69.6719	291466	0.00145612	328.364	16.5997	0.00538129	130.543	17.6232	0.62861	0.270299	0.0128462	21.6508
JonEBig-046		16.6842	0.291624	17.1788	0.29162	1.46966	0.0307346	0.643307		rim		120000	6221.22	77.6736	295031	0.00150874	437.757	17.6841	0.00330385	143.356	20.99	0.619426	0.256609	0.0116753	22.9269
JonEBig-047		18.3434	0.31635	18.8871	0.31635	1.22774	0.0261869	0.482656		rim		120000	6287.79	70.549	297271	0.00317745	329.971	14.7955	0.00430076	143.425	24.536	0.61846	0.21393	0.0122856	25.1819
JonEBig-048		17.8497	0.302476	18.3787	0.30248	1.31905	0.0271901	0.419169		rim		120000	6269.91	72.5046	293622	0.00411339	361.133	15.2256	0.0958542	142.332	24.2732	0.614628	0.228236	0.0381091	24.3174
JonEBig-049		13.8557	0.293404	14.2664	0.2934	1.72611	0.0432747	0.49792		rim		120000	6237.26	53.5688	295199	0.00133486	238.742	12.9602	0.00335271	80.9239	12.2183	0.405906	0.197217	0.00689064	12.4667
JonEBig-050		13.3364	0.275819	13.7829	0.28274	1.72466	0.0450793	0.629371	x	rim		120000	6145.54	51.6663	294725	0.000938697	238.84	13.239	0.00335619	79.1382	12.2396	0.408657	0.198413	0.00867439	12.1296
JonEBig-051		14.7332	0.304824	15.0627	0.30957	1.64926	0.042147	0.437003		rim		120000	6215.5	59.8003	297056	0.000358279	267.047	13.4237	0.00151052	90.2634	13.022	0.427212	0.198477	0.0100406	13.855
JonEBig-052		14.9652	0.293552	15.4088	0.29355	1.60641	0.0375435	0.31381		rim		120000	6220.65	60.1179	296624	0.00195917	277.087	14.055	0.0150531	94.8161	12.8811	0.441656	0.199878	0.0123225	14.6683
JonEBig-053		17.7162	0.440273	18.2414	0.44027	1.31478	0.0410392	0.41772		rim		120000	6449.6	35.7492	294440	0.000522519	191.4	5.6252	0.00475004	67.9923	9.31896	0.27757	0.102785	0.00697174	10.9119
JonEBig-054		16.9627	0.298065	17.4655	0.29806	1.36341	0.0290913	0.583661		rim		120000	6296.91	77.0849	294585	0.0017151	336.951	15.6608	0.00330937	136.693	20.6034	0.612333	0.235122	0.00545495	23.0126
JonEBig-055		17.2271	0.300408	17.7377	0.30041	1.3715	0.0289783	0.573194		rim		120000	6345.09	79.2801	293430	0.000519036	341.491	16.2292	0.00286214	138.201	21.0003	0.608419	0.235203	0.012186	23.2349
JonEBig-056		17.6016	0.304583	18.1234	0.30458	1.37924	0.0293242	0.551304		rim		120000	6174.89	83.5539	290662	0.00194818	418.549	16.3631	0.00340397	140.191	19.8503	0.585696	0.227261	0.0109699	22.8433
JonEBig-057		17.5087	0.293996	18.0276	0.294	1.34917	0.0274142	0.526331		rim		120000	6256.92	77.3899	290580	0.000817981	434.483	16.0862	0.00191838	142.733	20.4982	0.601266	0.228574	0.00609706	23.3322
JonEBig-058		16.7523	0.296219	17.2489	0.29622	1.39782	0.0299969	0.274307		rim		120000	6253.83	70.2801	291487	0.000887979	311.211	14.9708	0.00462141	127.344	19.2017	0.578311	0.227893	0.00857515	21.4464
JonEBig-059		17.4658	0.282416	17.9835	0.28242	1.32676	0.0259185	0.545304		rim		120000	6160.99	51.0424	289519	0.00140632	463.189	16.1977	0.00306224	162.555	24.3497	0.689826	0.257931	0.00692621	26.6985
JonEBig-060		14.5445	0.292141	14.8128	0.30217	1.70174	0.0422226	0.614863		rim		120000	6220.78	63.1994	291162	0.00059758	216.703	12.6318	0.00242195	86.4555	12.7255	0.454518	0.217912	0.00717508	14.4702
JonEBig-061		15.3114	0.326838	15.7787	0.33822	1.59423	0.0422666	0.556346		core		120000	6331.92	50.9862	289507	0.00629047	279.907	16.447	0.101285	109.58	16.7033	0.545626	0.245335	0.02885	18.5588
JonEBig-062		16.4815	0.33784	16.97	0.33784	1.48849	0.0392654	0.552989		core		120000	6476.01	41.0763	289976	0.015301	340.439	16.7349	0.072464	135.75	21.0388	0.595091	0.250071	0.0258538	21.7719
JonEBig-063		21.219	0.335108	21.848	0.33511	0.87312	0.0196761	0.55108		core		120000	6509.34	73.6258	288948	0.0167961	553.248	17.847	0.0728704	285.076	49.1073	1.03986	0.256017	0.0907095	48.8755
JonEBig-064		20.0495	0.345149	20.6437	0.34515	1.03258	0.0227811	0.393213		core		120000	6300.66	67.9554	290754	0.00228864	310.318	17.3826	0.0177998	191.388	37.3325	0.890147	0.259345	0.0128746	39.5506
JonEBig-065		18.7405	0.325197	19.296	0.3252	1.13352	0.0247347	0.290202		core		120000	6389.87	72.1791	290368	0.00461204	343.009	19.056	0.0191829	186.282	34.6796	0.865204	0.276547	0.0186287	35.9198
JonEBig-066		19.5122	0.338678	20.0905	0.33868	1.02714	0.0229106	0.610748		core		120000	6210.84	63.9512	291395	0.00913029	271.547	16.4609	0.0573791	177.298	41.6337	0.874655	0.253262	0.0233382	37.8448
JonEBig-067		18.1461	0.300469	18.6839	0.30047	1.23353	0.0272075	0.313755		core		120000	6353.29	86.2929	295641	0.0118977	483.269	22.196	0.030264	217.553	36.9441	0.93832	0.32667	0.0411449	37.7581
JonEBig-068		20.0023	0.336241	20.5951	0.33624	1.01934	0.0219504	0.371235		core		120000	6342.34	60.0356	292225	0.00713057	373.318	17.9205	0.0648676	209.685	39.0346	0.915766	0.263386	0.0152317	40.5969
JonEBig-069		13.6334	0.366846	14.0375	0.36685	1.79449	0.0575335	0.360492		core		120000	6405.09	37.1254	292574	0.00248704	230.586	10.1603	0.0423525	66.0106	10.2549	0.316932	0.160068	0.025934	9.57202
JonEBig-070		16.5712	0.404331	17.0624	0.40433	1.41417	0.0426513	0.409884		core		120000	6372.67	38.6107	292945	0.0110111	279.023	10.3298	0.0891175	92.3992	14.0654	0.389486	0.155413	0.0159028	14.3199
JonEBig-071		14.1659	0.325148	14.5858	0.32515	1.72377	0.04708	0.442617		rim		120000	6358.51	62.582	296389	0.000486324	265.128	13.8802	0.00490477	89.5993	13.5619	0.440806	0.213792	0.0109792	13.8312
JonEBig-072		14.0099	0.33362	14.4218	0.33966	1.84875	0.0528343	0.411631		rim		120000	6276.71	57.3931	295927	0.00268237	238.045	13.9813	0.00480727	83.8787	15.3925	0.426309	0.22225	0.00967047	13.2471
JonEBig-073		15.9515	0.347572	16.4137	0.3541	1.52463	0.041483	0.626991		rim		120000	6315.69	71.0215	297182	0.000526282	333.801	14.8371	0.00633791	116.019	16.6926	0.508267	0.218219	0.0123581	17.9806
JonEBig-074		14.2795	0.329545	14.7028	0.32954	1.73514	0.047584	0.532509		rim		120000	6224.07	58.3345	296487	0.00049182	263.553	14.6964	0.00545816	89.6886	13.6428	0.439778	0.215017	0.00735533	13.9213
JonEBig-075		14.5304	0.337361	14.9611	0.33736	1.73828	0.0506104	0.565147		rim		120000	6203.77	56.5488	295155	0.0100101	302.164	14.0062	0.0208294	96.1643	12.6666	0.439542	0.215138	0.0119589	14.1618
JonEBig-076		14.907	0.343925	15.3488	0.34393	1.68168	0.0463429	0.619115		rim		120000	6332.49	67.9827	297097	0.00257855	330.259	14.9294	0.0208182	103.368	15.1705	0.456238	0.216446	0.0183532	15.0923
JonEBig-077		13.5437	0.32992	13.8772	0.33982	1.91196	0.0575086	0.467007	x	rim		120000	6255.45	59.1207	296825	0.000848103	243.985	13.2987	0.00319163	78.2637	12.8432	0.393093	0.212053	0.00952073	11.7748
JonEBig-078		14.8786	0.335186	15.3414	0.34293	1.6273	0.0459625	0.454263		rim		120000	6197.6	64.1765	295653	0.0310425	286.714	14.0934	0.00620789	97.9651	16.7307	0.460921	0.211725	0.0102562	15.2327
JonEBig-079		13.6135	0.316548	14.017	0.31655	1.85124	0.0506569	0.461918		rim		120000	6153.9	57.3878	296599	0.00106826	230.29	13.8753	0.00751457	82.0391	10.2771	0.434702	0.226767	0.00865407	13.1336
JonEBig-080		16.0971	0.330056	16.5742	0.33006	1.4968	0.0371541	0.447067		rim		120000	6073.18	71.8757	298219	0.0019675	306.081	15.717	0.0169673	122.73	20.2041	0.585534	0.246587	0.0144977	20.9184
JonEBig-081		16.309	0.337695	16.7924	0.3377	1.45332	0.036673	0.615008		rim		120000	6137.54	70.6173	294936	0.000216535	299.598	16.1757	0.00516277	122.458	20.3808	0.580871	0.237657	0.0126812	21.0563
JonEBig-082		18.0324	0.35577	18.5669	0.35577	1.23229	0.0304636	0.488835		rim		120000	6302.86	71.1285	295594	0.00112405	362.237	15.6374	0.00310912	153.137	21.9484	0.65663	0.22798	0.0158836	26.3306
JonEBig-083		17.6646	0.347187	18.1882	0.34719	1.32183	0.0321454	0.62932		rim		120000	6270.24	84.3815	294388	0.00260781	406.718	16.2968	0.00202589	157.271	23.8242	0.656922	0.244391	0.0120061	25.7819
JonEBig-084		19.4552	0.338541	20.0318	0.33854	1.09439	0.0241395	0.50717		rim		120000	6342.53	93.966	297323	0.0261388	496.097	18.4877	0.138232	217.385	34.2471	0.88623	0.27364	0.124254	38.3463
JonESml-001		7.95653	0.206263	8.19236	0.206263	2.59063	0.0756562	0.558118		3		120000	6182.34	63.8366	296629	0.000405697	144.413	12.3439	0.00254816	31.7727	5.16027	0.301349	0.21968	0.00529827	5.30911
JonESml-002		5.80275	0.150288	5.97474	0.150288	2.78261	0.079948	0.556848		3		120000	6336.2	62.2504	294342	0.000408133	127.544	13.8095	0.00300788	24.3713	3.80279	0.306992	0.241091	0.00384085	3.9419
JonESml-003		7.2777	0.203046	7.49341	0.203046	2.68929	0.0841611	0.695566		3		120000	6305.96	54.539	290135	0.000162937	118.055	10.1312	0.000758694	24.1631	4.53821	0.251986	0.19087	0.00451823	4.0695
JonESml-004		7.65568	0.189324	7.88259	0.189324	2.50737	0.0699551	0.545343		3		120000	6234.91	50.9785	290608	0.0166107	134.611	11.9222	0.0969478	32.9782	3.94513	0.323707	0.22864	0.0700956	5.48086
JonESml-005		7.65645	0.261708	7.88338	0.261708	2.50143	0.0970288	0.639438		3		120000	6286.53	47.3338	291248	0.0254751	114.433	5.7073	0.0559185	19.4072	2.16207	0.166978	0.117651	0.00905573	2.83126
JonESml-006		2.46183	0.0746923	2.5348	0.0746923	3.31207	0.106941	0.564116		3		120000	6134.65	52.6878	295355	0.0262522	71.8038	11.5579	0.0553751	8.37635	2.02708	0.232924	0.218275	0.0917262	1.27122
JonESml-007		5.46153	0.142901	5.62341	0.142901	2.88538	0.083396	0.635522		3		120000	6213.81	54.2973	293067	0.00111939	106.202	12.2661	0.0131263	22.1009	2.7729	0.298534	0.242688	0.0340224	3.6093
JonESml-008		1.95611	0.0591987	2.01409	0.0591987	3.29223	0.10506	0.428112		3		120000	6231.02	65.0691	293165	<0.000	62.4948	11.9127	0.00294391	6.38402	<0.627	0.232836	0.216454	0.00375001	1.00962
JonESml-009		5.49482	0.155582	5.65769	0.155582	2.85245	0.08951	0.40595		2		120000	6287	54.6692	284421	0.000904516	80.5252	10.8838	0.00305937	18.2328	2.73681	0.259722	0.208443	0.00356079	3.15928
JonESml-010		5.16387	0.134746	5.31693	0.134746	2.85565	0.0842423	0.504691		2		120000	6218.27	65.9401	287632	0.00209689	105.932	12.6051	0.012831	21.9137	3.18463	0.304156	0.245034	0.00615004	3.47975
JonESml-011		9.11459	0.235315	9.38474	0.235315	2.39352	0.0703183	0.586527		2		120000	6076.75	79.5015	283994	0.0295475	134.389	11.5441	0.0734212	35.409	4.34196	0.297519	0.201268	0.0417111	6.01459
JonESml-012		3.04677	0.115626	3.13708	0.115626	3.21009	0.138554	0.445121		2		120000	6236.52	62.2202	285235	0.00701554	86.8007	12.0007	0.0545198	10.8643	2.30575	0.235403	0.21312	0.0515698	1.59131
JonESml-013		4.37294	0.166686	4.50255	0.166686	2.90392	0.122045	0.597874		2		120000	6180.61	59.3682	287231	0.000418448	65.2171	6.68526	0.00398591	8.81845	1.14298	0.143272	0.117095	0.00525363	1.38462
JonESml-014		5.27103	0.167377	5.42727	0.167377	2.86667	0.100854	0.643474		2		120000	6161.57	60.7497	286191	<0.000	89.1583	8.74636	0.00256415	14.9659	2.86442	0.201542	0.162786	0.00628701	2.35547
JonESml-015		1.9471	0.052682	2.00482	0.052682	3.24425	0.0910016	0.275011		2		120000	6242.01	61.2593	286006	0.0120113	80.6014	17.8602	0.119392	10.4997	1.09679	0.371201	0.337952	0.22252	1.59808
JonESml-016		9.46351	0.284342	9.74401	0.284342	2.31353	0.0796982	0.441419		2		120000	6095.52	68.1967	284690	0.00410673	114.585	8.30866	0.0354956	26.1861	5.27302	0.213889	0.139664	0.0145987	4.48627
JonESml-017		0.042535	0.0229316	0.0437958	0.0229316	3.54706	0.0771955	-0.727484		2		120000	6157.61	67.6051	285313	0.00185031	46.0536	429.169	0.00477879	5.70777	<0.635	10.171	10.0718	1.77736	0.95541
JonESml-018		2.66926	0.235155	2.74838	0.235155	3.22717	0.0979423	-0.123591		2		120000	6991.75	77.8184	284019	38.7288	808.601	15.342	21761.2	18.4107	1.60656	0.33999	0.317377	511.258	2.04888
JonESml-019		2.47246	0.0774968	2.54575	0.0774968	3.27324	0.109456	0.591335		2		120000	6284.65	59.3818	283185	0.00767867	62.3309	10.6931	6.96478	7.60234	0.823108	0.218007	0.201181	0.209545	1.19413
JonESml-020		3.11749	0.0973693	3.20989	0.0973693	3.20927	0.108215	0.598932		2		120000	6112.48	74.5626	283713	0.000667358	64.4941	10.4174	0.133233	9.69434	0.936609	0.21995	0.198627	0.00844915	1.51987
JonESml-021		3.47559	0.108483	3.57861	0.108483	3.04874	0.103526	0.513342		2		120000	6327.7	57.4182	281685	0.00228124	75.5787	9.581	0.152217	10.7526	0.984534	0.207758	0.179043	0.0179524	1.60398
JonESml-022		6.29806	0.20432	6.48474	0.20432	2.71944	0.0973696	0.590391		2		120000	6286.35	45.4761	292343	0.00418754	93.1853	6.46633	0.00961139	18.6943	2.44812	0.204845	0.157009	0.00515793	2.86642
JonESml-023		4.20832	0.131846	4.33305	0.131846	3.00953	0.103348	0.493987		2		120000	6327.04	52.6656	289810	0.0332823	81.6509	8.31423	0.247135	13.3581	2.03904	0.217801	0.184699	0.0366373	2.0322
JonESml-024		6.49142	0.243308	6.68382	0.243308	2.65891	0.112023	0.621217		2		120000	6193.84	50.1108	288695	0.00117038	81.1705	5.67805	0.00172821	13.5874	2.4157	0.146938	0.110027	0.00527747	2.11434
JonESml-025		2.2203	0.0888144	2.28611	0.0888144	3.27901	0.139578	0.468185		2		120000	6237.29	52.6379	288234	0.0215624	32.1291	6.26951	0.0329967	3.83861	<0.643	0.135014	0.124994	0.0228712	0.665632
JonESml-026		11.1998	0.231691	11.5318	0.231691	2.10507	0.0498945	0.600117		1		120000	6279.49	57.0908	277998	0.000416528	210.511	19.4422	0.00305231	66.3985	10.4055	0.500456	0.297177	0.008497	12.4302
JonESml-027		4.30942	0.112055	4.43716	0.112055	2.91055	0.0830968	0.526811		1		120000	6241.08	53.4033	282070	0.000930277	119.521	14.243	0.00174244	19.0737	2.85128	0.305756	0.250828	0.0058115	2.92593
JonESml-028		6.49118	0.167016	6.68358	0.167016	2.74094	0.078567	0.478903		1		120000	6312.51	60.7318	277538	0.000665598	150.498	13.8064	0.00534148	29.5809	4.9044	0.316199	0.244336	0.00921023	4.55061
JonESml-029		7.99508	0.198328	8.23206	0.198328	2.58779	0.0722535	0.613173		1		120000	6278.9	57.8467	275485	0.0201649	154.263	13.6195	0.0802622	35.1286	5.55083	0.331359	0.241581	0.0101424	5.88165
JonESml-030		6.67413	0.191876	6.87195	0.191876	2.72241	0.0901267	0.659832		1		120000	6410.84	56.8628	277546	0.00186554	123.909	10.0971	0.0168535	23.2589	4.80359	0.245977	0.188886	0.00462224	3.64438
JonESml-031		7.79934	0.202336	8.03051	0.202336	2.52152	0.0738696	0.545419		1		120000	6340.34	57.2416	285009	0.000647435	156.673	12.5218	0.00254354	33.0229	5.41474	0.300405	0.213367	0.00457021	5.19461
JonESml-032		9.9507	0.255356	10.2456	0.255356	2.29386	0.0674809	0.61377		1		120000	6335.65	51.255	276771	0.00065977	139.246	11.0088	0.00259163	39.1235	6.09541	0.311507	0.201276	0.00350327	6.87196
JonESml-033		8.91122	0.225922	9.17535	0.225922	2.37213	0.068578	0.53746		1		120000	6245.17	48.2258	275266	0.00734774	166.763	11.4914	0.148011	37.816	5.97788	0.313527	0.209383	0.00537099	6.19981
JonESml-034		10.925	0.226323	11.2488	0.226323	2.19103	0.0517563	0.536741		1		120000	6250.75	61.0604	276176	0.000168124	252.817	18.9204	0.00650328	69.006	10.1262	0.486769	0.30062	0.00682036	11.8064
JonESml-035		6.51063	0.17428	6.70361	0.17428	2.64691	0.0851998	0.666973		1		120000	6283.75	56.9343	280716	0.000169036	132.485	11.9602	0.0025526	26.2968	2.88513	0.283468	0.211356	0.00409817	4.09926
JonESml-036		4.87878	0.132301	5.02339	0.132301	2.91409	0.0870642	0.324523		1		120000	6336.97	60.7628	286988	0.000657101	119.462	13.8827	0.00257974	19.7542	2.24634	0.282396	0.231741	0.0103707	3.05551
JonESml-037		3.48781	0.13522	3.59119	0.13522	3.30733	0.138544	0.695843		1		120000	6135.93	55.4142	280548	0.000478463	78.9374	7.37861	0.00141231	7.35844	0.813699	0.134603	0.125322	0.00542603	1.04519
JonESml-038		6.69746	0.16019	6.89597	0.16019	2.72306	0.072511	0.60747		1		120000	6438.4	116.399	284375	0.0221699	205.538	19.4385	0.087131	34.6034	4.96087	0.365374	0.280674	0.0242539	5.42191
JonESml-039		8.75601	0.235789	9.01554	0.235789	2.34297	0.074053	0.549303		1		120000	6441.9	95.3826	284052	0.0118606	228.574	19.8645	0.0324607	52.0066	10.3763	0.448225	0.296061	0.0315186	8.70878
JonESml-040		10.4509	0.230698	10.7607	0.230698	2.2412	0.0564519	0.208163		1		120000	6334.99	51.9509	286656	0.00161784	166.35	14.8538	0.00832984	53.5705	9.00168	0.426698	0.269598	0.063603	9.89356
JonESml-041		8.26144	0.22895	8.50631	0.22895	2.40228	0.0770212	0.250348		1		120000	6241.67	58.683	284111	0.000743172	126.169	11.1293	0.00885963	31.1283	4.10001	0.294926	0.199556	0.027406	5.40561
JonESml-042		2.522	0.21696	2.59675	0.21696	3.27536	0.0793191	-0.337018		1		120000	6236.73	70.6464	285096	0.00112516	87.1752	18.7266	0.00209663	15.2316	1.83861	0.445389	0.408734	0.0366021	2.48852
JonESml-043		2.5276	0.0761194	2.60251	0.0761194	3.27576	0.105238	0.578676		1		120000	6321.87	66.2757	287381	0.00655151	65.9665	11.8272	0.047719	8.43184	1.35059	0.229989	0.212584	0.118946	1.28858
JonESml-044		7.75118	0.219071	7.98092	0.219071	2.51391	0.0817099	0.667299		1		120000	6251.46	71.5715	280377	0.000165881	163.899	10.9089	0.00293372	28.6958	4.23974	0.247467	0.175599	0.0105168	4.24907
JonESml-045		6.3684	0.171069	6.55716	0.171069	2.76288	0.0826885	0.566513		1		120000	6257.46	75.7068	282528	0.00184518	142.397	13.164	0.00341903	25.0484	2.41148	0.2806	0.21838	0.00858354	3.96507
JonESml-046		3.31727	0.104772	3.41559	0.104772	3.20418	0.109484	0.650109		1		120000	6287.96	65.0619	281150	0.000174507	70.6618	10.2955	0.00399659	10.1442	1.22219	0.214134	0.193195	0.00421635	1.57644
JonESml-047		4.02467	0.123587	4.14396	0.123587	3.01732	0.101433	0.479875		1		120000	6211.34	74.8469	279042	0.000897817	89.9672	10.886	0.00256881	12.848	2.8265	0.219372	0.186343	0.00656443	1.95874
JonESml-048		7.3023	0.179661	7.51874	0.179661	2.68598	0.0738519	0.53709		1		120000	6207.03	92.324	284320	0.00191053	128.953	15.6918	0.00262757	33.3084	5.15076	0.348279	0.263455	0.010717	5.63366
JonESml-049		2.44716	0.0729963	2.51969	0.0729963	3.15563	0.101561	0.509194		1		120000	6080.38	55.326	288568	0.0541404	63.1959	9.56974	0.0262891	8.93581	1.34377	0.250725	0.222735	0.011571	1.35992
JonESml-050		5.9445	0.182016	6.1207	0.182016	2.80441	0.0954938	0.472735		1		120000	6190.33	41.1616	292028	0.014051	105.078	8.81092	0.0225901	19.4726	2.94457	0.226175	0.17858	0.00902973	2.97613
JonESml-051		7.1745	0.273374	7.38715	0.273374	2.54484	0.109922	0.542001		1		120000	6351.1	47.5229	290293	0.0733421	107.505	5.20171	0.0574721	15.4017	1.77876	0.137845	0.0986221	0.0129449	2.19502
											Plot of data for internal standard BP-1
BP-001		23.9778	0.648799	24.6885	0.648799	0.574979	0.0318077	0.157947
BP-002		1.45941	0.0786012	1.50266	0.0786012	3.37408	0.121156	0.19748
BP-003		21.4804	0.591398	22.1171	0.591398	0.934122	0.0384799	0.526753
BP-004		3.29995	0.123729	3.39776	0.123729	3.04955	0.124423	0.508726
BP-005		10.2691	1.25977	10.5735	1.25977	2.25262	0.229803	-0.952279
BP-006		0.339646	0.0202348	0.349713	0.0202348	3.43761	0.120402	0.13004
BP-007		22.9366	0.743799	23.6165	0.743799	0.784859	0.0364082	0.318779
BP-008		0.934851	0.0381036	0.96256	0.0381036	3.33246	0.136183	0.527164
BP-009		20.5631	0.790838	21.1726	0.790838	1.19664	0.0597633	0.309317
BP-010		1.35368	0.0680034	1.3938	0.0680034	3.27485	0.155507	0.401892
BP-011		14.4731	0.610382	14.9021	0.610382	1.7406	0.101297	-0.363083
BP-012		1.63393	0.0558223	1.68236	0.0558223	3.50483	0.124438	0.601892	x
BP-013		17.4704	0.668629	17.9882	0.668629	1.29894	0.062689	0.234842
BP-014		2.07586	0.0695228	2.13739	0.0695228	3.27783	0.116163	0.135129
BP-015		12.3279	0.540753	12.6933	0.540753	1.97871	0.102557	0.571998
BP-016		1.29904	0.0414799	1.33754	0.0414799	3.23569	0.106568	0.665592
BP-017		13.7746	0.576139	14.1829	0.576139	1.79107	0.0899194	0.611001
BP-018		10.9571	0.528352	11.2818	0.528352	2.28246	0.127172	0.37615
BP-019		11.1284	0.535775	11.4582	0.535775	2.18456	0.122231	0.501607
BP-020		15.5976	0.661842	16.0599	0.661842	1.53934	0.0805863	0.466679
BP-021		13.147	0.620143	13.5366	0.620143	1.8995	0.12197	0.53839
BP-022		5.45892	0.30828	5.62072	0.30828	3.01565	0.188531	0.521127
BP-023		25.7645	0.819141	26.5281	0.819141	0.535584	0.0288355	0.379899
BP-024		19.5731	0.671673	20.1532	0.671673	1.10913	0.0615291	0.240769
BP-025		22.1066	0.75309	22.7619	0.75309	0.853898	0.0480359	0.547411
BP-026		19.8326	0.495314	20.4205	0.495314	1.14336	0.0409077	0.396343
BP-027		25.1079	0.745574	25.8521	0.745574	0.459461	0.0253742	0.424739
BP-028		26.3259	0.789239	27.1062	0.789239	0.419478	0.0223948	0.475011
BP-029		25.1213	0.773136	25.8659	0.773136	0.457758	0.0236127	0.264224
BP-030		27.4109	0.58632	28.2234	0.58632	0.169209	0.00860279	0.245641
BP-031		21.8623	0.682629	22.5103	0.682629	0.953013	0.0404634	0.336275
BP-032		24.5378	0.8644	25.2651	0.8644	0.67787	0.0356291	0.283372
BP-033		24.2192	0.798533	24.9371	0.798533	0.559519	0.0317829	0.42162
BP-034		22.3595	0.920059	23.0223	0.920059	0.864109	0.0499287	0.518898
BP-035		21.7345	0.843583	22.3787	0.843583	0.685226	0.0395662	0.643349	x
BP-036		14.6647	0.764466	15.0994	0.764466	1.75063	0.110302	0.517475
BP-037		19.8493	0.840511	20.4377	0.840511	1.03988	0.0639293	0.337769
BP-038		22.2959	0.816556	22.9568	0.816556	0.72827	0.039037	0.503463
BP-039		20.8001	0.812739	21.4166	0.812739	1.04405	0.0577475	0.520992
BP-040		15.1266	0.766098	15.5749	0.766098	1.75227	0.107151	0.460946

## Sheet: Table S5
Table S5 - Apatite Lu-Hf data with selected trace elements. Unknowns are presented first (JonEbig_ap) then two secondary standards. Analyses marked with an "x" were not used for age calcuations
																																			Chondrite normalised (McDonough and Sun, 1995)
			176Lu/176Hf	± 2σ	177Hf/176Hf	± 2σ	Rho			27Al	43Ca	47Ti->113	88Sr	89Y->172	90Zr->173	139La	140Ce	141Pr	146Nd	147Sm	153Eu	157Gd	159Tb	163Dy	165Ho	166Er	169Tm	172Yb	175Lu->257		Sum LREE	Sr/Y			La139	Ce140	Pr141	Nd146	Sm147	Eu151	Gd157	Tb159	Dy163	Ho165	Er166	Tm169	Yb174	Lu175
	JonEbig_ap-001		29.307	0.899588	0.00362039	0.00152722	0.177462			9.99236	397000	0.080324	394.888	1769.86	0.0704344	425.385	1522.9	227.405	992.179	258.859	14.4116	261.461	41.5936	282.664	53.1243	142.427	16.8482	90.6997	10.0383		3167.86	0.223118			1794.87	2484.33	2450.49	2171.07	1749.05	255.979	1313.87	1152.18	1149.04	972.972	890.17	682.113	563.352	408.063
	JonEbig_ap-002		28.9378	0.883916	0.0120594	0.0027871	-0.176607			11.5846	397000	0.0331248	404.898	1742.32	0.110857	428.851	1526.42	229.646	995.227	255.557	14.6607	261.04	41.2904	279.859	52.6191	141.363	16.7578	90.688	11.4881		3180.15	0.23239			1809.5	2490.09	2474.63	2177.74	1726.74	260.403	1311.76	1143.78	1137.64	963.72	883.519	678.453	563.279	466.998
	JonEbig_ap-003		29.7362	0.933155	0.0380205	0.00519238	0.14838			12.7433	397000	0.0567614	381.302	1728.66	0.179529	404.338	1467.67	223.522	981.003	252.337	13.778	254.452	40.8351	276.234	51.8882	139.725	16.3842	88.2669	10.4538		3076.53	0.220576			1706.07	2394.25	2408.64	2146.61	1704.98	244.724	1278.65	1131.17	1122.9	950.333	873.283	663.329	548.242	424.952
	JonEbig_ap-004		30.2113	0.932068	0.00412055	0.00163593	0.112719			3.00637	397000	0.126507	397.392	1761.34	0.0698502	417.953	1467.78	223.852	973.175	253.156	14.2025	252.841	41.0561	279.046	52.8285	142.503	16.7824	91.2364	10.22		3082.77	0.225619			1763.52	2394.43	2412.2	2129.49	1710.52	252.264	1270.56	1137.29	1134.34	967.554	890.646	679.448	566.686	415.447
	JonEbig_ap-005		29.2565	0.882651	0.00382401	0.00153988	0.126615			2.41478	397000	0.0925346	385.292	1798.65	0.0926663	398.93	1416.91	219.145	964.938	251.515	13.9181	254.887	41.2897	284.959	54.3811	146.568	17.4481	93.5445	9.80253		2999.92	0.214212			1683.25	2311.44	2361.47	2111.46	1699.42	247.213	1280.84	1143.76	1158.37	995.991	916.05	706.399	581.022	398.477
	JonEbig_ap-006		29.0792	0.863428	0.0055231	0.00182283	-0.128484			2.85266	397000	<0.003	365.658	1861.8	0.0590637	356.138	1292.54	208.577	925.155	244.123	13.0409	251.523	41.7057	292.932	56.6453	155.132	18.1814	96.7046	11.0691		2782.41	0.1964			1502.69	2108.55	2247.6	2024.41	1649.48	231.632	1263.93	1155.28	1190.78	1037.46	969.575	736.089	600.65	449.963
	JonEbig_ap-007		29.2787	0.886035	0.0384291	0.00502789	-0.0183486			6.74792	397000	0.128281	377.244	1783.19	0.161145	395.134	1431.5	222.533	970.15	254.037	13.6153	254.556	41.1575	284.127	53.7356	146.004	17.2552	93.1788	10.5131		3019.32	0.211555			1667.23	2335.24	2397.98	2122.87	1716.46	241.834	1279.18	1140.1	1154.99	984.169	912.528	698.593	578.75	427.363
	JonEbig_ap-008		29.7149	0.910159	0.0209259	0.00370942	-0.361285			31.018	397000	0.0341443	363.83	1778.91	0.208702	368.008	1351.99	215.884	956.856	249.404	13.18	253.492	41.0522	283.897	53.9398	145.883	17.0986	91.4168	9.43672		2892.74	0.204524			1552.77	2205.54	2326.33	2093.78	1685.16	234.102	1273.83	1137.18	1154.05	987.909	911.769	692.25	567.806	383.607
	JonEbig_ap-009		29.5337	0.922452	0.0101231	0.00261631	-0.00745551			10.2193	397000	0.0584536	358.172	1773.58	0.092824	305.885	1204.35	204.712	926.487	248.389	12.9021	250.593	41.0592	281.778	53.469	143.679	16.8209	89.2093	8.97932		2641.44	0.201949			1290.65	1964.69	2205.95	2027.32	1678.3	229.168	1259.26	1137.37	1145.44	979.285	897.991	681.007	554.095	365.013
	JonEbig_ap-010		20.338	1.02953	1.12944	0.153754	-0.820089			771.7	397000	0.333216	363.282	1733.81	3.6711	265.135	1059.15	185.032	862.493	237.613	12.7353	245.996	40.2976	274.647	52.2935	141.302	16.5838	88.4637	8.98691		2371.81	0.209528			1118.71	1727.81	1993.88	1887.29	1605.49	226.204	1236.16	1116.28	1116.45	957.757	883.138	671.411	549.464	365.322
	JonEbig_ap-011		30.1219	1.00128	0.00785003	0.0024685	0.0391348			0.751745	397000	<0.001	367.227	1743.76	0.0928537	332.65	1239.03	206.145	926.06	247.293	13.0515	252.738	40.7572	277.668	52.2938	140.647	16.5749	87.2988	8.86339		2703.88	0.210594			1403.59	2021.25	2221.39	2026.39	1670.9	231.82	1270.04	1129.01	1128.73	957.762	879.046	671.048	542.229	360.3
	JonEbig_ap-012		29.7005	0.938713	0.0399726	0.00537985	-0.0261562			231.04	397000	0.0344666	373.194	1738.49	0.114291	386.213	1394.39	221.867	976.997	253.034	13.403	255.514	40.5738	276.895	52.1702	139.682	16.395	87.6404	9.9671		2979.47	0.214665			1629.59	2274.71	2390.81	2137.85	1709.69	238.065	1283.99	1123.93	1125.59	955.497	873.012	663.763	544.35	405.167
	JonEbig_ap-013		28.7415	0.893003	0.0331846	0.00478288	0.127634			101.31	397000	0.0817002	381.694	1727.99	0.116134	404.106	1444.63	225.432	988.468	254.868	13.553	257.426	40.8016	276.379	52.0051	139.431	16.3735	87.013	10.8039		3062.64	0.220889			1705.09	2356.66	2429.22	2162.95	1722.08	240.727	1293.6	1130.24	1123.49	952.474	871.445	662.894	540.454	439.183
	JonEbig_ap-014		29.8404	0.936131	0.0232847	0.00401974	0.110976			66.5494	397000	0.0933045	364.744	1766.83	0.131712	373.713	1357.71	218.636	975.104	254.026	13.3065	261.101	41.4818	281.77	53.1973	142.087	16.6754	88.6116	9.71998		2925.16	0.206439			1576.85	2214.86	2355.99	2133.71	1716.39	236.35	1312.06	1149.08	1145.41	974.309	888.046	675.119	550.383	395.121
	JonEbig_ap-015		26.1853	0.921536	0.270541	0.0470609	-0.403644			449.906	397000	0.140591	366.204	1715.25	1.09819	322.221	1196.68	200.321	898.573	240.86	12.7547	250.543	39.5357	271.922	51.9412	139.067	16.3858	86.3996	9.451		2617.79	0.213499			1359.58	1952.17	2158.63	1966.24	1627.43	226.548	1259.01	1095.17	1105.37	951.304	869.171	663.392	536.643	384.187
	JonEbig_ap-016		17.6789	0.451071	1.4155	0.0440933	0.591972			8.25465e+06	397000	3556.84	4.64223	18385.9	1116.81	2.33435	11.9051	2.10618	9.93587	19.2244	4.05555	101.264	93.3211	1636.7	728.885	4119.75	951.174	8899.75	1584.54		26.2815	0.000252488			9.84958	19.421	22.6959	21.7415	129.895	72.0346	508.864	2585.07	6653.25	13349.5	25748.4	38509.1	55277.9	64412.1
	JonEbig_ap-017		31.1401	0.998151	0.00792002	0.00237096	0.136854	x		11.873	397000	0.0548531	365.852	1736.51	0.13773	304.772	1151.02	195.122	892.017	238.652	12.6647	243.695	39.2727	269.301	50.629	135.106	15.8154	84.2075	9.41437		2542.93	0.210683			1285.96	1877.68	2102.6	1951.9	1612.51	224.951	1224.6	1087.89	1094.72	927.271	844.415	640.3	523.028	382.698
	JonEbig_ap-018		29.8092	1.08739	0.0506685	0.00712787	0.25168			368.122	397000	0.317035	373.034	1679.88	0.0906221	388.882	1386.46	219.081	965.739	250.922	13.1411	244.022	39.3382	267.042	49.4397	132.59	15.538	83.3425	8.24489		2960.16	0.22206			1640.85	2261.76	2360.79	2113.21	1695.42	233.413	1226.24	1089.7	1085.54	905.489	828.686	629.069	517.655	335.158
	JonEbig_ap-019		28.5604	0.947217	0.0633233	0.00888191	-0.125876			250.443	397000	0.315137	357.307	1949.65	0.192107	390.607	1391.91	219.663	977.723	257.824	13.0212	256.478	42.6194	301.901	59.0265	160.513	18.8828	100.025	10.8995		2979.9	0.183267			1648.13	2270.65	2367.06	2139.44	1742.05	231.282	1288.83	1180.59	1227.24	1081.07	1003.21	764.484	621.274	443.071
	JonEbig_ap-020		27.2103	1.05595	0.340466	0.0205718	-0.783212			160.331	397000	0.190577	355.123	1909.02	0.780725	323.584	1201.5	201.862	914.006	250.841	12.6381	256.812	42.3468	298.106	58.1536	157.993	18.5358	98.2153	10.438		2640.95	0.186024			1365.33	1960.03	2175.24	2000.01	1694.87	224.478	1290.51	1173.04	1211.81	1065.08	987.459	750.436	610.033	424.309
	JonEbig_ap-021		30.3072	0.903989	0.00429051	0.00161382	-0.0284375			5.25952	397000	0.0455456	354.46	1944.76	0.0694374	328.476	1206.94	202.975	907.318	250.276	12.7616	258.314	43.0139	302.45	59.0191	159.292	18.6883	98.3912	11.4426		2645.71	0.182264			1385.98	1968.91	2187.23	1985.38	1691.05	226.671	1298.06	1191.52	1229.47	1080.94	995.577	756.612	611.125	465.148
	JonEbig_ap-022		29.4476	0.869106	0.00563185	0.00182901	-0.105624			4.64592	397000	0.0340872	351.903	1937.99	0.0561268	323.315	1192.19	199.877	902.005	244.341	12.7021	257.68	42.623	303.74	58.9892	159.38	18.6205	97.655	10.2159		2617.38	0.181582			1364.2	1944.84	2153.85	1973.75	1650.95	225.615	1294.87	1180.69	1234.71	1080.39	996.128	753.865	606.553	415.279
	JonEbig_ap-023		29.3125	0.689024	0.00216418	0.000882982	-0.0216211			2.72709	397000	0.139241	355.429	1909.58	0.0734704	252.959	1031.28	182.655	858.72	244.077	12.6967	256.169	41.6945	290.041	58.0339	172.168	22.8009	140.505	16.7953		2325.62	0.186129			1067.34	1682.35	1968.27	1879.04	1649.17	225.519	1287.28	1154.97	1179.03	1062.89	1076.05	923.113	872.7	682.734
	JonEbig_ap-024		29.2858	0.685697	0.0234125	0.00293751	0.169618			10.4289	397000	0.0224391	355.368	1932.26	0.142113	236.18	969.048	173.941	833.297	242.437	12.6917	252.52	41.9974	292.179	58.727	174.081	22.9662	142.114	18.3144		2212.47	0.183913			996.539	1580.83	1874.36	1823.41	1638.09	225.431	1268.94	1163.36	1187.72	1075.59	1088.01	929.806	882.694	744.486
	JonEbig_ap-025		29.7681	0.711622	0.00268289	0.00100149	-0.0929034			0.747794	397000	0.0701294	357.759	1899.83	0.0527844	257.085	1047.27	183.337	857.524	244.905	12.6119	254.016	41.6815	288.135	57.9584	170.58	22.5256	139.381	14.6495		2345.22	0.188311			1084.75	1708.44	1975.61	1876.42	1654.76	224.013	1276.46	1154.61	1171.28	1061.51	1066.13	911.968	865.722	595.506
	JonEbig_ap-026		29.8038	0.709404	< DL	0.00054115	0.381634	x		0.666551	397000	0.0107471	354.125	1911.08	0.0603472	255.383	1029.74	182.734	859.866	245.7	12.7981	252.753	41.7969	290.561	58.3425	173.068	22.7003	140.612	15.935		2327.72	0.185301			1077.56	1679.83	1969.12	1881.55	1660.13	227.319	1270.11	1157.81	1181.14	1068.54	1081.68	919.042	873.367	647.763
	JonEbig_ap-027		29.0957	0.670727	0.00113807	0.000626411	-0.0913904			0.957761	397000	0.0345445	356.128	1972.1	0.0566672	248.131	1019.01	179.974	842.651	242.47	12.766	256.925	42.2612	298.357	60.0446	178.884	23.9265	147.051	18.1361		2289.76	0.180583			1046.96	1662.33	1939.37	1843.88	1638.31	226.75	1291.08	1170.67	1212.83	1099.72	1118.02	968.685	913.361	737.24
	JonEbig_ap-028		27.0427	0.884975	0.379168	0.015223	-0.884402			125.556	397000	0.184067	361.746	1869.48	1.5869	250.042	1027.4	182.405	851.971	239.736	12.6436	253.516	40.9414	285.912	57.2901	168.391	22.2514	136.953	17.6005		2311.82	0.193501			1055.03	1676.02	1965.57	1864.27	1619.84	224.575	1273.95	1134.11	1162.24	1049.27	1052.44	900.866	850.637	715.467
	JonEbig_ap-029		30.481	0.978942	0.00543547	0.001966	0.112556			1.70421	397000	0.0346752	406.179	1684.43	0.147548	432.957	1491.22	228.293	994.952	254.822	14.2617	253.908	40.4155	268	49.7794	131.673	15.4043	83.4218	8.48877		3147.43	0.241137			1826.82	2432.67	2460.05	2177.14	1721.77	253.316	1275.92	1119.54	1089.43	911.711	822.958	623.656	518.148	345.072
	JonEbig_ap-030		28.7792	0.922678	0.00497016	0.00187514	-0.160206			0.319583	397000	<0.019	409.771	1657.96	0.161516	440.889	1513.4	229.2	998.555	257.076	14.3562	254.934	40.4717	266.796	48.9522	128.224	15.0204	80.0314	8.15475		3182.04	0.247153			1860.29	2468.84	2469.83	2185.02	1737	254.994	1281.07	1121.1	1084.54	896.56	801.399	608.115	497.09	331.494
	JonEbig_ap-031		25.8818	0.770907	0.525684	0.0257285	0.226232			10.6513	397000	0.0635636	408.712	1688.67	1.06911	446.435	1558.85	235.6	1020.5	260.252	14.399	259.001	40.5994	272.086	49.8452	131.796	15.5056	84.001	9.78357		3261.39	0.242032			1883.69	2542.99	2538.79	2233.04	1758.46	255.754	1301.51	1124.64	1106.04	912.915	823.727	627.759	521.746	397.706
	JonEbig_ap-032		27.8322	0.89827	0.0740488	0.0113088	-0.435218			9.36084	397000	0.0465882	404.897	1708.15	0.494711	453.92	1570.06	236.124	1023.39	262.742	14.3748	261.243	41.2007	272.138	50.6089	135.004	15.9818	86.6159	8.53072		3283.5	0.237039			1915.27	2561.27	2544.44	2239.37	1775.28	255.325	1312.78	1141.29	1106.25	926.903	843.778	647.037	537.987	346.777
	JonEbig_ap-033		30.1076	0.950103	0.0051012	0.00186695	-0.0109517			0.250036	397000	<0.008	408.989	1687.15	0.0892975	418.934	1455.41	224.323	975.988	251.887	14.0129	253.945	40.0084	266.055	49.4031	132.477	15.7041	85.8891	9.24116		3074.66	0.242415			1767.65	2374.25	2417.27	2135.64	1701.94	248.897	1276.11	1108.27	1081.53	904.818	827.979	635.795	533.473	375.657
	JonEbig_ap-034		29.5676	0.932589	0.0192716	0.00366636	0.108098			4.69313	397000	0.0275295	400.867	1678.56	0.145905	430.658	1488.63	226.772	982.082	253.383	14.1947	257.303	40.0301	269.906	49.833	132.698	15.6675	84.2112	10.0708		3128.15	0.238816			1817.12	2428.44	2443.66	2148.98	1712.05	252.126	1292.98	1108.87	1097.18	912.693	829.36	634.312	523.051	409.381
	JonEbig_ap-035		29.6538	0.967317	0.0153763	0.00338361	0.399085			3.64523	397000	<0.010	407.813	1651.75	0.172929	436.658	1506.83	228.514	983.965	250.793	14.4083	251.573	40.0947	265.413	48.943	129.667	15.1745	80.7867	8.9463		3155.97	0.246897			1842.44	2458.13	2462.43	2153.1	1694.55	255.919	1264.18	1110.66	1078.92	896.392	810.417	614.351	501.781	363.671
	JonEbig_ap-036		28.5915	0.927337	0.00631067	0.00213997	0.0937606			0.371442	397000	<0.010	411.22	1654.62	0.139718	445.39	1492.32	227.286	984.294	251.268	14.4754	253.279	40.0718	266.424	48.8675	128.056	14.8619	79.2505	7.56935		3149.29	0.248528			1879.28	2434.46	2449.21	2153.82	1697.76	257.112	1272.76	1110.02	1083.03	895.009	800.348	601.695	492.239	307.697
	JonEbig_ap-037		29.3808	1.03172	0.080994	0.00864842	-0.192485			2.0588	397000	<0.011	396.117	1713.69	0.240798	423.14	1448.94	224.692	984.029	253.936	13.9591	254.487	40.187	272.429	51.0541	137.696	16.7319	92.8347	9.92519		3080.8	0.231149			1785.4	2363.69	2421.25	2153.24	1715.79	247.941	1278.83	1113.21	1107.44	935.058	860.603	677.405	576.613	403.463
	JonEbig_ap-038		29.6457	0.859064	0.048896	0.00669693	0.40398			3.09244	397000	0.0199934	388.918	1724.15	0.151198	410.519	1439.8	224.893	983.251	254.593	13.871	257.019	40.6783	272.969	51.6912	140.561	17.1952	96.8109	10.8271		3058.46	0.22557			1732.15	2348.77	2423.42	2151.53	1720.23	246.376	1291.55	1126.82	1109.63	946.725	878.505	696.16	601.31	440.124
	JonEbig_ap-039		29.2287	1.04237	0.0649485	0.00796757	0.142486			99.9736	397000	0.0281635	357.066	1761.28	0.159139	332.984	1233.66	204.495	927.147	247.054	12.8597	257.806	40.7067	279.863	53.1757	143.428	16.7937	88.6989	7.90713		2698.28	0.202731			1405	2012.49	2203.61	2028.77	1669.28	228.414	1295.51	1127.61	1137.66	973.915	896.425	679.909	550.925	321.428
	JonEbig_ap-040		26.836	0.817112	0.315838	0.0228502	0.299246			318.512	397000	0.0938924	361.489	1712.58	0.523694	365.07	1302.57	208.874	936.345	243.961	12.8778	246.326	40.3923	272.386	51.23	138.602	16.2968	86.0425	9.15655		2812.86	0.211078			1540.38	2124.92	2250.8	2048.9	1648.38	228.735	1237.82	1118.9	1107.26	938.279	866.26	659.79	534.426	372.217
	JonEbig_ap-041		29.8554	0.93935	0.0262622	0.00429488	-0.017422			7.43872	397000	0.0202278	349.792	1749.88	0.0640164	156.312	718.123	135.272	671.86	205.489	11.9039	224.454	38.8623	272.857	52.1736	141.487	16.756	88.3899	9.5315		1681.57	0.199895			659.543	1171.49	1457.68	1470.15	1388.44	211.437	1127.91	1076.52	1109.18	955.56	884.291	678.381	549.006	387.459
	JonEbig_ap-042		19.2694	1.23626	1.10692	0.178471	-0.904566			516.271	397000	0.352016	347.972	1710.26	3.69801	165.96	721.213	134.918	672.456	203.107	11.6308	224.192	38.4557	267.985	51.4205	138.701	16.3863	86.1938	8.6824		1694.55	0.203462			700.255	1176.53	1453.86	1471.46	1372.35	206.586	1126.59	1065.26	1089.37	941.767	866.879	663.412	535.365	352.943
	JonEbig_ap-043		29.0128	1.02934	0.0769961	0.00867368	-0.0714936			301.143	397000	0.239459	341.62	1834.49	0.367607	344.501	1245.24	206.021	933.787	248.133	12.7574	252.423	41.8127	290.199	54.9797	149.734	17.9173	95.0367	9.59336		2729.55	0.18622			1453.59	2031.38	2220.06	2043.3	1676.57	226.597	1268.46	1158.25	1179.67	1006.95	935.835	725.396	590.29	389.974
	JonEbig_ap-044		28.9588	0.871628	0.00930665	0.00240532	-0.226808			37.8712	397000	<0.007	337.86	1792.59	0.0977196	347.614	1223.45	201.54	910.742	241.134	12.3077	247.433	40.9744	283.431	53.9647	147.319	17.4747	92.9194	9.88457		2683.34	0.188476			1466.73	1995.84	2171.77	1992.87	1629.28	218.61	1243.38	1135.03	1152.16	988.365	920.744	707.479	577.139	401.812
	JonEbig_ap-045		28.7989	0.861827	0.00200705	0.00110543	0.063822			0.0982853	397000	<0.003	342.453	1830.94	0.102282	388.876	1326.54	212.756	955.423	248.905	12.7829	250.664	41.6726	291.292	54.9431	148.329	17.5299	93.4045	9.35381		2883.6	0.187037			1640.83	2164.02	2292.63	2090.64	1681.79	227.051	1259.62	1154.37	1184.11	1006.28	927.054	709.711	580.152	380.236
	JonEbig_ap-046		29.1434	0.882799	0.00284909	0.00133487	-0.0878035			6.61716	397000	<0.003	342.601	1821.12	0.0613011	383.862	1319.73	210.633	943.73	248.522	12.6546	252.284	41.7395	287.303	54.2855	147.276	17.4775	92.9382	8.54402		2857.96	0.188127			1619.67	2152.91	2269.76	2065.06	1679.21	224.772	1267.76	1156.22	1167.9	994.24	920.474	707.591	577.256	347.318
	JonEbig_ap-047		29.5952	0.901141	0.00275979	0.00132141	0.394432			0.0285429	397000	<0.003	344.279	1833.43	0.061152	393.303	1336.57	213.695	958.342	250.139	12.8322	255.952	42.2974	290.316	54.9312	148.259	17.5853	93.1634	11.3419		2901.91	0.187778			1659.51	2180.38	2302.75	2097.03	1690.13	227.925	1286.19	1171.67	1180.15	1006.07	926.619	711.956	578.654	461.053
	JonEbig_ap-048		29.3023	0.889417	0.00453093	0.00168804	-0.0636697			0.0776577	397000	0.0211919	344.264	1832.03	0.0810907	397.996	1347.53	214.458	961.14	253.573	12.8655	259.778	42.1909	290.374	55.2625	148.877	17.4962	93.109	9.23042		2921.12	0.187913			1679.31	2198.25	2310.97	2103.15	1713.33	228.517	1305.42	1168.72	1180.38	1012.13	930.483	708.347	578.317	375.22
									Plot of data for internal standard Bamble:
	Bamble-001		49.7287	1.47023	0.0159446	0.00257324	0.00838218	X
	Bamble-002		46.9502	1.34449	0.0121335	0.00260875	-0.036184
	Bamble-003		13.7982	1.59706	0.317767	0.00899053	-0.986284	X
	Bamble-004		48.4689	1.45138	0.00986352	0.00246431	-0.11377
	Bamble-005		49.3323	1.43871	0.0173779	0.00319387	0.0304215	X
	Bamble-006		48.6223	1.41813	0.00405338	0.00152844	0.0454077
	Bamble-007		49.0993	1.39936	0.0166897	0.00305533	-0.316069	X
	Bamble-008		48.56	1.38157	0.00337679	0.00136144	0.0438759
	Bamble-009		49.704	1.4296	0.0047588	0.00163452	-0.00789351
	Bamble-010		49.6555	1.43169	0.00586073	0.00182052	-0.0995875
	Bamble-011		48.2659	1.36567	0.0078015	0.00205845	0.111224
	Bamble-012		48.85	1.42046	0.00594012	0.00184926	0.00991117
	Bamble-013		49.4259	1.43647	0.00604177	0.00186475	-0.115164
	Bamble-014		46.9313	1.325	0.0058844	0.00178499	-0.139984
	Bamble-015		49.0971	1.47966	0.00828145	0.00226956	-0.0762115
	Bamble-016		47.6336	1.43323	0.00712698	0.00210268	-0.0749728
	Bamble-017		48.5791	1.49609	0.00281349	0.00135065	-0.148722
	Bamble-018		40.3294	1.83669	0.0693095	0.00650118	-0.72702	X
	Bamble-019		48.3642	1.56561	0.00979845	0.00266807	-0.0358561
	Bamble-020		51.8281	1.75758	0.0059436	0.00217615	0.287016	X
	Bamble-021		47.6728	1.53463	0.0091972	0.00256794	0.153169
	Bamble-022		47.8717	1.56265	0.0047209	0.00185985	0.192744
	Bamble-023		48.2252	1.63765	0.00833286	0.00258609	-0.0678944
	Bamble-024		49.6816	1.77581	0.00737316	0.00255817	-0.136784	X
	Bamble-025		33.1152	1.89648	0.157555	0.0266459	-0.81938	X
	Bamble-026		48.7397	1.65391	0.00389469	0.00176103	0.017364
	Bamble-027		48.3387	1.69429	0.0136947	0.00343231	-0.238561
	Bamble-028		47.9753	1.64972	0.0046816	0.00195575	0.0537409
	Bamble-029		49.2806	1.8376	0.0121804	0.00345484	-0.0787827
	Bamble-030		48.4713	1.76767	0.00597091	0.00235001	-0.273536
	HR-001		133.222	7.71738	0.521583	0.0326229	-0.737676
	HR-002		151.467	6.49526	0.00943732	0.00351085	0.0525925
	HR-003		154.533	6.90376	0.00471071	0.00257929	-0.0561835
	HR-004		154.737	6.97729	0.00848896	0.00350545	-0.000919205
	HR-005		162.963	7.38207	0.010776	0.00397737	0.184413
	HR-006		156.442	6.94418	0.00505624	0.0026562	0.0849263
	HR-007		154.675	6.87351	0.00734105	0.00320383	-0.136365		Plot of data for internal standard HR:
	HR-008		151.479	6.56013	0.0167892	0.00475828	0.145976
	HR-009		156.819	6.84589	0.0121936	0.00407193	-0.0363486
	HR-010		155.851	6.691	0.00954024	0.00353319	-0.0200392
	HR-011		150.622	6.3997	0.00890631	0.00337928	0.313463
	HR-012		150.876	6.45468	0.0106793	0.00373116	-0.02276
	HR-013		152.639	6.7057	< DL	0.00199821	-0.000887626	x
	HR-014		152.442	6.63634	0.0104566	0.00375482	0.0167183
	HR-015		150.426	6.71047	0.0102948	0.00382683	0.122887
	HR-016		157.769	7.486	< DL	0.00224039	-0.230502	x
	HR-017		162.218	7.87543	0.00798111	0.00366639	-0.0613526
	HR-018		151.069	7.02741	0.00807431	0.00352776	0.121025
	HR-019		159.554	7.85753	0.00622077	0.00327557	0.119384
	HR-020		161.992	7.9824	0.00555168	0.00309879	-0.0390085
	HR-021		155.241	7.60255	0.0108438	0.00432024	-0.0152736
	HR-022		155.639	7.53662	0.00881429	0.00383786	0.084972
	HR-023		155.077	7.84708	0.0152086	0.0053098	-0.0711545
	HR-024		154.872	7.86328	0.00779885	0.00378738	-0.200512
	HR-025		161.044	9.57819	0.00920541	0.00485099	-0.0839573
	HR-026		157.146	9.25392	< DL	0.00317457	-0.00299261	x

## Sheet: Table S6
Table S6 - Apatite U-Pb data and TE data, standard data is given below, X indicates analyses that were not used for age calculations
																				Apatite trace element data
Analysis	206Pb/238U	Uncertainty[06/38] 2SE	238U/206Pb	Uncertainty[38/06] 2SE	207Pb/206Pb	Uncertainty[07/06] 2SE	Rho[38/06][07/06]		206Pb/238U Age (Ma)	Uncertainty[06/38] 2SE	238U/206Pb Age (Ma)	Uncertainty[38/06] 2SE	207Pb/206Pb Age (Ma)	Uncertainty[07/06] 2SE	Concordance [38/06][07/06]	Concordance [logratio distance]				29Si	31P	35Cl	47Ti	55Mn	88Sr	89Y	90Zr	139La	140Ce	141Pr	146Nd	147Sm	153Eu	157Gd	159Tb	163Dy	165Ho	166Er	169Tm	172Yb	175Lu	178Hf	232Th	238U		SUM LREE	Sr/Y
JonE_big_UPB-001	0.345034	0.00635935	2.89841	0.0544058	0.168118	0.00119439	0.0986725		1910.84	35.2188	1910.75	35.8665	2538.25	18.0328	75	35.491			JonE_big_UPB-001	74.7211	211944	252.223	3.39047	2549.15	312.98	1546.9	0.0763789	397.589	1292.05	188.691	920.046	242.631	13.1688	249.823	39.509	269.718	48.5846	135.617	15.6977	88.2779	8.70816	0.0143682	0.0186663	57.6828		2798.38	0.202327
JonE_big_UPB-002	0.364997	0.00882177	2.73919	0.0715628	0.198448	0.00445532	-0.839657		2005.81	48.4793	2006.16	52.412	2812.75	63.1485	71	45.537			JonE_big_UPB-002	144.611	211633	238.021	2.58453	2691.04	307.635	1580.08	0.27181	322.562	1164.84	179.745	886.956	243.036	12.9497	248.708	39.894	277.775	49.7453	140.502	16.0027	88.9253	8.59371	0.0135817	0.00535859	42.4258		2554.1	0.194695
JonE_big_UPB-003	0.355276	0.00654812	2.81385	0.0522541	0.187832	0.00139313	0.246726		1959.73	36.1201	1960.25	36.4026	2722.53	20.1927	72	43.0704			JonE_big_UPB-003	91.1903	210815	262.26	2.7513	2495.93	298.853	1581.81	0.0870631	294.319	1102.41	168.217	847.798	232.847	12.495	244.25	39.4111	275.718	50.085	141.681	16.2647	89.3361	8.78715	0.00762993	0.00373284	40.9887		2412.75	0.188931
JonE_big_UPB-004	0.358358	0.00666127	2.78973	0.0527008	0.192177	0.00142653	-0.0677257		1974.38	36.7004	1974.85	37.3069	2760.15	20.4885	72	44.3412			JonE_big_UPB-004	163.19	210882	266.075	3.19198	2556.73	298.958	1573.56	0.0668022	293.552	1123.82	173.523	872.748	237.077	12.476	247.368	39.6918	273.232	49.2975	139.991	16.2021	90.3253	8.81735	0.00686965	0.000924159	39.5513		2463.64	0.189988
JonE_big_UPB-005	0.395449	0.00738055	2.52972	0.047873	0.259768	0.00205708	0.0139969		2148.04	40.0905	2147.36	40.6372	3244.6	25.6937	66	59.5472			JonE_big_UPB-005	165.846	212791	277.758	2.98981	2838.28	300.689	1562.34	0.0523852	130.123	611.587	106.308	592.263	196.698	11.3291	221.505	37.6108	267.935	48.769	140.932	16.6946	96.3559	9.94729	0.0110152	<0.000	21.1026		1440.28	0.192461
JonE_big_UPB-006	0.347059	0.00639667	2.88092	0.0534995	0.165473	0.00119525	0.083951		1920.53	35.3975	1920.79	35.6696	2511.61	18.1419	76	33.4856			JonE_big_UPB-006	248.126	211827	256.148	3.46137	2668.55	315.946	1559.07	0.0840035	401.21	1293.24	189.119	920.785	242.425	13.0706	249.046	39.424	274.155	48.9931	138.599	16.0231	90.215	8.96606	0.0120699	0.0300336	59.9632		2804.35	0.202651
JonE_big_UPB-007	0.349574	0.00656039	2.86172	0.0551556	0.171605	0.00123424	-0.074194		1932.56	36.268	1931.92	37.235	2572.62	18.503	75	36.2576			JonE_big_UPB-007	258.258	212736	276.335	3.3254	2697.23	320.564	1582.74	0.13026	403.956	1303.18	189.495	923.146	244.548	13.4283	249.652	39.8765	275.903	49.5288	139.762	16.3333	92.0049	9.22102	0.0104778	0.0346327	56.6528		2819.78	0.202537
JonE_big_UPB-008	0.34471	0.00635338	2.8993	0.0538409	0.167645	0.00129151	-0.369277		1909.28	35.1901	1910.25	35.4739	2533.52	19.5178	75	35.3091			JonE_big_UPB-008	157.091	211814	275.382	2.66217	2666.11	320.991	1570.38	0.0716457	402.187	1280.37	186.134	908.472	241.194	13.4111	247.742	39.4437	274.431	49.2588	138.313	16.1694	90.7669	9.17431	0.00953734	0.0247115	57.5875		2777.16	0.204404
JonE_big_UPB-009	0.345005	0.00635882	2.8977	0.053895	0.162996	0.00114329	0.0812271		1910.7	35.2162	1911.16	35.5462	2486.23	17.439	77	32.5846			JonE_big_UPB-009	153.997	212211	289.2	2.89446	2685.06	327.807	1573.31	0.0806554	415.946	1307.14	189.064	915.92	241.513	13.6174	247.222	39.5269	275.817	49.233	140.035	16.3041	92.6998	9.33148	0.00546155	0.0457343	63.0346		2828.07	0.208355
JonE_big_UPB-010	0.345357	0.0063653	2.89365	0.0538422	0.168981	0.00120868	0.385515		1912.38	35.2473	1913.47	35.604	2546.83	18.2168	75	35.8871			JonE_big_UPB-010	176.007	212170	222.496	3.04712	2561.71	306.579	1604.17	0.0752007	372.27	1229.89	181.297	887.756	239.756	12.7442	245.676	39.6767	278.705	50.5012	143.855	16.5925	93.8512	9.3121	0.00808407	0.0242959	55.1158		2671.22	0.191114
JonE_big_UPB-011	0.346251	0.00638178	2.88617	0.0535971	0.169552	0.00121581	-0.138144		1916.66	35.3262	1917.76	35.6135	2552.48	18.3031	75	35.9757			JonE_big_UPB-011	91.5624	210990	265.451	3.32864	2599.58	310.566	1648.17	0.0847257	375.23	1217.8	178.577	875.313	236.251	13.0727	246.611	40.0833	283.332	51.8854	149.072	17.241	97.7792	9.71998	0.0138031	0.0235815	54.1047		2646.92	0.188431
JonE_big_UPB-012	0.344205	0.00634407	2.90227	0.0538961	0.166191	0.00118611	0.210325		1906.86	35.1455	1908.55	35.4425	2518.89	17.9774	76	34.6199			JonE_big_UPB-012	1376.5	212181	276.655	4.09009	2950.67	300.521	1704.74	0.337032	331.986	1169.24	176.66	879.88	242.391	12.6124	252.844	41.2585	294.035	54.2615	155.502	17.9545	102.167	10.2964	0.00839804	0.0100224	56.2899		2557.77	0.176285
JonE_big_UPB-013	0.349797	0.00644714	2.85543	0.0530263	0.172788	0.00135021	-0.0826959		1933.62	35.6388	1935.59	35.9446	2584.09	20.1927	75	36.838			JonE_big_UPB-013	3576.89	213366	278.219	6.04508	3498.24	306.634	1616.03	0.598249	361.101	1250.17	186.947	922.775	247.625	12.7097	253.075	40.5007	282.503	51.1841	148.594	17.9221	105.812	11.511	0.0157731	0.00696214	50.0827		2720.99	0.189745
JonE_big_UPB-014	0.343465	0.00635457	2.91001	0.054746	0.166044	0.00122019	0.0730366		1903.31	35.2139	1904.16	35.823	2517.41	18.4994	76	34.7256			JonE_big_UPB-014	234.854	211061	266.563	2.85438	3264.11	300.386	1710.58	0.0736089	230.618	947.975	152.938	802.003	235.689	12.4046	249.525	40.4228	288.886	54.7371	169.369	22.1152	140.726	16.101	0.00937212	0.00358529	49.9334		2133.54	0.175605
JonE_big_UPB-015	0.341288	0.00629031	2.92687	0.054353	0.162897	0.00118889	0.232698		1892.86	34.8874	1894.65	35.1843	2485.2	18.138	76	33.4772			JonE_big_UPB-015	161.056	211674	265.707	3.00193	3260.59	303.367	1711.12	0.0623847	251.846	1017.74	162.711	832.946	240.84	12.4749	252.092	40.5441	288.87	54.7583	169.794	21.9321	140.018	16.0609	0.0120415	0.000607538	52.9206		2265.24	0.177291
JonE_big_UPB-016	0.347126	0.00642078	2.8782	0.054237	0.176473	0.00132407	0.223931		1920.86	35.53	1922.35	36.225	2619.26	19.6522	73	39.4537			JonE_big_UPB-016	167.425	211870	290.919	2.9918	3251.54	299.769	1717.62	0.0567421	216.881	910.785	149.034	776.492	232.806	12.3734	246.386	40.2885	288.126	54.6733	169.791	21.9449	141.328	16.1876	0.00959786	0.000830162	42.3608		2053.19	0.174526
JonE_big_UPB-017	0.337648	0.00623322	2.95966	0.055654	0.158812	0.00113352	0.196998		1875.34	34.6201	1876.44	35.2849	2442.3	17.4319	77	32.002			JonE_big_UPB-017	167.295	211100	270.476	3.04026	3210.64	300.999	1733.23	0.0808256	251.483	1020.61	162.253	832.647	241.182	12.531	254.845	40.9353	290.698	55.0525	171.655	22.2221	142.004	16.2933	0.00965772	0.00289017	60.165		2266.99	0.173663
JonE_big_UPB-018	0.343972	0.00643508	2.9071	0.0551581	0.167119	0.00122479	-0.0146097		1905.74	35.6529	1905.81	36.1601	2528.25	18.5291	75	35.2026			JonE_big_UPB-018	177.58	211974	251.107	2.93619	3229.55	301.828	1707.4	0.0703329	212.233	878.606	143.084	752.166	226.071	12.0164	241.572	40.0304	282.226	54.1624	169.496	21.9687	140.54	16.1239	0.0147906	0.00164867	50.364		1986.09	0.176777
JonE_big_UPB-019	0.386282	0.00715321	2.58502	0.0485674	0.212706	0.00157019	-0.217841	X	2105.56	38.9909	2108.17	39.6085	2925.56	21.5964	72	46.3845			JonE_big_UPB-019	277.651	212276	285.005	2.66456	3466.96	305.926	1696.47	0.260188	179.286	776.258	129.511	693.253	217.344	11.8799	237.134	39.3394	282.02	53.8056	168.835	21.9461	140.452	16.1388	0.00880907	0.00174793	33.9228		1778.31	0.180331
JonE_big_UPB-020	0.344338	0.00634653	2.90053	0.0538638	0.164389	0.00113887	0.0811327		1907.5	35.1573	1909.54	35.4608	2500.56	17.3237	76	33.559			JonE_big_UPB-020	755.819	212765	315.582	3.69422	2894.99	342.536	1585.75	1.14956	435.729	1390.71	201.492	980.874	260.472	14.2568	261.917	41.3357	282.76	49.7056	140.415	16.4648	95.493	9.76748	0.0434506	0.147397	67.9609		3008.8	0.216009
JonE_big_UPB-021	0.342663	0.00631565	2.9166	0.0541621	0.167864	0.00119041	0.0639002		1899.46	35.0092	1900.43	35.2917	2535.71	17.982	75	35.9506			JonE_big_UPB-021	143.622	215605	293.988	3.12225	2790.18	342.327	1561.49	0.0865825	431.783	1380.4	200.739	970.006	256.769	13.9399	258.242	40.6076	279.165	49.1748	139.254	16.3362	96.1002	9.85775	0.0101989	0.0960436	60.0832		2982.92	0.21923
JonE_big_UPB-022	0.342773	0.00631768	2.91354	0.0541054	0.165358	0.00116152	-0.0768363		1899.99	35.0189	1902.16	35.3237	2510.45	17.6341	76	34.512			JonE_big_UPB-022	129.665	214885	284.774	3.04968	2960.61	344.94	1575.05	0.108855	435.737	1381.43	199.76	968.073	257.057	14.1137	258.575	40.7007	279.534	49.1182	138.896	16.6075	97.0965	10.1961	0.00964349	0.259351	64.2647		2985	0.219003
JonE_big_UPB-023	0.346061	0.00637827	2.88671	0.0536072	0.168761	0.00117725	-0.00630989		1915.75	35.3094	1917.45	35.6077	2544.65	17.7511	75	35.5869			JonE_big_UPB-023	176.172	214315	286.564	2.59434	3036.85	356.153	1507.57	0.142621	454.041	1401.72	200.837	965.528	252.3	14.3293	251.921	39.7652	269.698	46.9912	129.403	14.7027	82.7567	8.28648	0.00731281	0.360713	63.6294		3022.13	0.236243
JonE_big_UPB-024	0.343116	0.00632399	2.91149	0.0540674	0.16464	0.00115394	0.113237		1901.63	35.0492	1903.32	35.3452	2503.13	17.5442	76	34.0149			JonE_big_UPB-024	190.952	214447	303.461	2.24574	2935.85	339.17	1586.2	0.101748	429.044	1361.08	196.353	956.281	253.021	13.9574	254.909	40.6037	278.895	49.7376	141.301	16.7485	97.161	10.1529	0.00982715	0.183544	63.7157		2942.76	0.213825
JonE_big_UPB-025	0.340718	0.00627981	2.9321	0.0544501	0.162652	0.00114624	-0.2075		1890.12	34.8369	1891.72	35.1299	2482.66	17.4958	76	33.4805			JonE_big_UPB-025	251.487	214888	310.109	2.83961	2862.59	323.124	1635.49	0.101861	400.771	1301.02	190.423	937.895	250.638	13.431	255.195	41.0162	286.059	51.9428	152.376	18.5939	110.903	12.1006	0.00625	0.105991	63.6428		2830.11	0.19757
JonE_big_UPB-026	0.346693	0.00663157	2.87875	0.0554309	0.168113	0.00309501	-0.0715264		1918.78	36.7026	1922.04	37.0091	2538.2	46.7289	76	35.066			JonE_big_UPB-026	179.907	214708	245.755	3.05646	3082.62	361.457	1514.75	0.145787	463.774	1437.45	206.632	984.437	255.594	14.4254	255.635	40.1641	271.809	47.2305	131.582	15.1462	85.7404	8.59617	0.0117403	0.308896	66.2699		3092.29	0.238625
JonE_big_UPB-027	0.371058	0.00868448	2.70067	0.0644426	0.195786	0.00431796	-0.637415	X	2034.37	47.6137	2030.7	48.456	2790.66	61.5465	73	42.895			JonE_big_UPB-027	98.5066	212675	304.165	2.99886	2956.21	350.454	1429.43	0.0823026	284.508	993.322	151.299	774.733	225.676	13.0616	235.474	37.4039	257.397	45.0412	124.869	14.0265	76.9198	7.49448	0.00818003	0.131227	41.1694		2203.86	0.24517
JonE_big_UPB-028	0.339764	0.00761685	2.93902	0.0698577	0.173378	0.00156381	-0.427002		1885.53	42.2699	1887.87	44.8728	2589.78	23.3589	73	39.675			JonE_big_UPB-028	526.659	214200	313.757	3.04398	2898.72	342.083	1615.37	0.0942414	405.011	1325.29	194.974	954.532	256.62	14.0299	258.967	40.9543	280.76	50.6183	144.229	17.0507	100.665	10.3423	0.00716905	0.103928	61.6309		2879.81	0.211768
JonE_big_UPB-029	0.343583	0.00642846	2.90628	0.0553875	0.166486	0.00116537	-0.105179		1903.88	35.6217	1906.27	36.3295	2521.88	17.6527	76	34.9444			JonE_big_UPB-029	122.812	214827	294.613	2.74745	2900.03	355.482	1532.74	0.116711	437.34	1374.11	198.244	959.909	253.021	14.4084	255.287	40.1779	272.585	48.0301	133.987	15.5258	87.6389	8.78047	0.00509016	0.19428	62.7078		2969.6	0.231925
JonE_big_UPB-030	0.342424	0.00631124	2.91687	0.0541673	0.16478	0.00115719	0.303032		1898.31	34.988	1900.28	35.2888	2504.56	17.5886	76	34.2715			JonE_big_UPB-030	138.111	212869	296.31	2.87683	2851.98	340.632	1547.84	0.110758	436.259	1367.84	197.025	950.767	251.271	14.0457	252.727	40.0245	271.994	48.6368	135.898	15.8093	89.1382	9.08248	0.00472389	0.187806	62.599		2951.9	0.220068
JonE_big_UPB-031	0.344899	0.00635687	2.89373	0.0538346	0.165429	0.00115614	0.0540391		1910.19	35.2069	1913.43	35.5972	2511.17	17.55	76	34.0101			JonE_big_UPB-031	158.024	213190	318.191	2.87554	2992.91	343.611	1550.48	0.118745	438.664	1366.02	196.632	951.988	251.416	14.0255	253.509	39.9369	274.932	48.2584	135.52	15.947	91.2928	9.42168	0.00990251	0.235764	63.261		2953.31	0.221616
JonE_big_UPB-032	0.342366	0.00632137	2.91722	0.0549798	0.166244	0.00116401	-0.132349		1898.03	35.0449	1900.08	35.8101	2519.43	17.6406	75	35.1176			JonE_big_UPB-032	175.895	214273	271.073	3.05538	2867.4	325.562	1613.7	3.25134	410.587	1324.38	192.51	944.184	250.769	13.2817	253.158	40.3341	279.015	50.8571	148.311	18.1779	111.017	12.0877	0.0968643	0.21438	62.9116		2871.66	0.201749
JonE_big_UPB-033	0.387922	0.00755927	2.57398	0.0509967	0.237456	0.0026632	-0.363764		2113.18	41.1786	2115.88	41.9205	3102.29	34.7939	68	54.7836			JonE_big_UPB-033	635.507	214522	189.18	3.10271	2385.5	292.03	1413.44	0.100495	163.886	721.151	121.445	656.36	201.343	10.9329	218.128	35.3771	247.208	44.5139	125.767	14.4536	80.9927	7.88544	0.00686479	0.00182929	24.2849		1662.84	0.206609
JonE_big_UPB-034	0.408455	0.0375869	2.46737	0.135821	0.231279	0.0143708	-0.886545	X	2207.85	203.171	2193.34	120.736	3060.21	190.15	72	48.1494			JonE_big_UPB-034	1042.13	215607	285.043	3.34957	2623.41	303.996	1613.05	0.552016	283.292	1123.41	188.924	959.833	261.276	13.7095	262.823	41.4568	286.232	50.8874	142.943	16.4357	92.3598	9.08017	0.0290142	0.0075622	33.9988		2555.46	0.18846
JonE_big_UPB-035	0.354809	0.00653952	2.81385	0.0531799	0.181457	0.0013281	0.193094		1957.52	36.0791	1960.26	37.0476	2665.49	19.509	74	40.078			JonE_big_UPB-035	128.292	214208	273.863	3.97773	2601.25	308.571	1592.87	0.0676805	351.539	1219.54	181.854	894.52	242.765	13.0885	249.047	40.0603	277.362	49.8681	141.093	16.4058	92.0741	9.19561	0.0104987	0.0117962	45.7513		2647.45	0.19372
JonE_big_UPB-036	0.342243	0.0063079	2.91737	0.0542844	0.163008	0.00115292	0.178879		1897.44	34.972	1900	35.3539	2486.36	17.5854	76	33.2975			JonE_big_UPB-036	246.42	214471	289.878	3.20777	2781.04	339.084	1562.32	0.0739488	435.87	1346.6	192.093	924.999	245.219	13.9838	248.784	39.8153	275.082	49.0774	139.138	16.166	92.8639	9.35366	0.0107827	0.0605496	64.4185		2899.56	0.217039
JonE_big_UPB-037	0.343079	0.00632333	2.90952	0.0540307	0.165584	0.00135599	0.146449		1901.46	35.046	1904.44	35.366	2512.75	20.5772	76	34.5621			JonE_big_UPB-037	110.532	214568	303.913	3.56861	2748.65	337.22	1569.32	0.0749898	434.524	1350.54	193.113	931.706	246.734	14.1061	250.013	39.8544	275.093	49.0808	138.883	16.2302	92.1531	9.28523	0.00797734	0.0441657	62.037		2909.88	0.214883
JonE_big_UPB-038	0.347707	0.00640863	2.87066	0.0533091	0.168513	0.00120695	0.230124		1923.64	35.4547	1926.72	35.7798	2542.18	18.208	76	35.0308			JonE_big_UPB-038	165.181	212852	303.117	3.16019	2581.04	306.527	1591.17	0.0786505	373.91	1251.5	185.374	908.98	242.231	12.8394	251.298	39.9943	277.966	50.28	142.705	16.5857	93.7154	9.30508	0.00960062	0.0186865	55.1271		2719.76	0.192643
JonE_big_UPB-039	0.31296	0.0163978	3.18901	0.181731	0.223331	0.00222984	0.521418	X	1755.25	91.9679	1758.28	100.198	3004.14	29.9948	59	67.1085			JonE_big_UPB-039	127.342	214751	290.911	3.84783	2605.35	301.622	1585.9	15.2641	265.762	1056.22	165.55	849.75	237.06	12.2339	245.912	39.5787	277	50.0369	141.205	16.3536	91.6102	9.02183	0.313344	0.00742752	43.0951		2337.28	0.19019
JonE_big_UPB-040	0.352791	0.00654957	2.83133	0.0537168	0.184632	0.00136344	0.146944		1947.91	36.1629	1949.81	36.9925	2694.19	19.8957	72	42.1444			JonE_big_UPB-040	285.01	214241	266.004	2.9554	2522.66	300.438	1586.15	0.0821178	321.384	1176.54	178.028	888.372	241.733	12.5092	247.969	39.7411	278.326	50.0756	142.478	16.4118	92.2989	9.0397	0.00516637	0.00211074	43.4546		2564.33	0.189413
JonE_big_UPB-041	0.438787	0.00812735	2.27275	0.0434478	0.265754	0.00251004	0.224288	X	2345.2	43.4386	2350.61	44.9361	3280.45	30.9837	72	51.8693			JonE_big_UPB-041	113.487	217529	261.621	3.22164	2882.23	300.91	1538.15	0.0486827	124.433	585.521	102.742	569.826	191.966	11.1839	217.631	36.7646	264.017	48.1204	139.142	16.5665	95.642	9.97257	0.0116784	<0.000	19.7235		1382.52	0.195631
JonE_big_UPB-042	0.351844	0.00656564	2.83856	0.0538737	0.176994	0.00182294	-0.210006		1943.39	36.265	1945.53	36.9246	2624.16	27.0274	74	38.5433			JonE_big_UPB-042	478.684	216469	267.315	3.5891	2637.97	315.204	1546.83	0.0994421	392.434	1278.25	187.458	916.63	243.229	12.8724	247.882	39.5363	271.76	48.528	137.174	15.6669	87.6959	8.63238	0.00970677	0.0253533	54.2461		2774.77	0.203774
JonE_big_UPB-043	0.358568	0.00693392	2.78567	0.0565883	0.192568	0.00142369	0.101801		1975.38	38.1994	1977.33	40.1677	2763.49	20.4309	72	44.4672			JonE_big_UPB-043	84.5763	215693	260.343	2.96489	2663.77	306.02	1552.77	0.0930364	253.476	976.198	152.856	785.411	226.213	12.4443	239.123	38.8016	272.703	48.5994	138.018	15.8972	88.8615	8.82673	0.00712519	0.00366235	40.3762		2167.94	0.197081
JonE_big_UPB-044	0.352159	0.00649966	2.83377	0.0534122	0.184975	0.00151418	0.256003		1944.89	35.8961	1948.36	36.7236	2697.25	22.0794	72	42.4651			JonE_big_UPB-044	77.4513	213471	271.599	2.97308	2685.83	309.347	1543.17	0.0856382	343.935	1216.09	180.071	902.198	244.46	12.8763	249.127	39.7524	271.566	48.3454	135.743	15.5837	86.8923	8.50067	0.0117861	0.00669648	45.3258		2642.3	0.200462
JonE_big_UPB-045	0.352214	0.00650241	2.83578	0.0536324	0.179044	0.00130518	0.398689		1945.16	35.9105	1947.17	36.8263	2643.29	19.2689	74	39.5052			JonE_big_UPB-045	190.709	214821	252.104	3.10342	2579.17	310.804	1543.18	0.0880047	357.595	1226.48	181.633	900.179	241.722	12.6969	247.106	39.508	271.745	48.2467	135.816	15.5811	86.3516	8.5905	0.00919307	0.00614026	48.3429		2665.89	0.201405
Standard data
Analysis	206Pb/238U	Uncertainty[06/38] 2SE	238U/206Pb	Uncertainty[38/06] 2SE	207Pb/206Pb	Uncertainty[07/06] 2SE	Rho[38/06][07/06]		206Pb/238U Age (Ma)	Uncertainty[06/38] 2SE	238U/206Pb Age (Ma)	Uncertainty[38/06] 2SE	207Pb/206Pb Age (Ma)	Uncertainty[07/06] 2SE	Concordance [38/06][07/06]	Concordance [logratio distance]			29Si	29Si 2SE	31P	31P 2SE	35Cl	35Cl 2SE	43Ca	43Ca 2SE	47Ti	47Ti 2SE	55Mn	55Mn 2SE	88Sr	88Sr 2SE	89Y	89Y 2SE	90Zr	90Zr 2SE	139La	139La 2SE	140Ce	140Ce 2SE	141Pr	141Pr 2SE	146Nd	146Nd 2SE	147Sm	147Sm 2SE	153Eu	153Eu 2SE	157Gd
MAD-001	0.0765404	0.00132887	13.1192	0.230037	0.0563766	0.00148889	-0.0483704		475.438	8.25438	473.544	8.30329	466.241	12.3133	102	-0.415878			4485.8	104.758	200248	4242.24	1007.32	88.5808	393600	2378.13	3.6892	0.356626	252.87	2.96286	2218.23	25.5515	292.002	3.16226	18.7354	0.237135	2182.89	22.702	4358.53	46.0606	463.65	4.15723	1645.08	19.9237	208.758	2.50748	30.1715	0.35969	128.18
MAD-002	0.0759983	0.00131945	13.2156	0.231728	0.056447	0.00149698	-0.127422		472.191	8.19801	470.212	8.24487	469.007	12.4381	100	-0.14421			4416.18	95.117	200669	4273.43	977.052	85.6418	393600	2378.13	3.14904	0.541275	252.088	3.29013	2212.84	27.2193	288.493	3.80115	18.5486	0.257141	2179.7	24.5812	4362.38	50.7718	462.465	4.63399	1643.55	22.3775	208.95	2.55429	30.0674	0.351286	127.176
MAD-003	0.0760348	0.00132009	13.1871	0.231227	0.0564166	0.00149971	-0.216686		472.41	8.20181	471.194	8.26209	467.813	12.4358	101	-0.208023			4202.43	87.4723	189280	4203.59	986.763	89.6815	393600	2378.13	3.21429	0.36308	244.067	3.37437	2164.38	26.673	282.861	4.25865	17.9824	0.252362	2114.55	23.6698	4217	49.7876	447.265	4.63782	1581.56	21.4724	201.8	2.48346	28.9406	0.343951	123.116
MAD-004	0.0763806	0.00132609	13.1177	0.230012	0.0564806	0.00148908	-0.0677422		474.481	8.23777	473.595	8.30419	470.322	12.3997	101	-0.188333			4182.22	78.3737	186796	4069.43	984.763	85.5628	393600	2378.13	2.78528	0.297505	241.936	2.92003	2157.14	24.5931	284.091	3.83459	17.8618	0.22485	2114.09	21.0077	4217.64	44.1122	446.162	4.47484	1582.14	20.1992	200.669	2.25757	28.7513	0.366879	122.076
MAD-005	0.0769769	0.00133645	13.0026	0.227993	0.0564462	0.00150094	-0.090712		478.052	8.29976	477.637	8.37507	468.974	12.4703	102	-0.41067			4197.97	80.8873	187827	4374.28	976.972	84.9626	393600	2378.13	2.57444	0.376677	241.681	3.28509	2148.4	27.2167	280.301	3.851	17.9789	0.243265	2117.48	22.1772	4189.5	46.702	448.757	4.54409	1577.14	22.6176	199.218	2.31939	28.8248	0.310206	121.718
MAD-006	0.076629	0.0013304	13.0512	0.228845	0.056431	0.00150697	0.0294283		475.968	8.26359	475.921	8.34498	468.377	12.5079	102	-0.343421			4215.3	95.1692	187642	4057.62	965.039	81.6649	393600	2378.13	2.89916	0.368858	243.225	3.29635	2157.52	26.7037	286.443	4.10769	18.1689	0.239725	2122.57	23.0091	4199.56	47.5518	447.86	4.32908	1585.94	21.3075	201.969	2.35817	29.1076	0.297846	122.838
MAD-007	0.07577	0.00131549	13.1741	0.230999	0.0564426	0.00150588	0.266972		470.823	8.17426	471.642	8.26995	468.833	12.5084	101	-0.0902349			4251.81	83.6559	191817	4134.02	1024.6	80.5991	393600	2378.13	2.70792	0.389464	244.547	2.89983	2155.5	24.0255	287.996	3.90567	18.2987	0.252769	2139.9	22.6666	4260.46	46.102	451.046	4.32903	1597.4	21.0953	202.352	2.99252	29.2769	0.331023	124.372
MAD-008	0.074905	0.00130047	13.3281	0.233701	0.0565154	0.00151358	-0.082969		465.638	8.08424	466.382	8.17773	471.685	12.6325	99	0.272809			4115.91	87.8916	192790	4233.75	963.787	78.5492	393600	2378.13	2.98778	0.42846	242.165	3.44324	2148.05	27.8339	281.334	4.19307	17.9847	0.255921	2097.76	23.9659	4211.5	47.3409	448.111	4.8648	1573.98	22.0166	200.033	2.78926	28.7397	0.324351	121.47
MAD-009	0.0759688	0.00131894	13.1404	0.230409	0.056523	0.00152019	-0.237778		472.014	8.19494	472.808	8.29039	471.985	12.6941	100	-0.00167769			4258.55	77.8391	193044	4130.82	1031.51	69.5863	393600	2378.13	2.83553	0.376015	244.518	2.87472	2177.99	24.5401	284.504	3.59969	18.179	0.226645	2121.51	20.9395	4221	43.3145	448.014	4.49369	1586.65	21.1329	202.373	2.61731	29.3357	0.33108	123.15
MAD-010	0.075742	0.00131501	13.1649	0.230838	0.0565311	0.00151957	0.0945027		470.656	8.17135	471.96	8.27553	472.3	12.6955	100	0.0739895			4122.21	85.946	192556	4222.17	1006.94	70.2044	393600	2378.13	2.90958	0.376673	243.208	3.09915	2142.92	26.3228	287.313	3.80194	18.0607	0.245749	2131.88	23.1531	4217.02	45.0872	447.709	4.694	1587.42	20.3081	201.947	2.65434	28.9692	0.305074	122.94
MAD-011	0.076124	0.00132164	13.0875	0.229481	0.056507	0.00152107	0.194022		472.944	8.21109	474.651	8.32271	471.358	12.6881	101	-0.0720541			4294.19	75.155	194842	4185.95	1008.6	63.6342	393600	2378.13	2.88933	0.402227	242.676	3.17118	2164.62	25.6542	285.782	3.43694	17.7871	0.222952	2144.47	21.9846	4251.7	43.6701	453.42	4.50052	1610.64	16.9502	205.018	2.08946	29.4711	0.313152	124.78
MAD-012	0.0766961	0.00133157	13.0119	0.228156	0.0565888	0.00152083	-0.247841		476.37	8.27057	477.308	8.3693	474.559	12.7538	101	-0.0822488			4298.14	99.2562	193920	4167.12	1015.81	62.386	393600	2378.13	3.04108	0.482001	245.13	3.2744	2179.38	25.3641	281.933	3.4647	17.8537	0.227287	2135.06	21.8224	4235.2	43.1453	449.591	4.44038	1590.47	16.4312	202.925	1.78982	29.3352	0.355904	123.738
MAD-013	0.0775244	0.00134595	12.8731	0.225722	0.0565212	0.00151821	-0.00778083		481.328	8.35664	482.267	8.45625	471.913	12.676	102	-0.426161			4293.52	84.9527	196989	4136.36	887.707	53.9942	393600	2378.13	2.67264	0.386157	247.654	3.11643	2192.09	26.2633	284.999	3.94734	18.0326	0.213307	2148.11	21.8104	4269.35	46.6702	452.263	4.10271	1583.78	20.1538	203.533	1.92258	29.6365	0.323213	124.813
MAD-014	0.0766279	0.00133039	13.0189	0.228279	0.0565467	0.00150819	-0.244269		475.962	8.26348	477.06	8.36495	472.91	12.6133	101	-0.138304			4299.43	85.2737	194737	4302.39	932.367	63.2821	393600	2378.13	3.01074	0.486101	245.894	3.22935	2184.64	27.6082	284.624	4.17541	18.5154	0.306793	2137.08	25.4953	4239.49	48.7029	449.002	4.52681	1601.58	20.1157	201.85	2.23253	29.3785	0.341926	123.789
MAD-015	0.0776909	0.00134884	12.8466	0.225257	0.0565795	0.00152935	-0.259839		482.323	8.37392	483.225	8.47305	474.193	12.8175	102	-0.368159			4156.39	86.4222	193822	4404.69	990.828	58.6825	393600	2378.13	2.84074	0.397406	245.756	3.6276	2160.32	28.0283	280.758	3.49457	18.0016	0.268839	2129	27.5267	4225.75	52.376	447.908	4.92063	1589.03	19.2492	202.264	2.33144	29.209	0.410318	122.997
MAD-016	0.0757137	0.00131451	13.1818	0.231134	0.0565741	0.00154048	-0.276977		470.486	8.16841	471.376	8.26529	473.984	12.9063	99	0.157754			4206.52	90.3854	195562	4328.43	959.654	54.3858	393600	2378.13	2.91055	0.418464	247.244	3.39653	2187.8	26.4669	282.338	3.57537	18.2397	0.248963	2143.53	27.3534	4262.11	46.0392	452.813	4.90158	1585.3	15.5051	202.964	2.01857	29.2423	0.360556	123.704
MAD-017	0.0756429	0.00131328	13.1908	0.231292	0.0565626	0.00155294	0.118302		470.061	8.16103	471.067	8.25986	473.534	13.001	99	0.156592			4242.99	80.7539	195183	4278.07	967.758	67.5857	393600	2378.13	2.6539	0.386856	245.89	3.03508	2173.41	26.7187	283.312	3.79698	17.7091	0.252438	2143.49	23.4451	4256.58	46.68	449.238	4.68638	1580.09	20.5863	202.561	2.27855	29.4042	0.358291	122.826
MAD-018	0.0763574	0.00132569	13.0849	0.229435	0.0565876	0.00155094	-0.13354		474.342	8.23536	474.742	8.3243	474.51	13.0053	100	0.00723732			4254.58	82.097	197286	4500.24	921.547	64.5756	393600	2378.13	2.56225	0.387863	247.891	3.25581	2181.54	28.2493	278.802	3.31666	17.9981	0.261351	2132.33	24.8746	4276.89	47.2966	449.824	4.97203	1562.47	19.2412	200.853	2.13207	28.9867	0.338758	122.305
MAD-019	0.0757426	0.00131502	13.1758	0.23103	0.0565214	0.00155415	0.164029		470.659	8.17142	471.581	8.26888	471.92	12.9762	100	0.0566197			4282.39	74.5487	199089	4161.69	921.215	64.5906	393600	2378.13	2.7094	0.306965	248.421	3.11012	2196.37	28.2172	281.378	3.35369	18.2375	0.273531	2161.61	24.0166	4309.31	48.7484	454.79	4.71974	1586.47	20.8505	204.506	2.15165	29.3833	0.366084	124.032
MAD-020	0.07582	0.00131636	13.1772	0.231055	0.0565442	0.00155434	0.0370214		471.123	8.17946	471.533	8.26804	472.812	12.9971	100	0.0760205			4235.85	84.5968	196215	4379.94	932.105	66.3735	393600	2378.13	2.82304	0.31223	247.536	3.31031	2176.71	26.1091	281.175	3.29264	18.2531	0.259084	2149.75	23.3986	4262.43	44.9583	449.346	4.4163	1581.61	18.138	203.805	2.10203	29.3748	0.348796	124.079
MAD-021	0.0763623	0.00132577	13.1018	0.229731	0.0565901	0.00157141	-0.0872412		474.372	8.23587	474.152	8.31396	474.606	13.179	100	0.0102701			4343.38	78.3953	197336	4218.09	931.944	77.6923	393600	2378.13	2.75654	0.498078	247.449	3.29442	2195.87	28.3197	277.987	3.08931	18.0223	0.244818	2157.97	22.9334	4291.09	46.8804	456.386	4.62869	1568.45	15.4086	204.038	2.07755	29.6848	0.390122	124.43
MAD-022	0.0755525	0.00131171	13.2442	0.232228	0.0566315	0.00156926	-0.227769		469.52	8.15163	469.235	8.22774	476.227	13.1963	99	0.302822			4321.15	88.6055	198267	4398	973.235	81.6722	393600	2378.13	3.09432	0.53714	247.197	3.27496	2189.41	28.7695	278.91	3.4131	18.0382	0.273219	2158.66	24.2871	4313.81	53.279	453.965	4.80327	1561.37	16.4737	204.118	2.60298	29.6331	0.387919	123.959
MAD-023	0.0763264	0.00132515	13.1384	0.230374	0.0567015	0.00156651	-0.179698		474.156	8.23213	472.877	8.2916	478.955	13.2323	99	0.216679			4222.44	84.7037	195964	4049.86	977.868	81.9182	393600	2378.13	2.63944	0.303809	247.313	3.18154	2163.03	25.3462	279.231	3.13085	17.6962	0.229243	2137.46	20.9967	4214.98	41.8572	445.051	4.46338	1554.27	17.242	201.029	1.85696	28.8973	0.314107	122.156
MAD-024	0.0755916	0.00131239	13.2859	0.23296	0.0566348	0.00159635	0.0333103		469.754	8.1557	467.813	8.20281	476.354	13.4268	98	0.29801			4192.52	74.1404	194325	4149.59	918.897	90.4593	393600	2378.13	2.35227	0.293893	248.709	3.16373	2174.99	25.0501	275.054	2.93361	18.0696	0.218537	2133.36	22.8288	4288.53	44.9426	445.993	4.34575	1536.12	15.2511	201.414	2.10129	28.8024	0.402973	122.015
MAD-025	0.0773216	0.00134243	12.9853	0.227689	0.0565914	0.00158006	0.025289		480.114	8.33557	478.25	8.38582	474.658	13.2527	101	-0.247147			4317.73	91.6081	197226	4442.67	931.385	89.9238	393600	2378.13	2.27507	0.354634	251.022	3.46968	2184.15	25.8821	277.149	2.89346	17.9665	0.260317	2152.56	23.8341	4289.37	50.0012	448.756	4.78578	1562.64	18.5492	201.589	2.37145	29.1874	0.331588	122.404
401-001	0.0852664	0.00172685	11.7574	0.237548	0.0696895	0.00330374	0.0720504		527.479	10.6827	526.21	10.6316	918.302	43.5335	57	18.4034			1176.79	54.9343	216217	4530.2	3758.55	310.68	397400	2401.09	3.56394	0.47543	125.285	1.5539	474.26	5.70996	1577.58	16.275	0.560731	0.0318341	3764.23	40.6427	8534.38	83.1691	903.424	9.18268	3266.72	33.7992	455.869	5.22532	46.1278	0.542693	387.644
401-002	0.085466	0.00170069	11.7531	0.232355	0.0676457	0.00250734	0.237315		528.665	10.5199	526.395	10.4066	856.791	31.7576	61	15.3798			1176.36	60.2342	214465	4596.99	3726.74	308.474	397000	2398.68	3.51491	0.369493	125.803	1.81367	470.605	5.41073	1573.51	16.9479	0.559184	0.0334322	3753.71	43.0821	8460.53	89.3019	895.663	8.98334	3263.88	34.0949	452.648	4.85447	45.526	0.489594	385.562
401-003	0.0873438	0.0018062	11.4772	0.22614	0.0686166	0.00262676	0.149501		539.807	11.1628	538.535	10.611	886.314	33.9296	61	16.2939			1024.66	58.4989	204684	4263.45	3782.97	311.828	397000	2398.68	3.05699	0.381103	122.755	1.59436	463.24	5.49797	1554.36	16.4662	0.56191	0.0302814	3673.07	37.6711	8301.62	84.4129	877.491	7.88751	3202.41	31.6935	444.886	4.87295	44.3163	0.472835	376.537
401-004	0.0870171	0.00174017	11.5292	0.227546	0.068205	0.00266341	0.0270828		537.87	10.7563	536.203	10.5827	873.866	34.1245	61	15.7819			1095.56	45.7407	205128	4254.74	3757.24	309.837	397000	2398.68	2.99399	0.378104	122.448	1.52694	463.578	5.5097	1550.16	15.6425	0.508799	0.0319245	3691.65	38.7699	8303.89	87.3087	880.627	8.56323	3221.58	34.3725	447.562	5.23648	44.435	0.487665	376.802
401-005	0.0848733	0.00169388	11.7864	0.233509	0.0665756	0.00286754	0.0603095		525.144	10.4807	524.967	10.4005	823.594	35.4738	64	13.9484			996.335	58.3223	204281	4471.47	3690.59	295.608	397000	2398.68	2.96717	0.330546	121.306	1.63707	464.552	5.42156	1558.55	16.7751	0.516946	0.0299281	3698.62	41.4772	8320.45	95.5986	882.271	8.75321	3244.17	32.8069	449.225	5.20151	44.8531	0.501746	379.456
401-006	0.0861307	0.00171358	11.6102	0.230457	0.069339	0.00260719	0.0463642		532.611	10.5964	532.612	10.5721	907.922	34.1385	59	17.6667			1023.3	48.2781	205481	4392.51	3704.29	296.915	397000	2398.68	2.85268	0.309496	121.019	1.62233	462.091	5.34547	1559.47	15.3099	0.518973	0.0349744	3705.09	38.3513	8284.34	85.4956	884.827	8.26591	3235.02	29.5595	448.193	4.60366	44.9471	0.47792	378.534
401-007	0.0864604	0.00177281	11.5627	0.230662	0.070928	0.00229913	0.320948		534.567	10.9609	534.714	10.6669	954.426	30.9378	56	19.8365			1079.57	63.988	210207	4577.61	3884.47	289.975	397000	2398.68	3.02552	0.377478	122.569	1.59207	465.703	5.8065	1555.89	17.0749	0.536382	0.0309094	3703.43	37.4912	8332.16	87.0141	883.446	8.56709	3221.23	33.2681	446.104	6.34511	44.8945	0.475813	376.591
401-008	0.0857312	0.00170453	11.6615	0.231215	0.0681896	0.00316616	-0.0332327		530.24	10.5424	530.365	10.5156	873.4	40.5535	61	16.1073			1063.11	53.8798	207623	4422.68	3799.36	288.64	397000	2398.68	3.16278	0.597985	120.671	1.73583	459.312	5.42192	1538.44	16.5047	0.533477	0.032043	3650.32	38.3389	8271.83	91.2948	873.559	8.38942	3193.16	38.6512	439.67	6.19328	44.5603	0.481963	372.694
401-009	0.0847567	0.00179975	11.774	0.241246	0.0669134	0.00217733	0.000149294		524.451	11.1364	525.499	10.7673	834.15	27.1429	63	14.4853			1070.27	58.8885	211218	4650.22	3993.81	253.756	397000	2398.68	2.93394	0.315635	121.456	1.79608	461.004	6.12141	1519.87	18.033	0.525419	0.0349473	3611.46	41.3518	8191.01	93.9382	868.136	8.98349	3176.9	36.1522	440.622	6.00501	44.2123	0.437198	373.44
401-010	0.084945	0.00168369	11.7466	0.233459	0.0648038	0.00231385	0.0247887		525.57	10.4173	526.673	10.4674	767.034	27.3874	69	11.235			1104.54	58.447	213794	4658.26	4074.58	264.951	397000	2398.68	3.05892	0.378232	122.622	1.67017	464.228	6.27916	1515.72	19.1792	0.522696	0.0431421	3578.75	43.2639	8177.05	92.8472	861.281	10.6935	3149.4	37.6962	434.831	5.99654	44.2459	0.527749	370.024
401-011	0.0841418	0.00174257	11.8504	0.250189	0.0685533	0.00225499	0.0264664		520.796	10.7857	522.246	11.0258	884.404	29.0916	59	17.0678			1129.81	53.961	213033	4432.11	3850.86	220.015	397000	2398.68	3.16874	0.47972	122.125	1.56039	465.199	5.8849	1521.57	17.9612	0.521695	0.0281734	3612.51	40.6536	8223.43	91.7614	871.373	8.80132	3201.03	27.9118	444.129	4.24787	44.7967	0.521643	375.269
401-012	0.0856492	0.00175474	11.635	0.23822	0.0654021	0.00225325	0.252508		529.753	10.8533	531.525	10.8827	786.361	27.092	68	11.9624			1110.53	54.5802	214397	4682.85	3937	221.655	397000	2398.68	2.88015	0.406778	123.017	1.63168	468.332	5.67764	1558.32	17.3074	0.538398	0.0328215	3732.87	37.1982	8408.78	88.2768	887.625	9.03729	3262.88	25.895	450.994	4.68353	45.3056	0.501285	382.489
401-013	0.0852449	0.00173171	11.6964	0.237564	0.0661885	0.00249102	0.347154		527.352	10.7129	528.847	10.7414	811.409	30.5376	65	13.2655			1036.47	60.0313	212030	4485.13	3588.71	206.051	397000	2398.68	2.86514	0.42897	122.843	1.54413	462.125	5.98174	1525.57	16.697	0.521009	0.0281766	3633.92	38.4317	8233.2	94.2986	871.85	8.58792	3167.26	23.2582	437.977	3.73017	44.2395	0.500401	372.047
401-014	0.0860828	0.00172239	11.5741	0.229855	0.0673388	0.00213498	0.371426		532.327	10.6511	534.206	10.609	847.342	26.865	63	14.759			1056.6	60.5607	213752	4947.8	3627.14	204.743	397000	2398.68	3.01104	0.442237	122.782	1.75533	466.304	6.32513	1550.14	17.4102	0.533585	0.032457	3747.33	41.2976	8393.97	90.5446	890.318	9.2675	3242.77	28.3333	447.164	4.50089	45.3388	0.503066	378.374
401-015	0.0861894	0.00176807	11.5792	0.230161	0.0692906	0.00221134	0.058027		532.959	10.933	533.982	10.614	906.485	28.9296	59	17.5812			1041.97	57.348	210842	4778.32	3804.46	202.611	397000	2398.68	2.85457	0.443325	122.439	1.88112	464.734	6.42146	1539.53	17.8099	0.5227	0.0279903	3689.7	41.1684	8335.32	96.3495	878.16	10.3986	3214.45	27.2958	444.928	4.93537	44.8067	0.590327	375.55
401-016	0.084997	0.00169012	11.7214	0.233873	0.0667069	0.0023942	0.20393		525.879	10.4568	527.764	10.5303	827.704	29.7074	64	14.1116			1072.39	63.951	214500	4440.36	3775.75	197.096	397000	2398.68	2.8506	0.340117	123.071	1.48267	470.007	5.34602	1533.29	15.281	0.506135	0.0391519	3635.95	37.7575	8191.04	83.5868	868.892	7.83331	3198	21.916	442.622	4.33134	44.3818	0.491546	371.492
401-017	0.0857889	0.00172164	11.6333	0.231605	0.067769	0.00215616	0.171277		530.582	10.6479	531.6	10.5835	860.573	27.3802	62	15.4742			1049.57	50.8045	212482	4597.08	3725.83	241.226	397000	2398.68	2.82207	0.521699	122.669	1.57839	467.277	5.64298	1545.04	16.2578	0.516286	0.0303773	3705.11	39.5428	8424.14	87.468	885.615	8.77165	3235.71	28.1537	448.253	4.01713	44.9953	0.527367	378.456
401-018	0.0851539	0.00169431	11.7183	0.233344	0.065216	0.00253923	0.291083		526.811	10.482	527.898	10.5119	780.376	30.3844	68	11.8119			1091.74	59.1449	215518	4633.35	3754.68	247.493	397000	2398.68	3.23729	0.574071	123.387	1.68018	467.902	6.20306	1531.01	18.1185	0.51935	0.0312041	3681.75	39.7289	8342.99	93.893	876.042	8.04876	3197.17	27.7367	442.891	4.51645	44.5735	0.581607	374.789
401-019	0.085099	0.00174129	11.7516	0.235393	0.066191	0.00243627	0.360242		526.485	10.7729	526.461	10.5454	811.488	29.8682	65	13.3088			1108.79	61.2274	215143	4595.22	3490.21	225.141	397000	2398.68	2.52363	0.30081	123.027	1.68058	465.71	5.97835	1501.8	15.7175	0.507926	0.0298871	3508.53	36.9463	7964.46	83.9259	837.292	8.08265	3080.45	25.9018	427.52	3.70319	43.1699	0.501181	363.088
401-020	0.0843171	0.00179744	11.8423	0.246415	0.0678257	0.00233492	-0.00552376		521.838	11.1244	522.585	10.8739	862.308	29.6852	61	15.9559			1102.3	47.2363	215353	4557.67	3542.84	224.423	397000	2398.68	2.66854	0.342983	122.824	1.63923	465.288	5.73401	1497.01	14.4737	0.486026	0.0287455	3494.69	34.7162	7930.81	79.1233	834.999	7.40912	3078.04	25.267	426.679	3.64474	43.0942	0.447137	362.231
401-021	0.0850823	0.00171311	11.7592	0.235404	0.0669746	0.00243479	0.286483		526.386	10.5986	526.135	10.5326	836.053	30.3938	63	14.4883			1118.11	51.6463	216551	4617.53	3594.03	277.341	397000	2398.68	2.71293	0.412153	122.887	1.57301	463.702	6.66342	1476.26	15.0475	0.500201	0.0340758	3465.08	37.2997	7821.41	87.3086	832.171	7.98974	3071.85	28.1717	425.409	4.30634	43.057	0.472817	361.905
401-022	0.0842557	0.00171384	11.8717	0.238519	0.0675891	0.00263446	0.117224		521.473	10.6073	521.344	10.4745	855.054	33.3279	61	15.6238			1146.59	54.1301	217211	4636.96	3585.19	277.566	397000	2398.68	2.92739	0.386561	123.654	1.48648	465.167	6.68613	1522.98	15.6914	0.510783	0.0317267	3613.84	38.021	8153.03	86.501	865.18	8.91705	3177.07	30.3982	439.735	4.23768	44.2715	0.532123	375.134
401-023	0.0849768	0.00168622	11.7874	0.235377	0.067755	0.00231888	-0.0365826		525.759	10.4328	524.922	10.4819	860.144	29.438	61	15.6734			1076.51	62.3261	214198	4875.74	3747.09	287.885	397000	2398.68	2.59085	0.30717	123.313	1.7494	466.229	6.34427	1515.45	19.3397	0.517747	0.0342367	3609.12	39.3794	8146.92	93.437	865.778	9.07945	3151.98	33.0275	432.934	4.78032	43.6659	0.472063	364.873
401-024	0.0857707	0.0017483	11.7032	0.23438	0.0696871	0.00256541	0.0787012		530.474	10.8129	528.549	10.5852	918.23	33.803	58	18.2635			1060.67	49.3986	211631	4639.31	3617.14	334.839	397000	2398.68	2.55712	0.397781	124.76	1.69623	463.271	6.00419	1512.83	15.7269	0.511854	0.0313677	3612.13	38.4585	8261.52	87.3801	858.02	8.39069	3163.43	28.1188	434.182	4.81029	43.5105	0.488155	364.285
401-025	0.0853114	0.0017584	11.7747	0.240757	0.0663328	0.00277374	0.331452		527.747	10.8777	525.47	10.7443	815.961	34.1199	64	13.465			1015.32	50.3087	215836	4771.29	3568.41	331.498	397000	2398.68	2.50116	0.355313	125.813	1.64164	463.383	7.26427	1510.25	17.3506	0.526077	0.0301105	3608.79	40.2088	8255.63	89.9457	862.599	8.9791	3145.87	30.3771	436.469	4.6934	44.0141	0.513588	363.866
[truncated: 46 more columns]

## Sheet: Table S7
Table S7 - Geochemical data from Aaltonen et al (2016) including metatexites, diatexites, injected pegmatitic granites and leucosomes. Diabase dykes from the Olkiluoto region were not included.
Number	Reference	Group	Hole_id	Length	Orig_Rock_type	Sample	SiO2	Al2O3	Fe2O3	MgO	CaO	Na2O	K2O	TiO2	P2O5	MnO	Cr2O3	LOI	Ag	As	Au	B	Ba	Be	Bi	Br	C	Cd	Ce	Cl	Co	Cr	Cs	Cu	Dy	Er	Eu	F	Ga	Gd	Ge	Hf	Hg	Ho	In	Ir	La	Lu	Mn
124	Kärki and Paulamäki 2006	TGG	OL-KR1	74.6	MGN	OL-KR1_74.6_124	60.04	16.96	7.02	2.29	3.61	3.76	2.96	1.12	0.68	0.08		0.65					679				0.01		235	70	13	17	13.9	19	6.04	2.81	2.4	1750		10.7		11		1.08			117	0.43	554
126	Kärki and Paulamäki 2006	TGG	OL-KR1	130.7	MGN	OL-KR1_130.7_126	61.41	16.89	6.79	2.17	4.38	2.95	2.74	1.09	0.6	0.1		0.85					1080				0.01		214	80	13	19	6.2		5.85	2.9	2.9	1620		10.2		12		1.03			107	0.36	751
127	Kärki and Paulamäki 2006	TGG	OL-KR1	145.35	QGN	OL-KR1_145.35_127	62.97	16.95	3	1.36	7.4	0.42	3.17	0.43	0.4	0.19		3.8					396				0.5		60.2	84		62	11.4		5.33	3.11	1.23	1520		5.58		3		1.07			29	0.43	1340
131	Kärki and Paulamäki 2006	TGG	OL-KR1	297.45	TGG	OL-KR1_297.45_131	66.53	15.94	5.07	1.18	1.9	3.9	3.9	0.67	0.33	0.07		0.5					897				0.02		170	120		22	7.3	20	4.88	2.47	2.01	783		8.3		9		0.93			84.2	0.35	474
132	Kärki and Paulamäki 2006	TGG	OL-KR1	333.9	TGG	OL-KR1_333.9_132	67.13	15.93	4.54	1.14	1.89	4.16	3.63	0.64	0.33	0.05		0.55					723				0.01		198	110		22	7.5	13	5.7	2.69	1.72	618		9.39		8		1.04			98.5	0.42	338
138	Kärki and Paulamäki 2006	TGG	OL-KR1	601.4	VGN	OL-KR1_601.4_138	63.4	15.73	7.16	2.44	1.7	3.09	4.74	0.79	0.34	0.06	0.02	0.55					511				0.02		114	120	11	118	10	13	4.81	2.24	1.24	1540		6.28		7		0.84			57.3	0.26	451
139	Kärki and Paulamäki 2006	TGG	OL-KR1	637.76	TGG	OL-KR1_637.76_139	60.73	16.58	7	2.75	4.37	2.56	2.86	1.09	0.55	0.09		1.1					1150				0.07		178	130	14	46	9	23	5.27	2.52	2.58	1730		8.68		9		0.93			87.3	0.32	674
147	Kärki and Paulamäki 2006	TGG	OL-KR5	151.45	TGG	OL-KR5_151.45_147	64.45	16.46	5.65	1.57	2.48	3.74	3.77	0.79	0.42	0.05		0.55					1200				0.01		213	120		26	8.6	24	5.33	2.47	2.5	846		9.67		10		0.94			108	0.3	383
149	Kärki and Paulamäki 2006	TGG	OL-KR5	225	TGG	OL-KR5_225_149	66.92	15.74	4.7	1.14	2.01	3.28	4.82	0.63	0.32	0.05		0.35					1010						169	150		22	8.5	15	5.05	2.58	2.16	1590		7.88		9		0.93			83.1	0.32	389
151	Kärki and Paulamäki 2006	High-P TGG	OL-KR5	325.75	MFGN	OL-KR5_325.75_151	50.51	15.54	10.18	4.36	7.34	3.44	2.64	2.23	1.55	0.15		0.8					892				0.01		258	220	24	50	5.3	27	7.42	3.33	4.82	3460		14.3		10		1.26			112	0.38	1060
152	Kärki and Paulamäki 2006	High-P TGG	OL-KR5	347.77	MFGN	OL-KR5_347.77_152	50.64	15.63	11.2	4.39	7.37	2.46	2.68	2	1.73	0.15		0.55					1200				0.02		251	275	29	15	5.4	49	7.15	3.17	4.38	3310		13.3		9		1.25			114	0.37	1090
153	Kärki and Paulamäki 2006	High-P TGG	OL-KR5	354.5	MFGN	OL-KR5_354.5_153	52.31	15.34	10.64	5.39	5.87	3.44	3	1.57	0.87	0.14	0.03	0.55					1240			0.5	0.01		234	350	31	227	2.8	85	6.53	2.94	3.6	2050		11.8		9		1.2			110	0.34	1060
154	Kärki and Paulamäki 2006	TGG	OL-KR5	378.55	TGG	OL-KR5_378.55_154	56.86	16.61	9.43	3.03	5.61	3.38	2.69	1	0.91	0.1		0.55					854						183	270	18	53	5.6	40	5.96	2.94	2.96	1850		10		5		1.12			91.5	0.35	772
53	Kärki and Paulamäki 2006	TGG	OL-KR6	357.05	VGN	OL-KR6_357.05_53	60.1	13.6	12.1	3.04	0.74	0.53	2.62	0.44	0.5	0.09	0.01	6.45					259			0.7				113			12					822
43	Kärki and Paulamäki 2006	TGG	OL-KR11	282	VGN	OL-KR11_282_43	53	16.9	5.1	1.88	5.62	1.7	7.73	0.63	3.93	0.09	0.01	1.9					984			1.7				119			5					2700
44	Kärki and Paulamäki 2006	TGG	OL-KR11	358.8	TGG	OL-KR11_358.8_44	65.5	16.4	5.43	1.29	2.26	3.88	3.63	0.74	0.38	0.06	0.02	0.45					1200			4.7				137			6					728
45	Kärki and Paulamäki 2006	TGG	OL-KR11	443.4	TGG	OL-KR11_443.4_45	63.6	15.9	5.81	1.56	2.24	3.71	4.04	0.77	0.38	0.05	0.09	0.65					707			0.3				114			9					1120
80	Kärki and Paulamäki 2006	TGG	OL-KR13	271.9	MGN	OL-KR13_271.9_80	54.9	16.56	9.56	3.55	5.85	1.75	3.2	1.99	1.19	0.14	0.01	0.7	2				1370			0.3	0.01		236	251	23	36	4.4	54	6.73	2.91	3.94	2660	23	12.3		10		1.16			109	0.4
81	Kärki and Paulamäki 2006	TGG	OL-KR13	282.15	TGG	OL-KR13_282.15_81	64.6	16.14	5.36	1.48	2.31	3.41	4.16	0.74	0.38	0.06	0.01	0.65	3				1030			0.3	0.02		221	203	8.7	29	7	50	5.72	2.81	2.33	1330	23	10.1		9		1.1			108	0.37
82	Kärki and Paulamäki 2006	TGG	OL-KR13	302.93	TGG	OL-KR13_302.93_82	65.1	15.88	4.96	1.3	2.34	3.58	4.29	0.68	0.34	0.05	0.01	0.5	3				933			0.3	0.01		184	230	7.8	24	7.7	21	5.03	2.42	2.25	1270	22	8.46		9		0.9			91.3	0.35
84	Kärki and Paulamäki 2006	TGG	OL-KR13	389.29	TGG	OL-KR13_389.29_84	66.1	15.67	4.91	1.32	2.17	3.58	4.19	0.66	0.34	0.08	0.01	0.55	2				912			1.1	0.01		178	223	7.4	23	8	15	5.09	2.52	2.16	1410	22	8.38		9		0.95			88.5	0.36
191	Kärki and Paulamäki 2006	TGG	OL-KR19	136.63	MGN	OL-KR19_136.63_191	59.32	17.36	7.42	2.67	2.04	2.76	2.77	1.12	0.69	0.08	0.01	3					778			0.3	0.13		212		11	22	4.3	41	9.68	4.43	2.19			12.8		13		1.73			112	0.55	641
193	Kärki and Paulamäki 2006	TGG	OL-KR19	206.72	TGG	OL-KR19_206.72_193	66.35	16.04	4.63	1.23	2.02	3.87	4	0.63	0.35	0.03	0.01	0.4					717			0.3	0.03		168		7	22	7.7	17	5.3	2.37	2.08			7.79		9		1			94.9	0.33	234
198	Kärki and Paulamäki 2006	High-P TGG	OL-KR19	365.5	MFGN	OL-KR19_365.5_198	47.92	16	11.29	4.07	6.06	3.59	4.1	2.56	1.41	0.16	0.01	1					1120			0.3	0.06		313		19	29	4.7	28	9.79	4.24	5.85			16.4		12		1.7			158	0.53	1160
202	Kärki and Paulamäki 2006	TGG	OL-KR19	467.54	MGN	OL-KR19_467.54_202	58.62	16.4	7.67	3.04	4.2	2.03	3.33	1.27	0.66	0.11	0.01	1.2					1270			0.3	0.03		218		14	55	7.1	19	6.8	3.33	3.24			10.7		11		1.26			120	0.48	796
208	Kärki and Paulamäki 2006	TGG	OL-KR20	47.46	MGN	OL-KR20_47.46_208	64.73	16.42	5.15	2.28	2.28	4.05	2.05	0.48	0.32	0.05	0.01	1.2					188			1.2	0.05		54.9		12	89	12.1	29	5.58	3.24	1.16			4.93		4		1.14			30.6	0.51	365
209	Kärki and Paulamäki 2006	TGG	OL-KR20	107.21	MGN	OL-KR20_107.21_209	59.52	16.73	6.94	2.37	4.49	2.88	2.72	1.14	0.63	0.1	0.01	0.6					1030			0.3	0.04		242		11	20	6.7	7	6.79	3.25	3.44			10.9		12		1.2			136	0.48	749
214	Kärki and Paulamäki 2006	TGG	OL-KR20	247.4	MGN	OL-KR20_247.4_214	53.6	16.3	8.83	4.06	5.89	1.24	3.58	1.9	1.39	0.14	0.01	1.1					1690			0.3	0.02		297		16	37	7.6	46	7.99	3.67	5.3			14.6		13		1.42			154	0.48	976
215	Kärki and Paulamäki 2006	TGG	OL-KR20	258.1	TGG	OL-KR20_258.1_215	65.69	16.24	5.2	1.35	2.15	4.18	3.55	0.71	0.37	0.05	0.01	0.4					903			0.3	0.01		195		7	27	7.2	11	6.14	2.83	2.25			8.9		9		1.12			109	0.52	357
216	Kärki and Paulamäki 2006	TGG	OL-KR20	310.35	TGG	OL-KR20_310.35_216	65.94	15.7	4.54	1.23	2.01	3.52	4.47	0.62	0.31	0.05	0.01	0.4					975			0.3	0.01		177		7	25	7.1	19	6.16	2.94	2.24			8.16		9		1.14			98.5	0.51	377
217	Kärki and Paulamäki 2006	TGG	OL-KR20	350.5	VGN	OL-KR20_350.5_217	67.57	15.74	4.56	1.06	1.74	3.48	4.54	0.49	0.32	0.12	0.01	0.4					902			0.3	0.03		124		7	25	6.9	38	4.99	3.39	1.94			6.07		7		1.09			68.4	0.52	893
219	Kärki and Paulamäki 2006	High-P TGG	OL-KR20	490.61	MFGN	OL-KR20_490.61_219	48.45	16.14	11.07	4.2	6.57	3.24	3.39	2.52	1.49	0.16	0.01	0.8					1440			0.6	0.03		331		20	40	5.7	29	10	4.56	6.18			17.4		12		1.73			163	0.56	1190
220	Kärki and Paulamäki 2006	TGG	OL-KR20	492.36	MGN	OL-KR20_492.36_220	55.21	16.39	8.98	3.79	5.61	2.15	3.04	2.05	1.24	0.13	0.01	0.5					1220			0.3	0.02		261		17	31	9.9	73	8.37	3.7	5.1			13.6		11		1.46			125	0.48	967
221	Kärki and Paulamäki 2006	TGG	OL-KR20	34.64	MGN	OL-KR20_34.64_221	60.13	17.1	6.97	2.42	3.77	3.49	2.81	1.16	0.65	0.08	0.01	0.6					716			0.3	0.03		227		12	17	12.3	7	6.82	3.24	2.9			10.5		12		1.24			125	0.55	587
225	Kärki and Paulamäki 2006	TGG	OL-KR21	82.9	TGG	OL-KR21_82.9_225	62.56	16.34	6.16	2.36	3.17	3.8	2.67	0.98	0.63	0.08	0.01	0.6					704			0.3	0.03		189		11	46	16.7	23	6.17	3.07	2.37			8.98		10		1.13			102	0.42	550
226	Kärki and Paulamäki 2006	TGG	OL-KR21	96.38	TGG	OL-KR21_96.38_226	62.93	15.98	5.35	2.02	3.5	3.18	4.25	0.97	0.46	0.07	0.01	0.5					1310			0.3	0.02		214		10	28	5.4	17	5.73	2.72	3.07			8.54		14		1.01			117	0.44	557
228	Kärki and Paulamäki 2006	TGG	OL-KR21	162.05	TGG	OL-KR21_162.05_228	63.69	16.51	6.04	2.13	3.14	3.67	2.56	0.93	0.45	0.06	0.01	0.8					808			0.3	0.03		194		12	36	12.2	94	6.38	3.04	2.38			9.18		11		1.16			108	0.5	462
233	Kärki and Paulamäki 2006	TGG	OL-KR21	273.15	TGG	OL-KR21_273.15_233	64.63	16.58	5.55	1.63	2.21	3.23	4.28	0.78	0.42	0.06	0.01	0.6					1110			0.3	0.03		208		7	30	8.1	7	5.45	2.58	2.65			8.72		12		0.97			115	0.41	449
145	Kärki and Paulamäki 2006	TGG	OL-KR1	943.65	TGG	OL-KR1_943.65_145	73.77	14.27	1.4	0.32	1.14	4.31	3.82	0.23	0.12	0.02		0.6					250				0.01		77.6	140		16	3.2		1.88	0.63	0.42	189		3.9		4		0.28			38.1	0.05	144
5	Kärki and Paulamäki 2006	TGG	OL-KR2	750.5	PGR	OL-KR2_750.5_5	73.8	15	0.22	0.01	0.69	3.8	4.61	0.01	0.2	0.05		0.4					70			1.2				139			1.4					14
86	Kärki and Paulamäki 2006	TGG	OL-KR13	454	PGR	OL-KR13_454_86	76.4	15.29	1.5	0.22	0.74	2.8	2.54	0.03	0.11	0.14	0.01	0.7	1				183			0.8	0.01		3.7	124	0.7	7	4.9	3	0.88	1.26	0.33	14	19	0.37		3		0.28			1.9	0.5
142	Kärki and Paulamäki 2006	TGG	OL-KR1	831.35	MGN	OL-KR1_831.35_142	71.39	12.57	4.72	2.1	3.22	2.08	1.84	0.61	0.08	0.08	0.01	1.45					314				0.63		81.5	60	15	79	6.4	31	3.96	2.19	1.3	633		5.03		6		0.78			41	0.31	602
157	Kärki and Paulamäki 2006	TGG	OL-KR5	523.15	QGN	OL-KR5_523.15_157	75.17	11.94	3.59	1.36	3.45	2.1	1.32	0.44	0.13	0.06	0.01	0.55					232				0.06		71.3	70	13	68	4.9	20	3.29	1.81	1.16	533		4.34		5		0.65			39.1	0.23	431
39	Kärki and Paulamäki 2006	TGG	OL-KR11	123.9	DGN	OL-KR11_123.9_39	61.2	17.5	4.19	1.64	12.7	0.42	0.48	0.48	0.21	0.26	0.01	1.05					69			1.2				35			7					324
74	Kärki and Paulamäki 2006	TGG	OL-KR13	56.8	MGN	OL-KR13_56.8_74	68.4	14.91	4.54	1.96	2.91	3.7	1.92	0.55	0.19	0.05	0.01	1	1				245			0.3	0.3		56.9	160	12.9	81	9.4	23	3.46	1.72	1.12	1230	19	4.22		4		0.66			27.5	0.23
200	Kärki and Paulamäki 2006	TGG	OL-KR19	428.45	MGN	OL-KR19_428.45_200	72.31	12.25	4.68	2.11	2.34	2.43	1.86	0.44	0.12	0.09	0.02	1.2					783			0.3	0.39		67.8		7	113	10.1	48	4.13	2.4	1.29			4.47		5		0.87			38.8	0.43	666
205	Kärki and Paulamäki 2006	TGG	OL-KR19	509.83	MGN	OL-KR19_509.83_205	57.8	13.62	4.14	1.64	15.27	0.4	0.36	0.42	0.14	0.36	0.01	6					75			0.6	2.61		64.8		7	75	1.6	7	7.04	4.21	3.48			6.67		4		1.49			43.7	0.63	2730
206	Kärki and Paulamäki 2006	TGG	OL-KR19	18.9	MGN	OL-KR19_18.9_206	69.5	15.42	3.4	1.84	3.64	0.78	2.22	0.74	0.01	0.11	0.01	2.3					982			0.3	0.17		77.6		7	114	9.9	7	1.29	0.85	0.93			2.31		11		0.25			45.2	0.19	778
51	Kärki and Paulamäki 2006	TGG	OL-KR11	990.2	TGG	OL-KR11_990.2_51	73.6	13.8	1.77	0.54	0.84	3.56	4.64	0.2	0.13	0.02	0.01	0.6					425			4.1				184			4					406
77	Kärki and Paulamäki 2006	TGG	OL-KR13	167.69	MGN	OL-KR13_167.69_77	61.5	16.31	8.38	3.01	1.11	2.74	2.64	0.63	0.1	0.06	0.01	3.25	1				502			0.3	0.27		80.9	134	18.3	86	8.2	123	4.52	2.47	1.32	971	23	5.29		4		0.92			40.7	0.37
212	Kärki and Paulamäki 2006	TGG	OL-KR20	180.45	VGN	OL-KR20_180.45_212	61.31	17.02	8.1	2.6	1.25	3.36	2.91	0.69	0.12	0.16	0.01	1.3					154			0.3	0.03		87		7	108	14.3	18	5.5	3.92	0.87			5.76		6		1.25			49.2	0.77	1170
48	Kärki and Paulamäki 2006	TGG	OL-KR11	828.6	PGR	OL-KR11_828.6_48	71.3	14.1	2.16	0.18	0.65	2.06	7.76	0.09	0.44	0.02	0.12	0.75					173			1.8				190			5					268
75	Kärki and Paulamäki 2006	TGG	OL-KR13	75.8	PGR	OL-KR13_75.8_75	75.3	14.08	0.26	0.16	0.98	3.65	4.1	0.02	0.16	0.01	0.01	1.25	1				379			0.3	0.15		7.6	122	0.3	7	3.3	3	2.04	1.32	0.81	189	14	0.92		3		0.41			4	0.2
79	Kärki and Paulamäki 2006	TGG	OL-KR13	269.18	PGR	OL-KR13_269.18_79	78.7	12.02	0.34	0.19	0.61	2.53	5.21	0.05	0.13	0.01	0.01	0.3	1				600			1	0.01		9.4	130	0.3	7	2.1	3	0.28	0.1	0.79	14	10	0.44		1		0.03			4.9	0.03
125	Kärki and Paulamäki 2006	TGG	OL-KR1	107.85	MGN	OL-KR1_107.85_125	60.01	17.31	4.08	1.25	11.39	0.62	1.97	0.54	0.22	0.23		2.45					225				0.22		66			68	5.1		4.04	2.28	1.22	260		5.04		5		0.83			34	0.32	1620
136	Kärki and Paulamäki 2006	TGG	OL-KR1	552.18	VGN	OL-KR1_552.18_136	66.34	15.19	5.98	3.15	2.22	2.43	2.61	0.7	0.2	0.06	0.02	0.8					330				0.18		72.5	70	16	153	12.7		4	2.44	1.45	745		5.13		5		0.8			36.2	0.4	413
144	Kärki and Paulamäki 2006	High-P TGG	OL-KR1	875.25	MFGN	OL-KR1_875.25_144	51.65	14.26	9.53	9.03	11.04	0.67	0.98	0.66	0.17	0.16	0.29	1.65					58.2			0.5	0.55		34.4	70	54	1880	2.5		2.73	1.56	1.14	1590		3.7		2		0.57			18.9	0.2	1190
41	Kärki and Paulamäki 2006	High-P TGG	OL-KR11	240.3	MFGN	OL-KR11_240.3_41	49.6	12.6	12.4	8.92	11.4	1.05	0.46	1.13	0.13	0.22	0.08	0.95					87			1.2				35			7					1370
190	Kärki and Paulamäki 2006	TGG	OL-KR19	88.16	MGN	OL-KR19_88.16_190	67.82	14.17	5.93	1.83	3.59	2.28	2.05	0.61	0.18	0.05	0.02	1.6					197			0.3	0.2		64.7		15	139	7.8	302	3.29	1.96	1.02			4.52		5		0.68			29.5	0.31	437
203	Kärki and Paulamäki 2006	TGG	OL-KR19	504.08	QGN	OL-KR19_504.08_203	68.31	14.82	4.67	1.78	3.37	3.39	1.7	0.52	0.21	0.07	0.01	1.2					250			0.3	0.49		67.6		13	86	6.7	58	4.24	2.51	1.22			4.63		5		0.86			38.3	0.38	564
224	Kärki and Paulamäki 2006	TGG	OL-KR21	50.9	QGN	OL-KR21_50.9_224	70.62	12.77	3.81	1.71	7.55	0.48	1.03	0.41	0.23	0.15	0.01	1.2					143			0.3	0.24		56.1		11	65	4.5	31	4.49	2.63	1.02			4.51		4		0.94			31.2	0.43	1130
123	Kärki and Paulamäki 2006	TGG	OL-KR1	69	VGN	OL-KR1_69_123	66.63	15.47	6.1	2.3	1.13	2.68	3.6	0.65	0.09	0.04	0.01	1.2					341				0.12		85.7	80	17	95	12	35	4.06	1.82	0.96	785		5.76		5		0.7			43.4	0.21	314
128	Kärki and Paulamäki 2006	TGG	OL-KR1	234.45	VGN	OL-KR1_234.45_128	63.27	16.77	7.25	2.78	1.01	2.54	3.76	0.8	0.1	0.07	0.02	2.05					238				0.39		90.5	80	16	133	17.7	40	4.78	2.68	0.64	806		6.09		6		0.93			45.5	0.33	509
129	Kärki and Paulamäki 2006	TGG	OL-KR1	262.1	MGN	OL-KR1_262.1_129	70.84	13.37	4.64	1.7	1.57	3.01	3.19	0.54	0.14	0.04	0.02	1					833				0.24		74.2	70	12	103	11.4	35	4.13	2.4	1.09	743		5.08		5		0.82			37.5	0.32	291
130	Kärki and Paulamäki 2006	TGG	OL-KR1	279.13	QGN	OL-KR1_279.13_130	75.11	11.68	3.46	1.4	1.23	2.89	3.02	0.44	0.13	0.03	0.01	0.65					615				0.11		72.4	70		102	8.9	16	3.46	1.87	1.1	309		4.69		6		0.68			37.4	0.27	267
133	Kärki and Paulamäki 2006	TGG	OL-KR1	349.5	MGN	OL-KR1_349.5_133	63.36	17.3	7.28	2.64	0.89	2.11	4.22	0.71	0.14	0.04	0.02	1.3					609				0.02		71.9	80	15	120	10.8	51	4.41	2.57	1.3	743		5.19		4		0.91			36.2	0.38	321
134	Kärki and Paulamäki 2006	TGG	OL-KR1	368.13	VGN	OL-KR1_368.13_134	68.49	14.9	5.46	1.86	0.9	1.98	4.24	0.6	0.15	0.03	0.02	1.45					537				0.15		84.4	80	11	96	14.8	17	4.59	2.58	1.32	615		6.01		5		0.9			44.3	0.36	194
135	Kärki and Paulamäki 2006	TGG	OL-KR1	406.43	VGN	OL-KR1_406.43_135	66.61	15.62	6.24	2.61	1.41	2.24	2.92	0.64	0.08	0.04	0.02	1.3					516				0.55		69.1	63	13	120	8.3		3.63	2.12	1.25	690		4.68		4		0.74			35.3	0.29	280
137	Kärki and Paulamäki 2006	TGG	OL-KR1	562.6	VGN	OL-KR1_562.6_137	64.52	16.37	6.72	2.93	1.72	2.63	3	0.71	0.18	0.05	0.02	1.2					486				0.17		74.4	86	14	135	9.1	38	4.06	2.37	1.24	859		5.38		5		0.83			38.1	0.35	384
140	Kärki and Paulamäki 2006	TGG	OL-KR1	738.9	VGN	OL-KR1_738.9_140	62.84	17.2	8.05	3.02	0.79	1.81	4.14	0.82	0.09	0.04	0.02	1.3					472				0.26		95.7	80	16	134	14.8	38	4.45	2.11	1.31	810		6.38		6		0.82			48.6	0.28	301
141	Kärki and Paulamäki 2006	TGG	OL-KR1	761.83	VGN	OL-KR1_761.83_141	66.53	15.36	5.42	2.14	1.21	2.81	4.58	0.62	0.13	0.05	0.01	1.2					910				0.37		68	110	14	90	8.3	12	3.61	2.02	1.29	633		4.59		5		0.72			35.7	0.29	344
143	Kärki and Paulamäki 2006	TGG	OL-KR1	843.86	VGN	OL-KR1_843.86_143	69.04	13.39	6.37	1.88	1.66	3.07	1.8	0.49	0.14	0.04		2.2					145				0.74		54.2	110	21	77	5.1	106	3.01	1.7	0.76	572		3.69		4		0.59			27.7	0.21	318
1	Kärki and Paulamäki 2006	TGG	OL-KR2	533.3	VGN	OL-KR2_533.3_1	67	16	5.37	2.09	0.57	1.62	3.94	0.49	0.16	0.04		2					461			1.8				138			7.5					728
2	Kärki and Paulamäki 2006	TGG	OL-KR2	636.15	MGN	OL-KR2_636.15_2	61.8	16.5	6.88	3.41	1.16	2.23	3.68	0.6	0.11	0.08		2.35					678			1.3				74			8.7					971
3	Kärki and Paulamäki 2006	TGG	OL-KR2	647.8	MGN	OL-KR2_647.8_3	75.9	11.2	3.37	1.48	1.89	2.87	1.43	0.35	0.07	0.03		0.6					167			1.1				95			4.4					667
4	Kärki and Paulamäki 2006	TGG	OL-KR2	703.1	TGG	OL-KR2_703.1_4	70.8	13.9	1.98	0.73	1.13	3.67	4.58	0.3	0.12	0.01		0.95					563			1.8				232			1.8					330
6	Kärki and Paulamäki 2006	High-P TGG	OL-KR2	997.7	DGN	OL-KR2_997.7_6	53.5	20	9.23	3.8	0.89	2.08	4.17	0.76	0.11	0.08		4.3					744			1.1				140			9.8					1300
146	Kärki and Paulamäki 2006	TGG	OL-KR5	74.4	VGN	OL-KR5_74.4_146	62.64	17.48	7.64	2.73	0.68	1.92	3.7	0.75	0.09	0.05	0.02	2.35					308				0.03		79.6	100	15	126	13.8	62	4.02	2.23	0.89	745		5.25		4		0.77			42.2	0.33	361
148	Kärki and Paulamäki 2006	TGG	OL-KR5	167.93	VGN	OL-KR5_167.93_148	63.5	17.2	7.26	2.5	1.02	1.94	4.14	0.71	0.1	0.03	0.02	1.7					671				0.26		85.4	120	14	140	9.5	50	4.3	2.56	1.33	565		5.68		5		0.87			43.4	0.36	247
150	Kärki and Paulamäki 2006	TGG	OL-KR5	266.9	VGN	OL-KR5_266.9_150	67.9	14.11	6.8	2.6	0.83	1.68	3.13	0.7	0.07	0.04	0.02	2.2					442				0.15		72.4	80		81	10.9	25	3.61	2.07	0.95	790		4.63		5		0.73			37.3	0.29	297
155	Kärki and Paulamäki 2006	TGG	OL-KR5	412.5	VGN	OL-KR5_412.5_155	65.07	16.22	6.73	2.43	0.75	1.87	3.74	0.66	0.12	0.05	0.02	2.4					338				0.32		81.4	100	13	107	9.7	53	4.62	2.52	0.97	795		5.52		5		0.89			41.7	0.32	343
156	Kärki and Paulamäki 2006	TGG	OL-KR5	502.42	VGN	OL-KR5_502.42_156	70.38	13.95	4.96	2	1.87	3.15	1.91	0.53	0.14	0.05	0.01	1.2					119				0.35		70.8	100	11	75	8.8	22	3.64	2.12	0.92	646		4.54		4		0.72			35.4	0.28	361
52	Kärki and Paulamäki 2006	TGG	OL-KR6	318.02	VGN	OL-KR6_318.02_52	65.9	16.4	5.39	1.97	1.58	3.31	3.01	0.5	0.25	0.04	0.01	1.8					419			0.9				117			11					793
55	Kärki and Paulamäki 2006	TGG	OL-KR6	543.04	VGN	OL-KR6_543.04_55	62.8	17.7	6.5	2.7	0.76	1.98	5.08	0.61	0.16	0.07	0.02	1.5					1150			3.1				90			14					1060
40	Kärki and Paulamäki 2006	TGG	OL-KR11	212	VGN	OL-KR11_212_40	70.1	13.5	4.54	1.8	1.09	2.5	3.47	0.53	0.1	0.04	0.01	1					654			3.2				35			13					664
42	Kärki and Paulamäki 2006	TGG	OL-KR11	242.2	DGN	OL-KR11_242.2_42	68.6	13.9	5.97	2.14	0.96	2.23	3.09	0.64	0.09	0.02	0.02	1.55					526			2.6				76			10					827
46	Kärki and Paulamäki 2006	TGG	OL-KR11	506.9	DGN	OL-KR11_506.9_46	65.1	16.4	5.05	1.87	0.58	1.81	5.66	0.48	0.15	0.03	0.03	1.25					962			1.6				78			6					940
47	Kärki and Paulamäki 2006	TGG	OL-KR11	713.4	DGN	OL-KR11_713.4_47	63.8	16.3	7.32	2.73	1.28	2.01	4.12	0.68	0.17	0.04	0.02	1.85					640			1.1				53			10					1090
49	Kärki and Paulamäki 2006	TGG	OL-KR11	897.6	DGN	OL-KR11_897.6_49	65.5	15.4	6.65	2.57	1.43	2.88	2.26	0.62	0.1	0.05	0.04	2.65					437			0.8				106			1					859
50	Kärki and Paulamäki 2006	TGG	OL-KR11	932	DGN	OL-KR11_932_50	62	16.6	8.79	2.76	0.39	2.48	2.61	0.71	0.12	0.14	0.26	3.25					256			1.4				139			1					1000
72	Kärki and Paulamäki 2006	High-P TGG	OL-KR13	24.8	MGN	OL-KR13_24.8_72	52.6	17.77	13.45	4.2	0.56	0.98	3.82	0.88	0.07	0.09	0.02	5.85	1				194			0.3	0.88		108	156	42.1	165	17.6	250	6.52	3.5	0.86	1380	31	8.3		6		1.27			57.7	0.49
73	Kärki and Paulamäki 2006	TGG	OL-KR13	51.32	DGN	OL-KR13_51.32_73	65.2	15.6	6.68	2.27	1.19	3.13	2.35	0.49	0.2	0.05	0.01	2.95	1				295			0.3	0.46		69.8	163	14.2	83	7.7	59	3.47	1.43	1.01	842	23	4.84		4		0.59			35.3	0.16
78	Kärki and Paulamäki 2006	TGG	OL-KR13	172.05	VGN	OL-KR13_172.05_78	66.5	15.32	5.4	1.93	1	2.49	3.95	0.54	0.11	0.06	0.01	2.55	1				721			0.7	0.32		71.4	161	10.6	103	5.6	18	3.35	1.92	1.24	666	19	4.91		4		0.66			35.6	0.26
83	Kärki and Paulamäki 2006	High-P TGG	OL-KR13	325.37	MGN	OL-KR13_325.37_83	57.6	19.31	9.18	3.34	0.78	1.83	5.16	0.79	0.08	0.06	0.02	2.25	1				919			0.8	0.01		101	138	19.4	139	31.7	85	4.46	2.3	1.54	1340	27	6.37		5		0.85			51.8	0.36
85	Kärki and Paulamäki 2006	TGG	OL-KR13	434.4	VGN	OL-KR13_434.4_85	62.2	17.21	7.54	3.12	0.81	2.16	3.85	0.75	0.1	0.05	0.02	2.35	1				496			0.5	0.33		89.8	136	18.3	156	13.9	52	4.9	2.75	1.13	1120	24	6.01		5		0.95			45.4	0.37
189	Kärki and Paulamäki 2006	TGG	OL-KR19	68.13	VGN	OL-KR19_68.13_189	59.52	17.52	8.4	3.27	0.91	2.4	3.38	0.74	0.08	0.05	0.02	3					536			0.3	0.51		87.1		14	137	14.7	89	5.28	3.03	1.32			5.37		5		1.06			51	0.48	381
192	Kärki and Paulamäki 2006	TGG	OL-KR19	197.15	MGN	OL-KR19_197.15_192	60.94	17.99	7.53	3.02	0.67	1.99	4.45	0.67	0.09	0.04	0.02	2.8					706			0.3	0.33		81.5		12	125	13.6	91	5.12	2.68	1.33			5.42		4		0.96			47.6	0.44	339
194	Kärki and Paulamäki 2006	TGG	OL-KR19	240.73	MGN	OL-KR19_240.73_194	68.22	14.77	5.54	1.93	0.97	2.09	3.4	0.58	0.13	0.04	0.02	2					668			0.3	0.25		75.9		7	107	10.2	17	4.17	2.36	1.41			4.94		6		0.85			43.6	0.35	283
195	Kärki and Paulamäki 2006	TGG	OL-KR19	250	QGN	OL-KR19_250_195	72.6	12.59	4.22	1.69	1.22	2.83	1.89	0.5	0.18	0.04	0.02	2					362			0.3	0.25		66		12	164	3.9	14	3.55	2.09	1.17			4.15		6		0.7			38	0.31	313
196	Kärki and Paulamäki 2006	TGG	OL-KR19	266.4	VGN	OL-KR19_266.4_196	68.08	14.65	5.75	2.25	1.51	3.01	2.73	0.61	0.14	0.03	0.02	1					449			0.3	0.11		76.7		7	142	9.8	31	4.35	2.25	1.52			5.22		5		0.85			44	0.36	254
197	Kärki and Paulamäki 2006	TGG	OL-KR19	334.23	VGN	OL-KR19_334.23_197	65.94	16.2	6.47	2.45	1.04	2.1	3.62	0.68	0.11	0.03	0.02	1.8					675			0.9	0.24		84.4		12	138	12.8	44	5.22	3.04	1.39			5.62		22		1.01			48.7	0.53	263
199	Kärki and Paulamäki 2006	TGG	OL-KR19	395.74	VGN	OL-KR19_395.74_199	58.92	18.76	8.32	3.22	0.61	2.01	3.88	0.89	0.08	0.06	0.02	3.2					241			0.3	0.47		111		14	162	12.7	52	5.6	2.6	0.86			6.83		6		1.02			63	0.4	418
201	Kärki and Paulamäki 2006	TGG	OL-KR19	435.5	VGN	OL-KR19_435.5_201	62.08	17.27	7.18	2.82	0.79	2.17	3.56	0.69	0.1	0.05	0.02	2.6					366			0.3	0.23		82.7		14	130	15.1	48	5.23	2.91	1.15			5.56		6		1.04			47	0.46	361
204	Kärki and Paulamäki 2006	TGG	OL-KR19	509.46	MGN	OL-KR19_509.46_204	66.74	15.15	5.99	2.67	1.01	2.94	2.05	0.59	0.13	0.05	0.01	2.8					325			0.6	0.68		65.4		14	102	4.7	45	4.25	2.48	1.16			4.31		4		0.89			37.5	0.41	418
207	Kärki and Paulamäki 2006	TGG	OL-KR19	21.38	QGN	OL-KR19_21.38_207	77.38	10.27	2.88	1.17	0.66	1.78	4.05	0.36	0.1	0.03	0.02	1.4					476			0.3	0.59		57.9		7	104	4.8	7	3.42	1.98	1.05			3.47		5		0.72			32.7	0.35	244
210	Kärki and Paulamäki 2006	TGG	OL-KR20	114.35	VGN	OL-KR20_114.35_210	62.38	16.31	7.06	2.66	1.41	3.21	2.98	0.75	0.09	0.05	0.02	2					284			0.3	0.67		88.5		13	144	13.9	39	4.5	2.12	1.13			5.64		6		0.82			49.9	0.38	384
211	Kärki and Paulamäki 2006	TGG	OL-KR20	139.22	VGN	OL-KR20_139.22_211	68.44	15.7	4.39	1.71	1.43	3.94	2	0.37	0.13	0.05	0.01	1.4					162			0.3	0.02		30.2		11	64	9.4	53	3.34	2.25	0.63			2.49		2		0.75			17.6	0.41	340
213	Kärki and Paulamäki 2006	TGG	OL-KR20	216.4	VGN	OL-KR20_216.4_213	66.59	15.55	6.14	2.23	0.95	2.75	3.48	0.62	0.15	0.03	0.02	1.6					393			0.3	0.23		78.4		7	119	10.7	39	4.91	2.83	1.09			5.16		5		0.95			45	0.42	265
218	Kärki and Paulamäki 2006	TGG	OL-KR20	459.62	VGN	OL-KR20_459.62_218	65.11	16.31	6.48	2.27	0.58	1.88	4.84	0.67	0.1	0.05	0.01	1.7					354			0.3	0.32		56		7	86	12	45	1.64	0.41	0.68			2.89		4		0.22			32.1	0.03	393
222	Kärki and Paulamäki 2006	TGG	OL-KR20	44.62	VGN	OL-KR20_44.62_222	66.8	15.22	4.89	1.87	0.93	2.66	4.04	0.46	0.19	0.04	0.01	2.1					413			0.3	0.54		48.9		10	60	10.9	43	2.29	0.89	0.92			3.13		3		0.38			28.5	0.15	307
223	Kärki and Paulamäki 2006	TGG	OL-KR21	31.04	VGN	OL-KR21_31.04_223	62.3	18.07	6.49	2.64	1.62	3.75	2.41	0.6	0.11	0.05	0.02	2.2					279			0.3	0.28		65.2		19	116	10.9	93	4.94	3.01	1.34			4.86		3		1.02			37	0.43	401
227	Kärki and Paulamäki 2006	TGG	OL-KR21	142.08	VGN	OL-KR21_142.08_227	62.67	17.21	7.26	2.73	0.84	2.1	3.95	0.7	0.11	0.05	0.02	2.6					633			0.3	0.35		85.2		11	125	15.1	40	5.22	3.04	1.29			5.88		5		1.06			49.3	0.46	383
229	Kärki and Paulamäki 2006	TGG	OL-KR21	170.11	VGN	OL-KR21_170.11_229	61.71	17.54	7.69	3.07	0.89	2.17	3.79	0.78	0.1	0.04	0.02	2.7					387			0.3	0.29		80.9		14	144	14.1	73	4.55	2.55	1.47			5.18		10		0.9			47.1	0.47	279
230	Kärki and Paulamäki 2006	TGG	OL-KR21	213.12	VGN	OL-KR21_213.12_230	69.07	15.58	4.01	1.31	1.79	3.02	2.66	0.34	0.11	0.03	0.01	2					365			0.3	0.23		35.7		7	55	5.3	35	2.08	1.11	1.19			2.34		2		0.41			21.2	0.18	273
231	Kärki and Paulamäki 2006	TGG	OL-KR21	221.25	VGN	OL-KR21_221.25_231	56.13	19.6	8.74	3.4	0.78	1.97	4.1	0.86	0.06	0.04	0.02	3.5					629			0.3	1.04		92.8		14	153	11.7	135	5.92	3.52	1.27			6.04		6		1.24			53.3	0.56	298
232	Kärki and Paulamäki 2006	TGG	OL-KR21	245.16	VGN	OL-KR21_245.16_232	65.25	16.35	6.66	2.65	0.73	1.92	3.9	0.74	0.09	0.04	0.02	1.9					426			0.3	0.15		88.5		11	144	9.8	23	5.37	3.09	1.15			5.67		6		1.03			49.6	0.45	317
76	Kärki and Paulamäki 2006	High-P TGG	OL-KR13	163.72	MFGN	OL-KR13_163.72_76	45.5	12.57	12.63	15.34	3.96	0.01	0.05	0.89	0.19	0.16	0.25	8.9	1				50			0.3	0.79		23.4	150	76.6	1710	1.3	5	3.14	1.73	0.56	2740	24	3.31		2		0.64			10.5	0.25
References
Kärki, A., Paulamäki, S., 2006. Petrology of Olkiluoto (Posiva Report No. 2006- 02). Posiva Oy, Olkiluoto.
[truncated: 23 more columns]
