# Supplementary material for: Insights into the tectonic evolution of the Svecofennian orogeny based on in situ Lu–Hf dating of garnet and apatite from Olkiluoto, southwestern Finland
Source: Copernicus journal article supplement (doi:10.5194/se-16-97-2025), 2025-02-11
Supplement: Supplementary file 2 [file se-16-97-2025-supplement.zip]

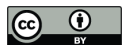

*Supplement of*

**Insights into the tectonic evolution of the Svecofennian orogeny based on in situ Lu–Hf dating of garnet and apatite from Olkiluoto, southwestern Finland**

**Jon Engström et al.**

*Correspondence to:* Jon Engström ([jon.engstrom@gtk.fi](mailto:jon.engstrom@gtk.fi))

- [se-16-97-2025-supplement-title-page.pdf](#)
- [Copy of Supplementary\\_Table\\_version\\_3.xlsx](#)
- [Supplementary\\_Figures\\_version\\_3.pdf](#)

The copyright of individual parts of the supplement might differ from the article licence.
